# Supplementary material for: Twinned versus linked organometallics - bimetallic “half-baguette” pentalenide complexes of Rh(i)
Source: Royal Society of Chemistry journal article supplement (doi:10.1039/d3dt04325h), 2024-01-01
Supplement: d3dt04325h1.pdf [file d3dt04325h1.pdf]

# Twinned *versus* Linked Organometallics - Bimetallic “Half-Baguette” Pentalenide Complexes of Rh(I)

Hugh J. Sanderson,<sup>a</sup> Gabriele Kociok-Köhn,<sup>b</sup> Claire L. McMullin,<sup>a</sup> Ulrich Hintermair\*<sup>a,c</sup>

*a)* Department of Chemistry, University of Bath, Claverton Down, Bath BA2 7AY, UK.

*b)* Material and Chemical Characterisation Facility, University of Bath, Claverton Down, Bath BA2 7AY, UK.

*c)* Institute for Sustainability, University of Bath, Claverton Down, Bath, BA2 7AY, UK.

[u.hintermair@bath.ac.uk](mailto:u.hintermair@bath.ac.uk)

## Supporting Information

## Contents

|                                                                                                                                                                     |    |
|---------------------------------------------------------------------------------------------------------------------------------------------------------------------|----|
| Spectroscopic Data .....                                                                                                                                            | 3  |
| <i>Anti</i> -[Rh <sup>I</sup> (COD)] <sub>2</sub> [μ:η <sup>5</sup> :η <sup>5</sup> Ph <sub>4</sub> Pn] ( <b>1</b> ).....                                           | 3  |
| <i>Anti</i> -[Ir <sup>I</sup> (COD)] <sub>2</sub> [μ:η <sup>5</sup> :η <sup>5</sup> Ph <sub>4</sub> Pn] ( <b>2</b> ).....                                           | 5  |
| <i>Anti</i> -[Rh <sup>I</sup> (NBD)] <sub>2</sub> [μ:η <sup>5</sup> :η <sup>5</sup> Ph <sub>4</sub> Pn] ( <b>3</b> ).....                                           | 8  |
| <i>Anti</i> -[Rh <sup>I</sup> (C <sub>2</sub> H <sub>4</sub> ) <sub>2</sub> ] <sub>2</sub> [μ:η <sup>5</sup> :η <sup>5</sup> Ph <sub>4</sub> Pn] ( <b>4</b> ) ..... | 9  |
| <i>Syn</i> -[Rh <sup>I</sup> (CO) <sub>2</sub> ] <sub>2</sub> [μ:η <sup>5</sup> :η <sup>5</sup> Ph <sub>4</sub> Pn] ( <b>5</b> ).....                               | 11 |
| UV-vis spectra of <b>1</b> , <b>5</b> and (Ph <sub>2</sub> Cp)Rh <sup>I</sup> (CO) <sub>2</sub> .....                                                               | 15 |
| Attempted reaction of <b>5</b> with 2-2'-bipyridine .....                                                                                                           | 16 |
| Attempted reaction of <b>5</b> with pyridine.....                                                                                                                   | 16 |
| Substitution of <b>5</b> with Triphenylphosphine .....                                                                                                              | 17 |
| Substitution of <b>5</b> with Trimethylphosphine.....                                                                                                               | 19 |
| Substitution of <b>5</b> with bis(diphenylphosphino)ethane .....                                                                                                    | 22 |
| Reaction of <b>5</b> with Triphenylphosphite .....                                                                                                                  | 24 |
| [Rh <sup>I</sup> (CO)(P{OPh} <sub>3</sub> ) <sub>2</sub> ] <sub>2</sub> [μ:η <sup>5</sup> :η <sup>5</sup> Ph <sub>4</sub> Pn] ( <b>11</b> ) .....                   | 28 |
| Reaction of <b>5</b> with Trimethylphosphite .....                                                                                                                  | 30 |
| UV-vis Spectra of <b>5</b> , <b>6</b> and <b>11</b> .....                                                                                                           | 32 |
| Near-IR Spectra of <b>5</b> , <b>10</b> and <b>11</b> .....                                                                                                         | 32 |
| Computational Details.....                                                                                                                                          | 33 |
| Methodology .....                                                                                                                                                   | 33 |
| Breakdown of Energy Contributions.....                                                                                                                              | 33 |
| NBO Data .....                                                                                                                                                      | 34 |
| Cartesian Coordinates and Computed Energies (in Hartrees) for Calculated Structures .....                                                                           | 36 |
| References .....                                                                                                                                                    | 39 |
| Crystallographic Data.....                                                                                                                                          | 40 |
| <i>Anti</i> -[Rh <sup>I</sup> (COD)] <sub>2</sub> [μ:η <sup>5</sup> :η <sup>5</sup> Ph <sub>4</sub> Pn] ( <b>1</b> ).....                                           | 40 |
| <i>Anti</i> -[Ir <sup>I</sup> (COD)] <sub>2</sub> [μ:η <sup>5</sup> :η <sup>5</sup> Ph <sub>4</sub> Pn] ( <b>2</b> ).....                                           | 41 |
| <i>Anti</i> -[Rh <sup>I</sup> (NBD)] <sub>2</sub> [μ:η <sup>5</sup> :η <sup>5</sup> Ph <sub>4</sub> Pn] ( <b>3</b> ).....                                           | 42 |
| <i>Anti</i> -[Rh <sup>I</sup> (C <sub>2</sub> H <sub>4</sub> ) <sub>2</sub> ] <sub>2</sub> [μ:η <sup>5</sup> :η <sup>5</sup> Ph <sub>4</sub> Pn] ( <b>4</b> ) ..... | 43 |
| <i>Syn</i> -[Rh <sup>I</sup> (CO) <sub>2</sub> ] <sub>2</sub> [μ:η <sup>5</sup> :η <sup>5</sup> Ph <sub>4</sub> Pn] ( <b>5</b> ).....                               | 44 |
| [Rh <sup>II</sup> (CO)(PMe <sub>3</sub> ) <sub>4</sub> ][Ph <sub>4</sub> Pn] ( <b>8</b> ) .....                                                                     | 46 |
| [Rh <sup>I</sup> (dppe) <sub>2</sub> ][Rh <sup>I</sup> (CO) <sub>2</sub> (η <sup>5</sup> -Ph <sub>4</sub> Pn)] ( <b>9</b> ) .....                                   | 47 |
| [Mg <sub>2</sub> (μ-Cl) <sub>3</sub> ][Rh <sup>I</sup> (CO) <sub>2</sub> (η <sup>5</sup> -Ph <sub>4</sub> Pn)].....                                                 | 48 |
| [Rh <sup>I</sup> (CO)(P{OPh} <sub>3</sub> ) <sub>2</sub> ] <sub>2</sub> [μ:η <sup>5</sup> :η <sup>5</sup> Ph <sub>4</sub> Pn] ( <b>11</b> ) .....                   | 49 |
| [Rh <sup>I</sup> (CO)(P{OMe} <sub>3</sub> ) <sub>2</sub> ] <sub>2</sub> [μ:η <sup>5</sup> :η <sup>5</sup> Ph <sub>4</sub> Pn] ( <b>12</b> ).....                    | 50 |

## Spectroscopic Data

*Anti*-[Rh<sup>I</sup>(COD)]<sub>2</sub>[μ:η<sup>5</sup>:η<sup>5</sup>Ph<sub>4</sub>Pn] (**1**)

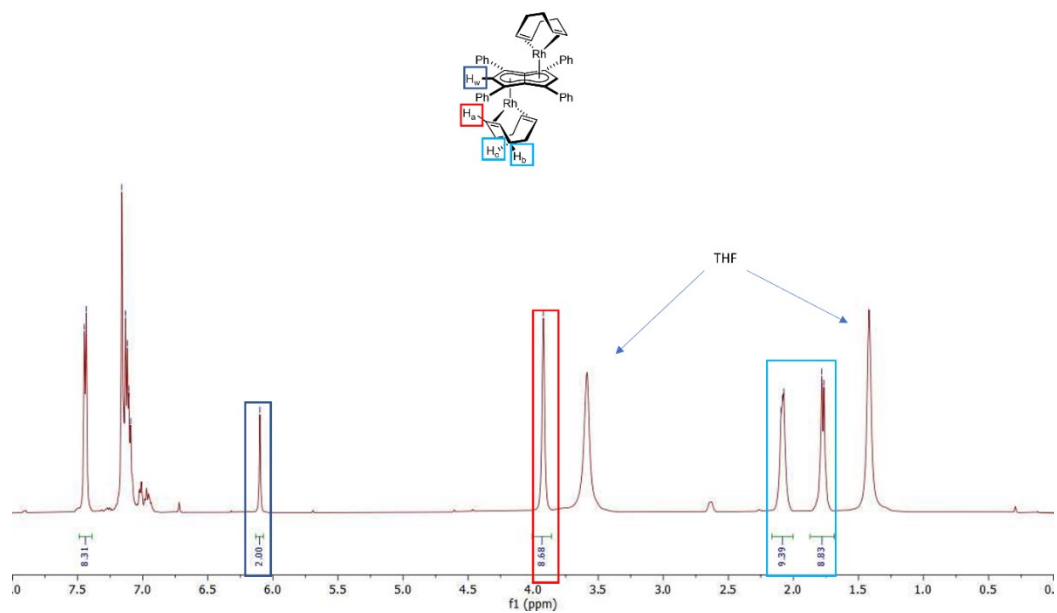

**Figure S1:** 500 MHz <sup>1</sup>H NMR spectrum of [Rh<sup>I</sup>(COD)]<sub>2</sub>[μ:η<sup>5</sup>:η<sup>5</sup>Ph<sub>4</sub>Pn] in C<sub>6</sub>D<sub>6</sub>

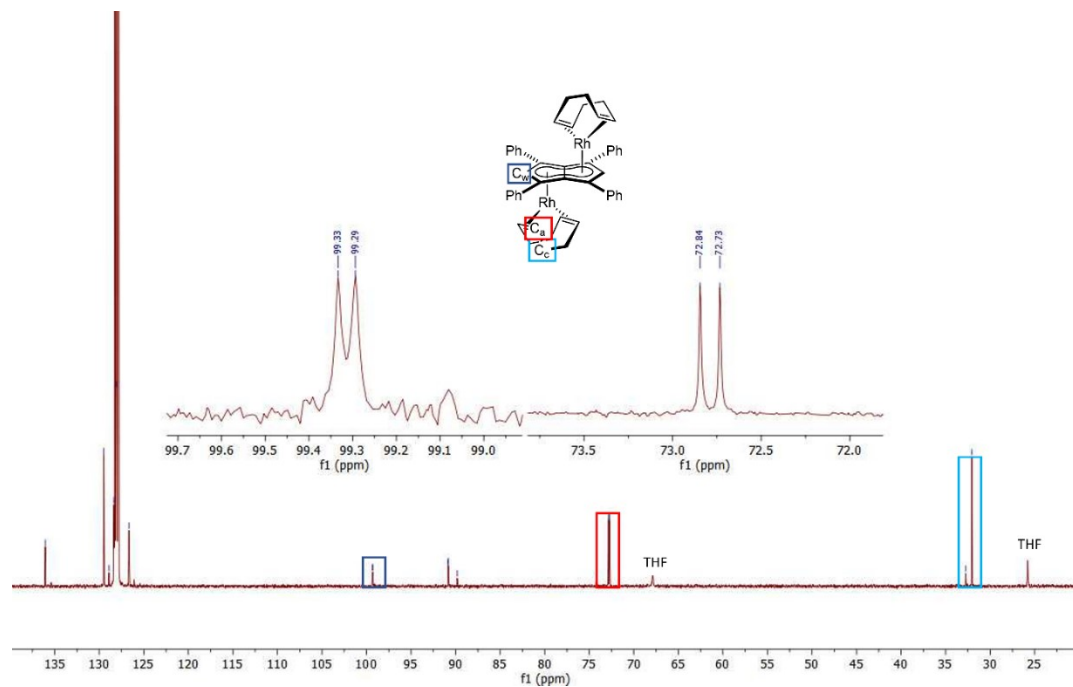

**Figure S2:** 126 MHz <sup>13</sup>C{<sup>1</sup>H} NMR spectrum of [Rh<sup>I</sup>(COD)]<sub>2</sub>[μ:η<sup>5</sup>:η<sup>5</sup>Ph<sub>4</sub>Pn] in C<sub>6</sub>D<sub>6</sub>

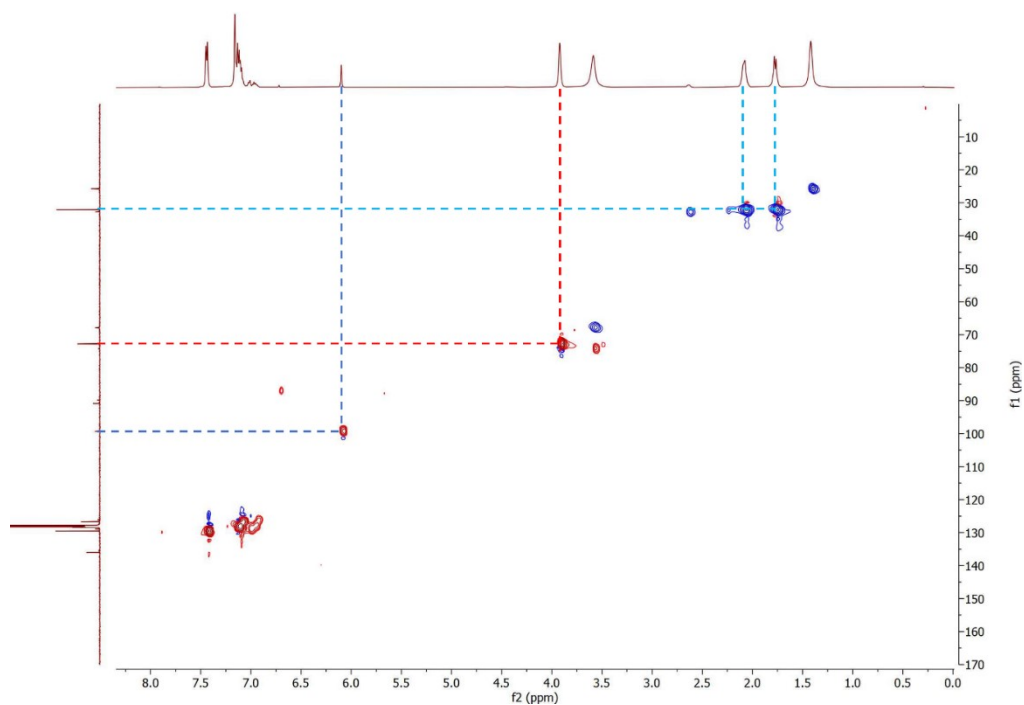

**Figure S3:** 500 MHz  $^1\text{H}$ - $^1\text{H}$  HSQC spectrum of  $[\text{Rh}^{\text{I}}(\text{COD})]_2[\mu:\eta^5:\eta^5\text{Ph}_4\text{Pn}]$  in  $\text{C}_6\text{D}_6$  (Blue =  $\text{H}_w$ , Red =  $\text{H}_a$ , Light blue =  $\text{H}_b$  and  $\text{H}_c$ )

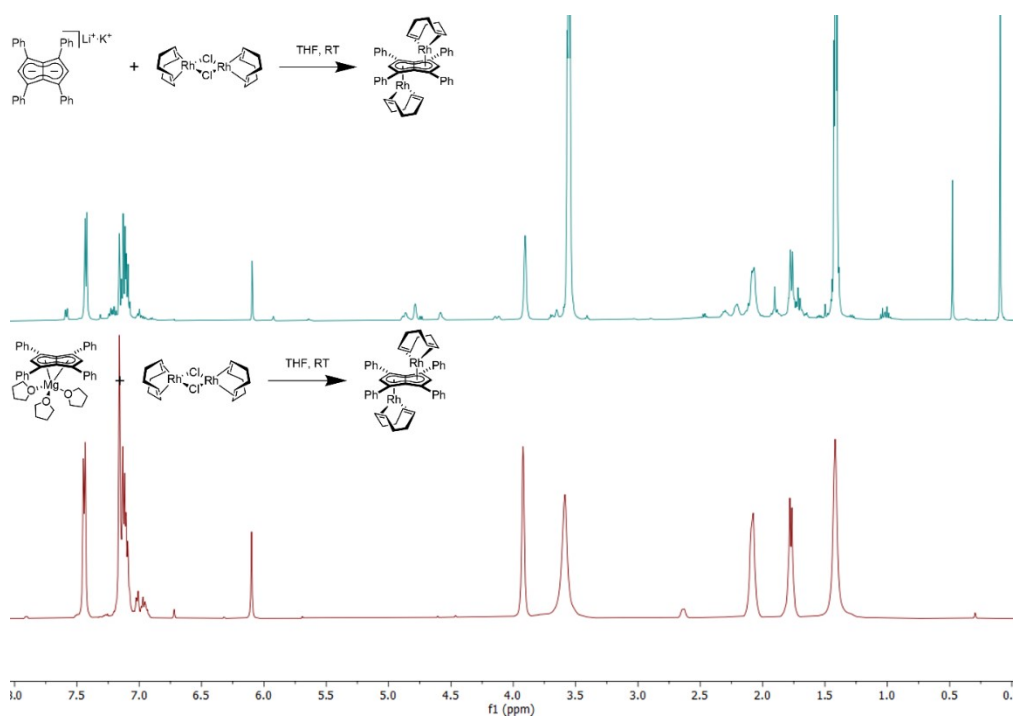

**Figure S4:** 500 MHz stacked  $^1\text{H}$  NMR spectra of  $[\text{Rh}^{\text{I}}(\text{COD})]_2[\mu:\eta^5:\eta^5\text{Ph}_4\text{Pn}]$  in  $\text{C}_6\text{D}_6$

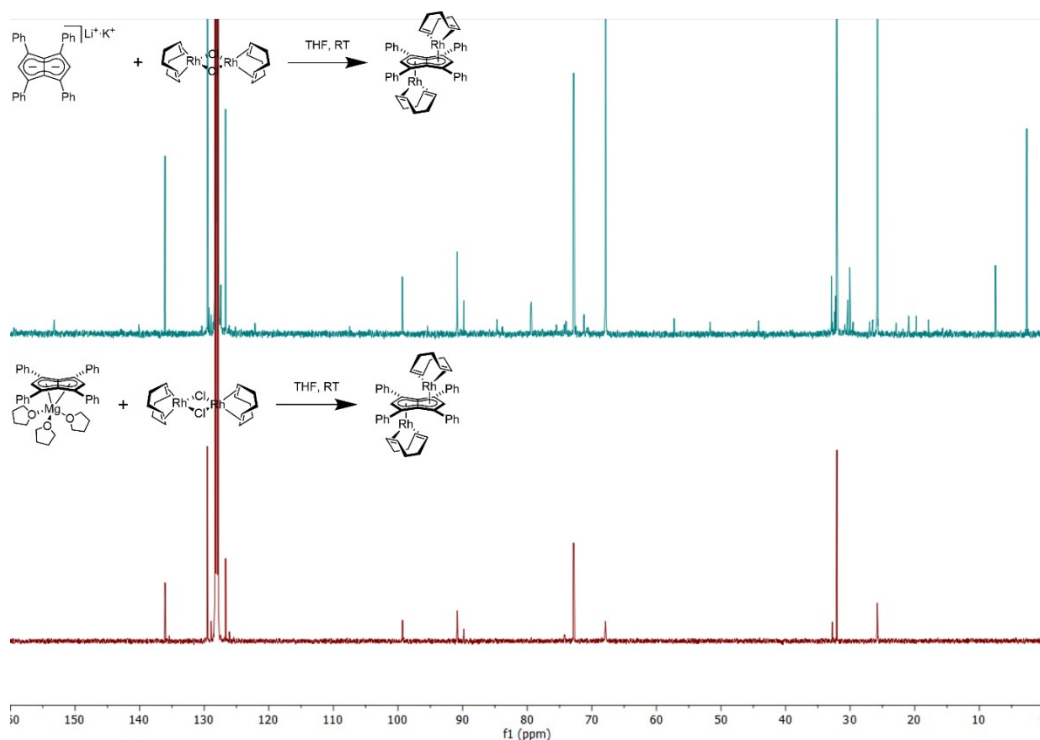

**Figure S5:** 126 MHz stacked  $^{13}\text{C}\{^1\text{H}\}$  NMR spectra of  $[\text{Rh}^{\text{I}}(\text{COD})]_2[\mu:\eta^5:\eta^5\text{Ph}_4\text{Pn}]$  in  $\text{C}_6\text{D}_6$

*Anti*- $[\text{Ir}^{\text{I}}(\text{COD})]_2[\mu:\eta^5:\eta^5\text{Ph}_4\text{Pn}]$  (**2**)

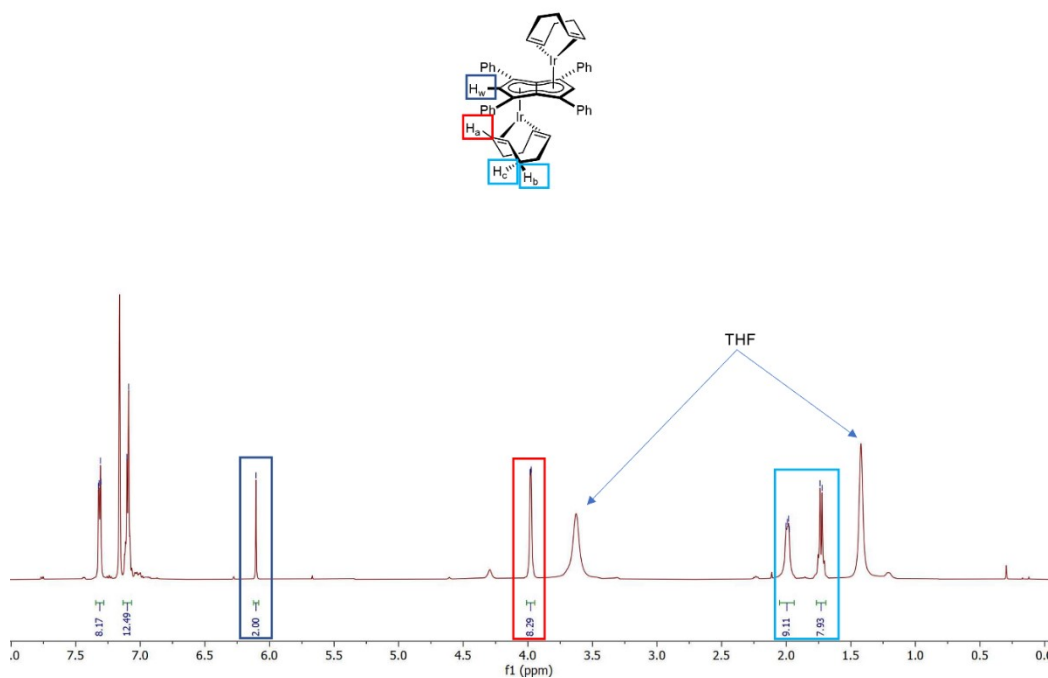

**Figure S6:** 500 MHz  $^1\text{H}$  NMR spectrum of  $[\text{Ir}^{\text{I}}(\text{COD})]_2[\mu:\eta^5:\eta^5\text{Ph}_4\text{Pn}]$  in  $\text{C}_6\text{D}_6$

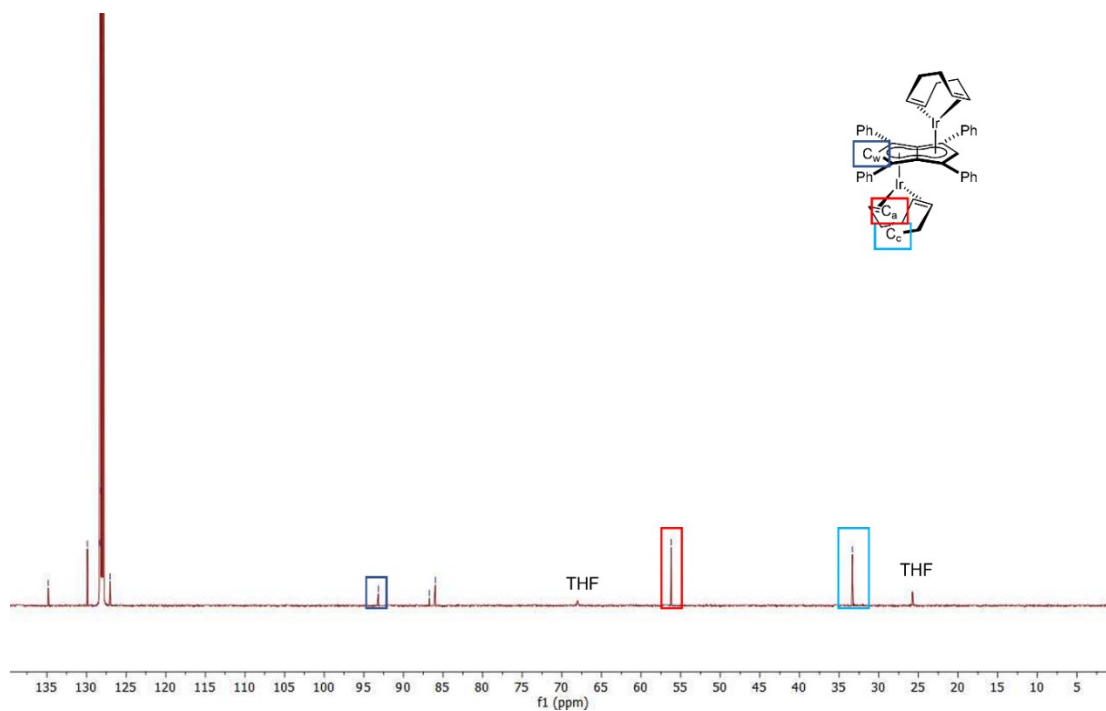

**Figure S7:** 126 MHz  $^{13}\text{C}\{^1\text{H}\}$  NMR spectrum of  $[\text{Ir}(\text{COD})]_2[\mu\text{:}\eta^5\text{:}\eta^5\text{Ph}_4\text{Pn}]$  in  $\text{C}_6\text{D}_6$

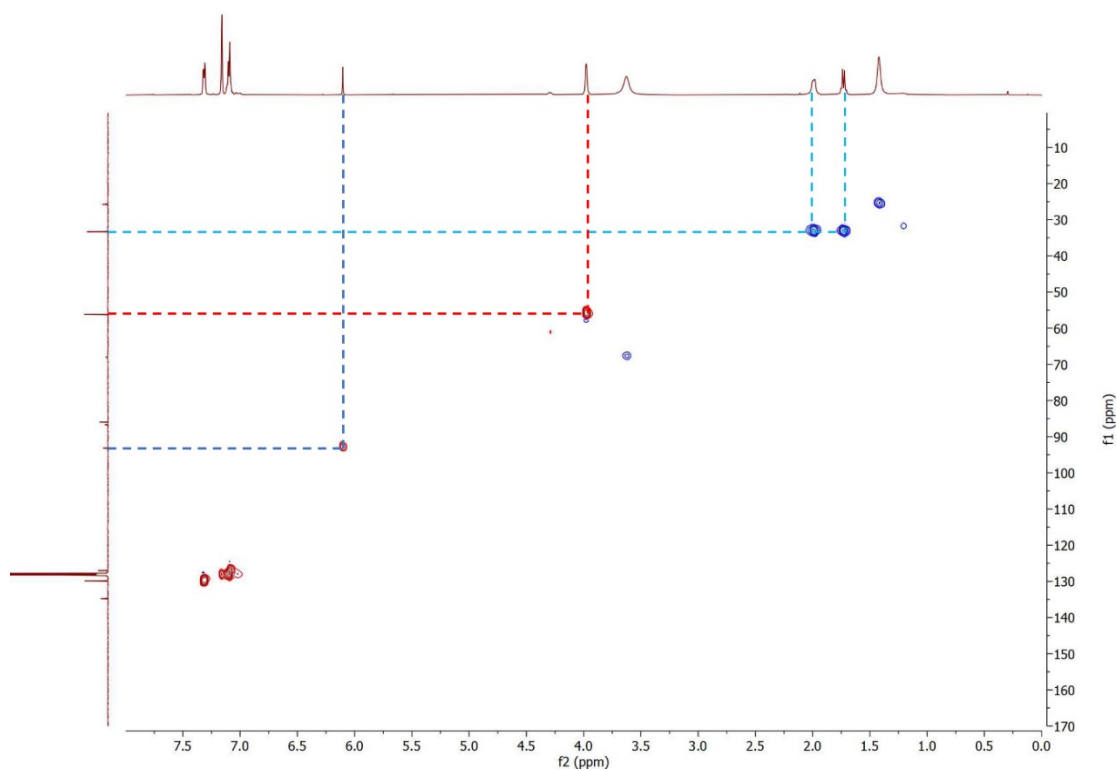

**Figure S8:** 500 MHz  $^1\text{H}\text{-}^{13}\text{C}$  HSQC spectrum of  $[\text{Ir}(\text{COD})]_2[\mu\text{:}\eta^5\text{:}\eta^5\text{Ph}_4\text{Pn}]$  in  $\text{C}_6\text{D}_6$  (Blue =  $\text{H}_w$ , Red =  $\text{H}_a$ , Light blue =  $\text{H}_b$  and  $\text{H}_c$ )

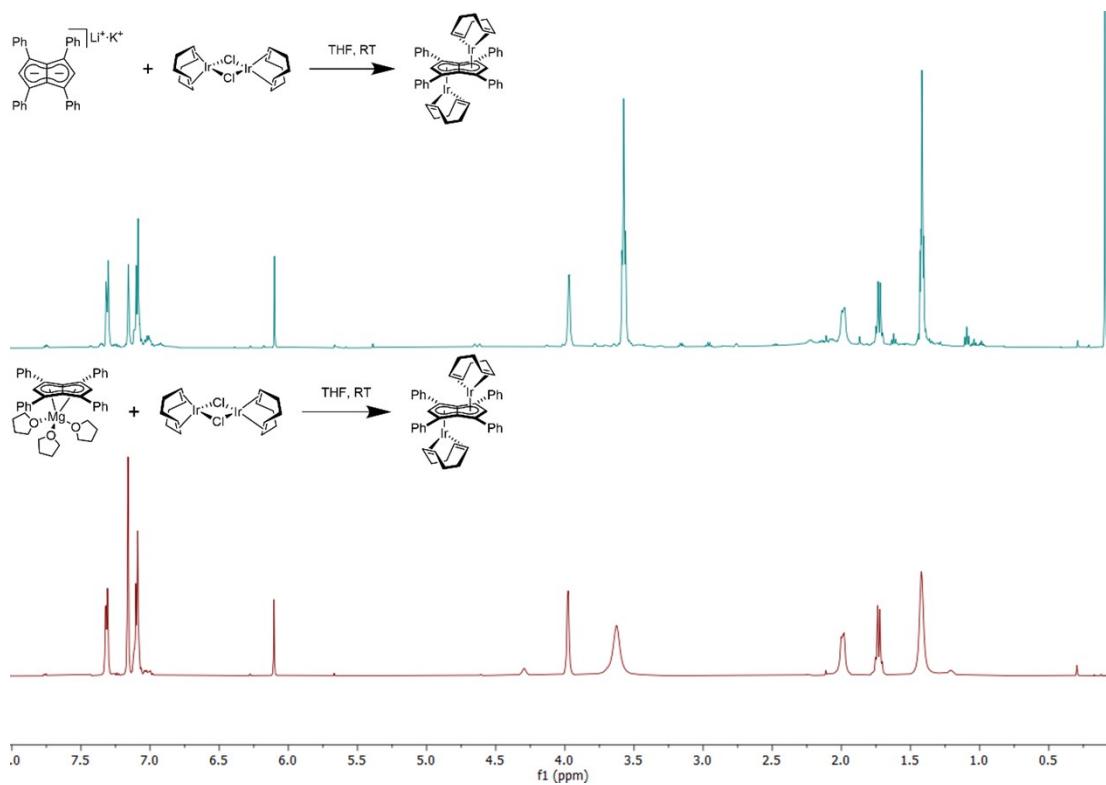

**Figure S9:** 500 MHz stacked  $^1\text{H}$  NMR spectra of  $[\text{Ir}^{\text{I}}(\text{COD})]_2[\mu:\eta^5:\eta^5\text{Ph}_4\text{Pn}]$  in  $\text{C}_6\text{D}_6$

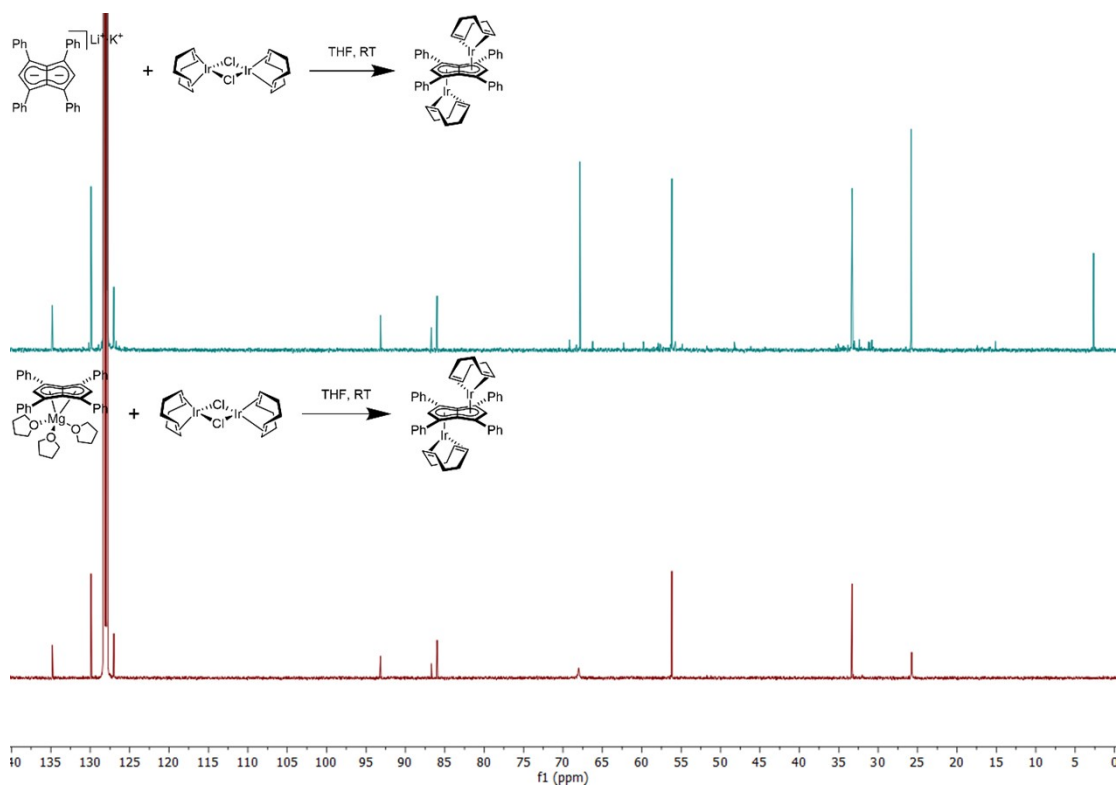

**Figure S10:** 500 MHz stacked  $^1\text{H}$  NMR spectra of  $[\text{Ir}^{\text{I}}(\text{COD})]_2[\mu:\eta^5:\eta^5\text{Ph}_4\text{Pn}]$  in  $\text{C}_6\text{D}_6$

*Anti*-[Rh<sup>I</sup>(NBD)]<sub>2</sub>[μ:η<sup>5</sup>:η<sup>5</sup>Ph<sub>4</sub>Pn] (3)

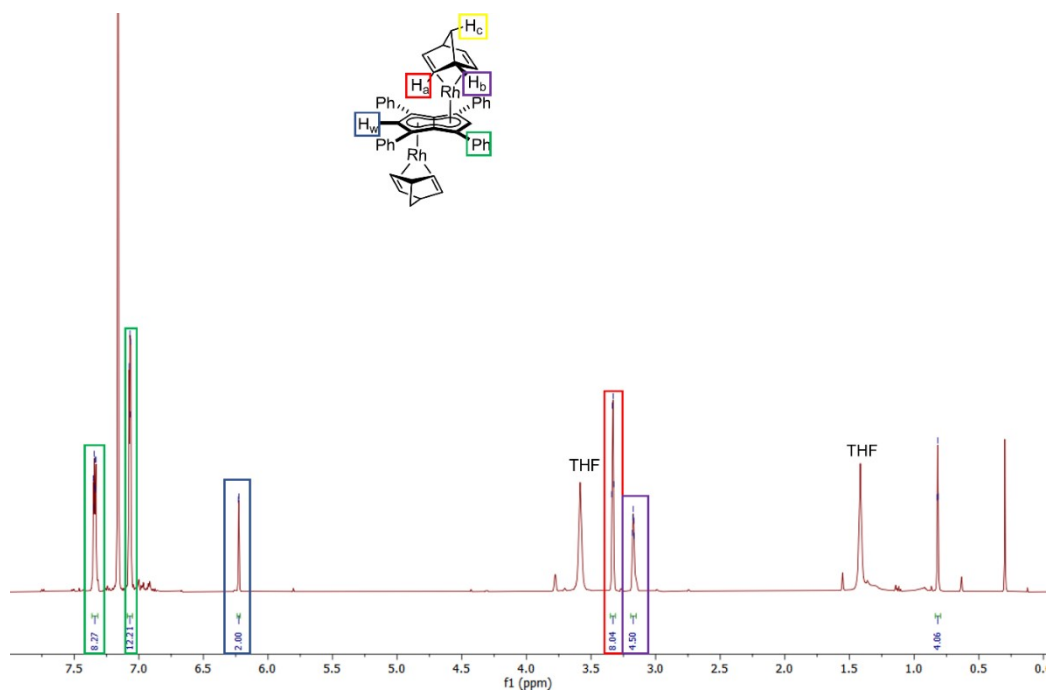

**Figure S11:** 500 MHz <sup>1</sup>H NMR spectrum of [Rh<sup>I</sup>(NBD)]<sub>2</sub>[μ:η<sup>5</sup>:η<sup>5</sup>Ph<sub>4</sub>Pn] in C<sub>6</sub>D<sub>6</sub>

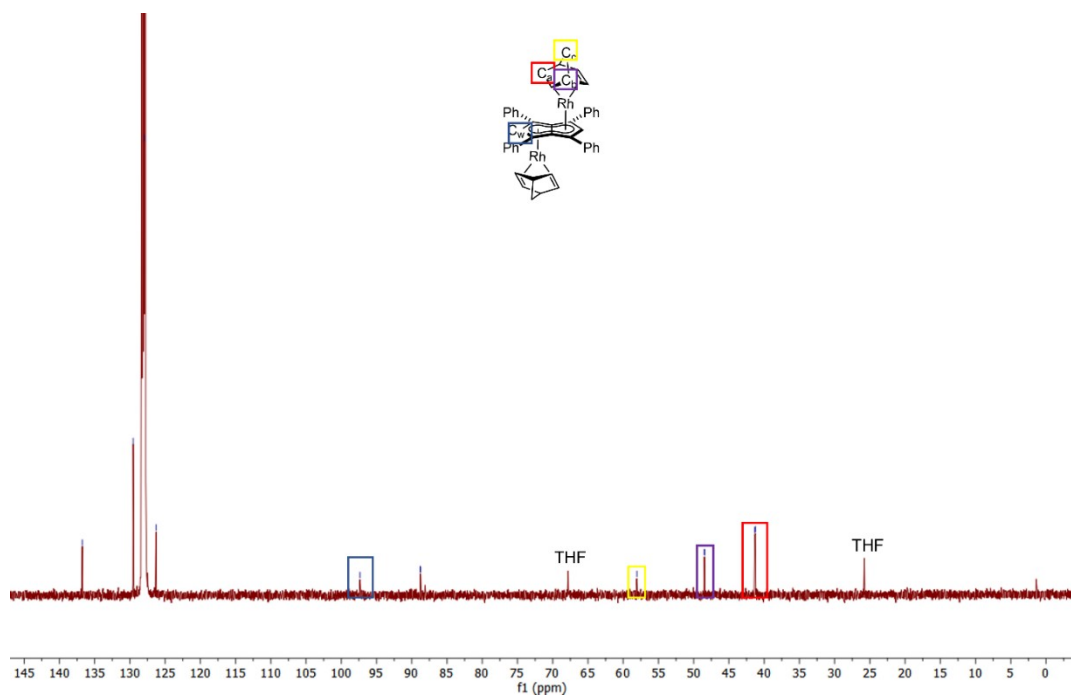

**Figure S12:** 126 MHz <sup>13</sup>C{<sup>1</sup>H} NMR spectrum of [Rh<sup>I</sup>(NBD)]<sub>2</sub>[μ:η<sup>5</sup>:η<sup>5</sup>Ph<sub>4</sub>Pn] in C<sub>6</sub>D<sub>6</sub>



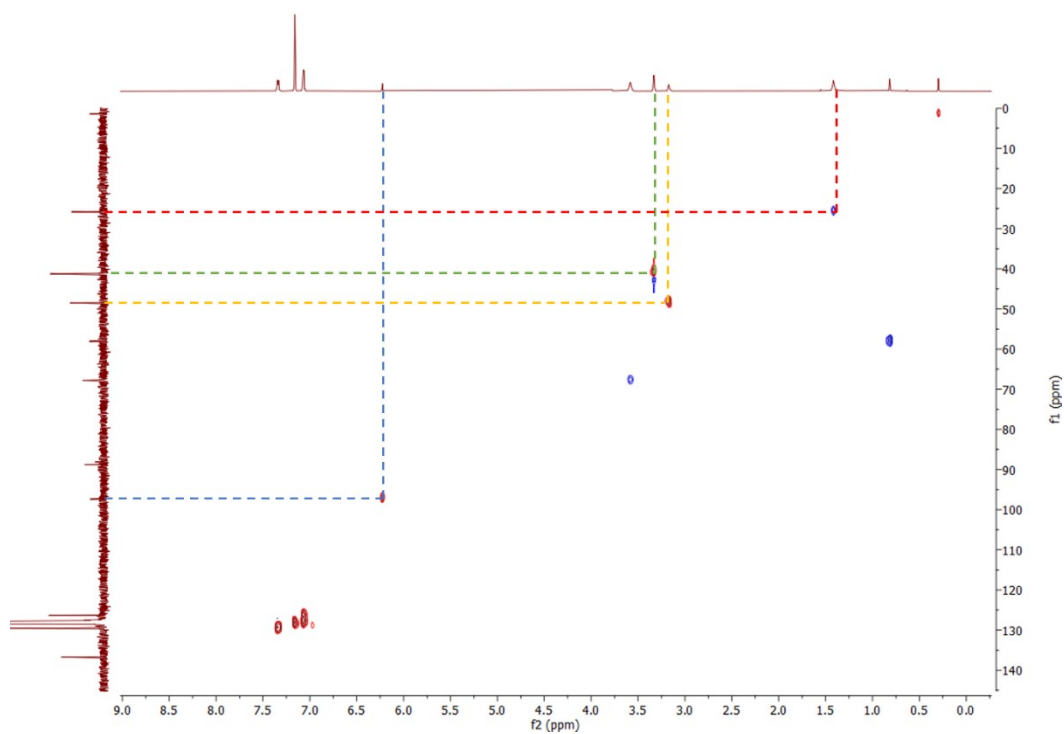

**Figure S13:** 500 MHz  $^1\text{H}$ - $^{13}\text{C}$  HSQC spectrum of  $[\text{Rh}'(\text{NBD})]_2[\mu:\eta^5:\eta^5\text{Ph}_4\text{Pn}]$  in  $\text{C}_6\text{D}_6$  (Blue =  $\text{H}_w$ , Yellow =  $\text{H}_b$ , Green =  $\text{H}_a$ , Red =  $\text{H}_c$ )

*Anti*- $[\text{Rh}'(\text{C}_2\text{H}_4)_2]_2[\mu:\eta^5:\eta^5\text{Ph}_4\text{Pn}]$  (**4**)

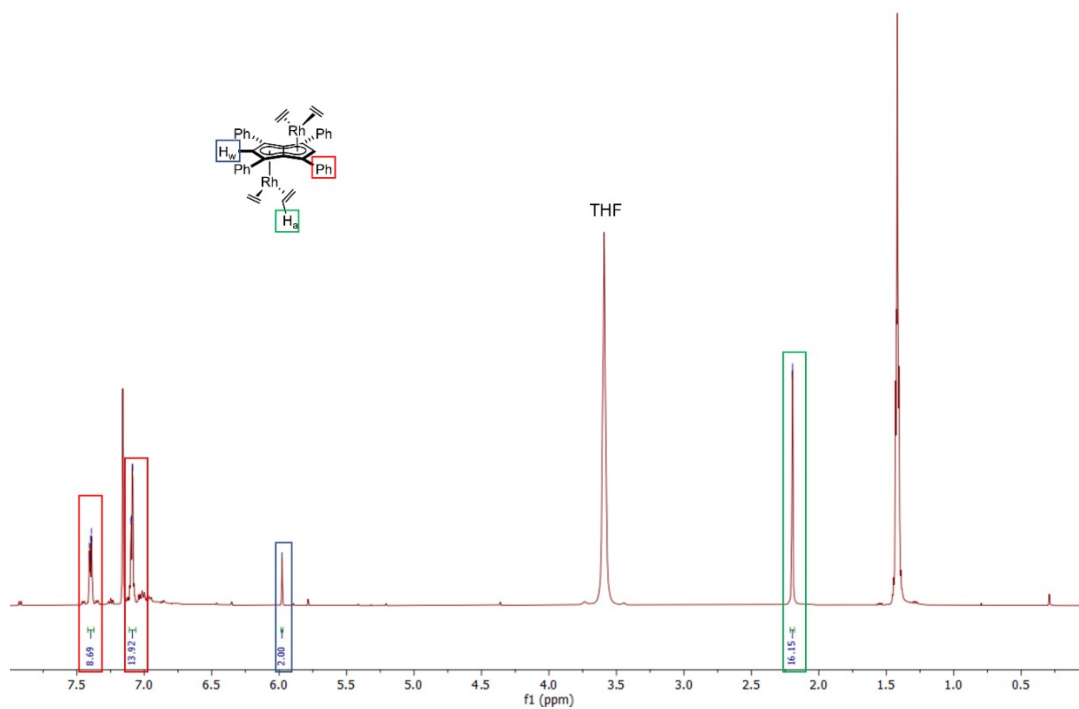

**Figure S14:** 500 MHz  $^1\text{H}$  NMR spectrum of  $[\text{Rh}'(\text{C}_2\text{H}_4)_2]_2[\mu:\eta^5:\eta^5\text{Ph}_4\text{Pn}]$  in  $\text{C}_6\text{D}_6$

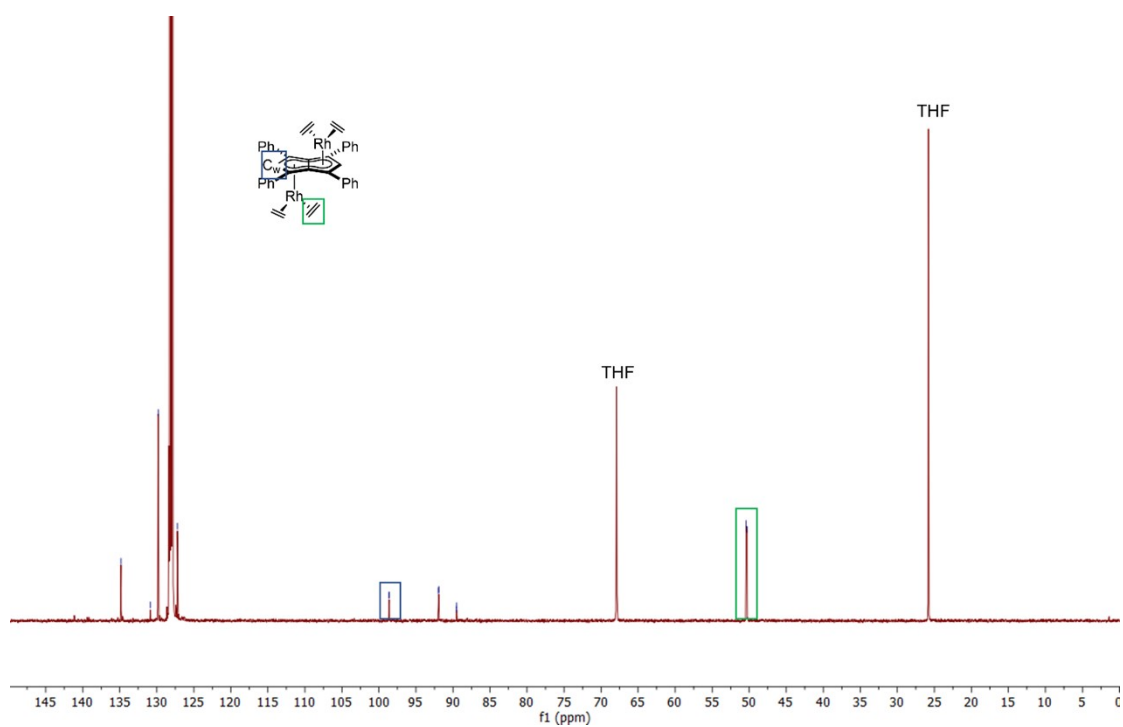

**Figure S15** 126 MHz  $^{13}\text{C}\{^1\text{H}\}$  NMR spectrum of  $[\text{Rh}'(\text{C}_2\text{H}_4)_2][\mu:\eta^5:\eta^5\text{Ph}_4\text{Pn}]$  in  $\text{C}_6\text{D}_6$

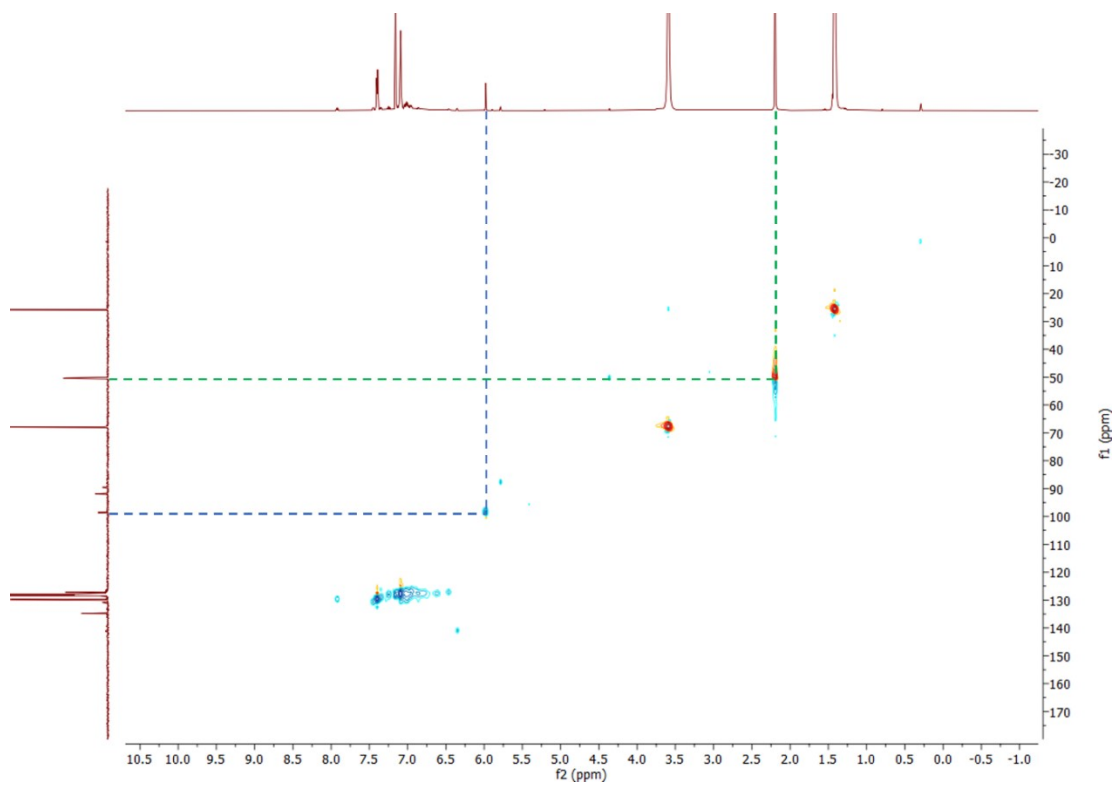

**Figure S16:** 500 MHz  $^1\text{H}-^{13}\text{C}$  HSQC spectrum of  $[\text{Rh}'(\text{C}_2\text{H}_4)_2][\mu:\eta^5:\eta^5\text{Ph}_4\text{Pn}]$  in  $\text{C}_6\text{D}_6$  (Blue =  $\text{H}_w$ , Green =  $\text{CH}_2$ )

*Syn*-[Rh<sup>I</sup>(CO)<sub>2</sub>]<sub>2</sub>[μ:η<sup>5</sup>:η<sup>5</sup>Ph<sub>4</sub>Pn] (5)

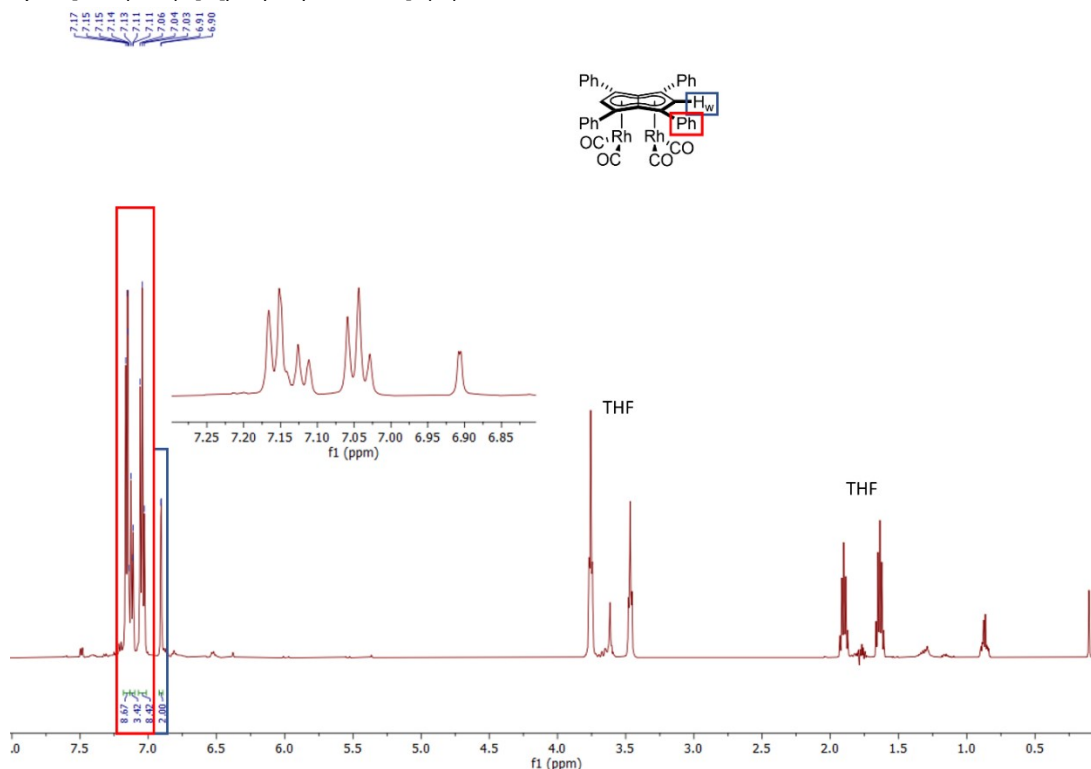

**Figure S17:** 500 MHz <sup>1</sup>H NMR spectrum of [Rh<sup>I</sup>(CO)<sub>2</sub>]<sub>2</sub>[μ:η<sup>5</sup>:η<sup>5</sup>Ph<sub>4</sub>Pn] in THF-H<sub>8</sub>. Spectrum obtained using the lc1gppnf2 solvent suppression pulse sequence, a double presaturation experiment during relaxation and mixing time using two independent channels.

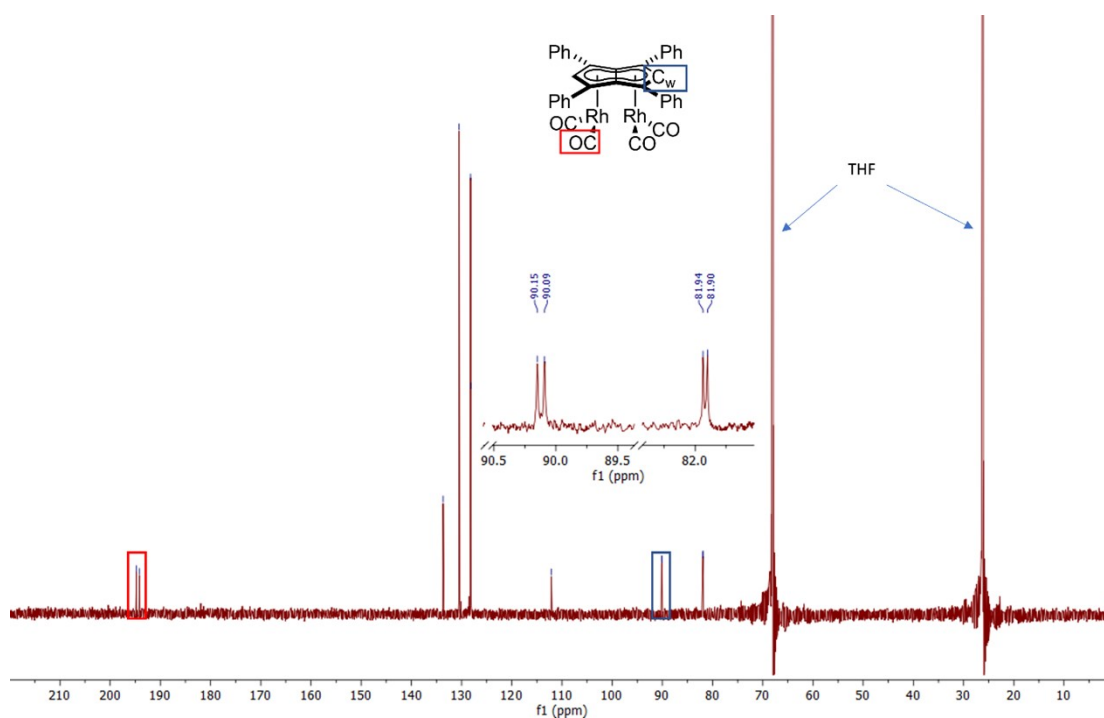

**Figure S18:** 126 MHz <sup>13</sup>C{<sup>1</sup>H} NMR spectrum of [Rh<sup>I</sup>(CO)<sub>2</sub>]<sub>2</sub>[μ:η<sup>5</sup>:η<sup>5</sup>Ph<sub>4</sub>Pn] in THF-H<sub>8</sub>

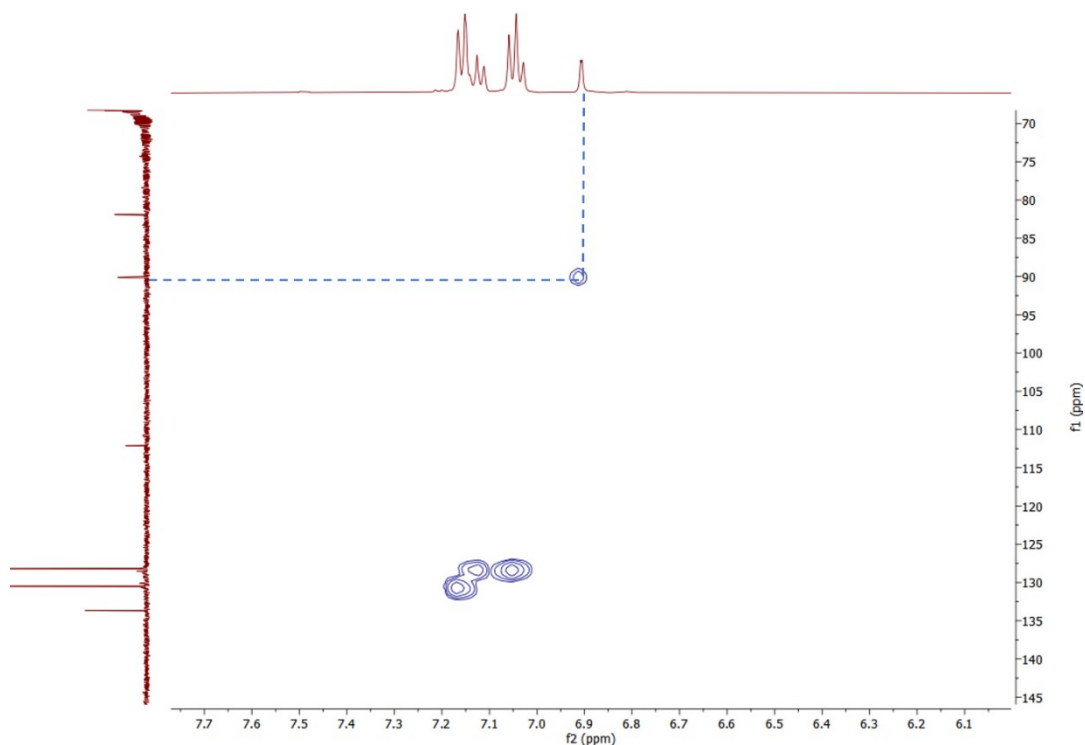

**Figure S19:** 500 MHz  $^1\text{H}$ - $^{13}\text{C}$  HSQC spectrum of  $[\text{Rh}(\text{CO})_2]_2[\mu:\eta^5:\eta^5\text{Ph}_4\text{Pn}]$  in  $\text{THF-H}_8$  (Blue =  $\text{H}_w$ )

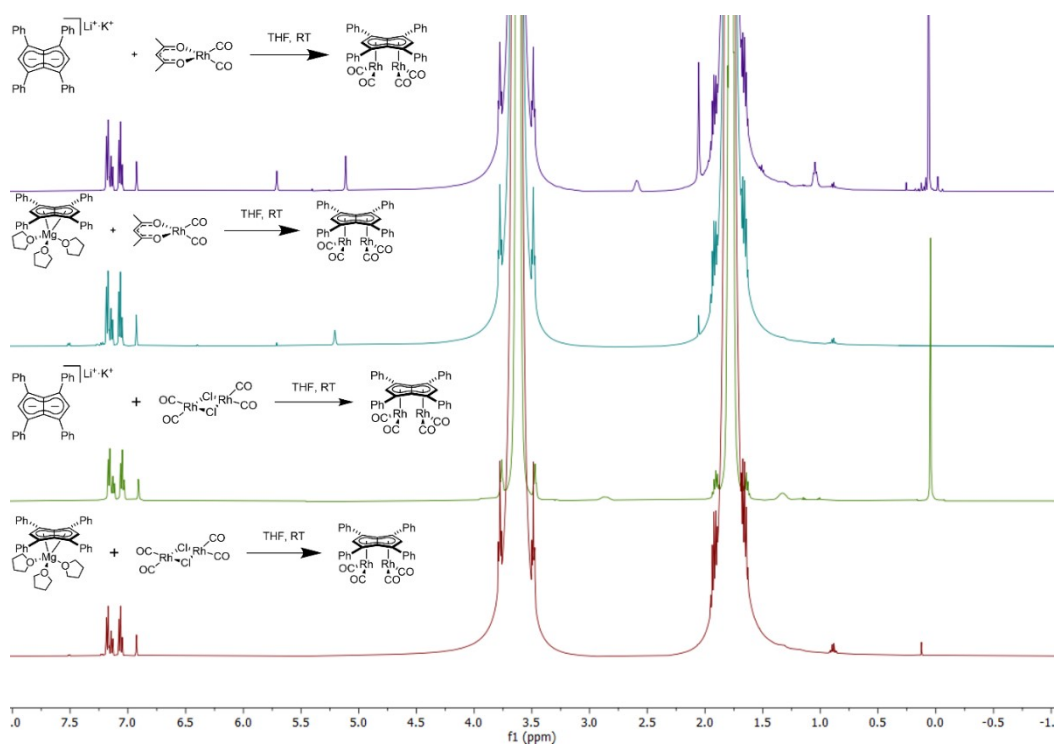

**Figure S20:** 500 MHz stacked  $^1\text{H}$  NMR spectra of alternative  $[\text{Rh}(\text{CO})_2]_2[\mu:\eta^5:\eta^5\text{Ph}_4\text{Pn}]$  syntheses in  $\text{THF-H}_8$

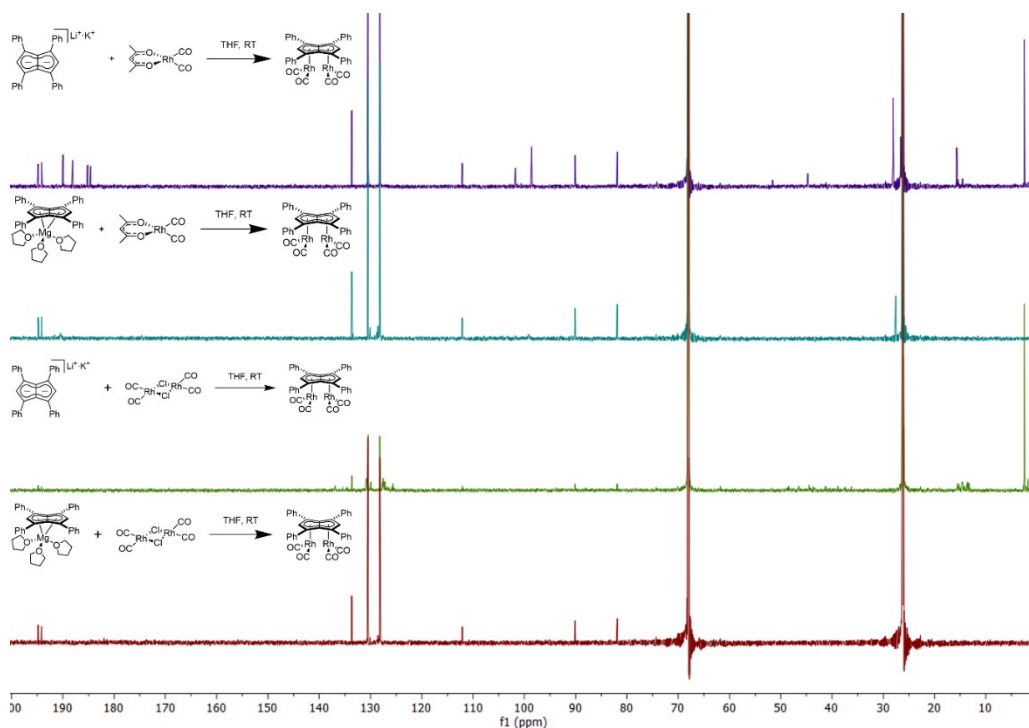

**Figure S21:** 126 MHz stacked  $^{13}\text{C}\{^1\text{H}\}$  NMR spectra of alternative  $[\text{Rh}^{\text{I}}(\text{CO})_2]_2[\mu:\eta^5:\eta^5\text{Ph}_4\text{Pn}]$  syntheses in  $\text{THF-H}_8$

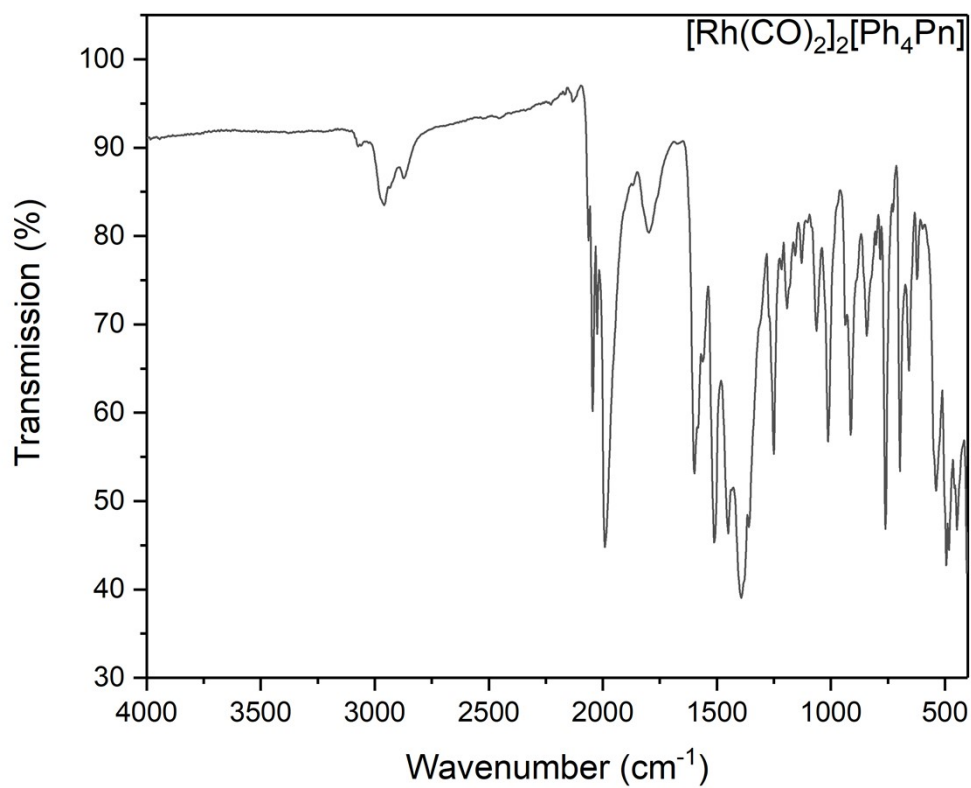

**Figure S22:** ATR-IR spectrum of solid  $[\text{Rh}^{\text{I}}(\text{CO})_2]_2[\mu:\eta^5:\eta^5\text{Ph}_4\text{Pn}]$

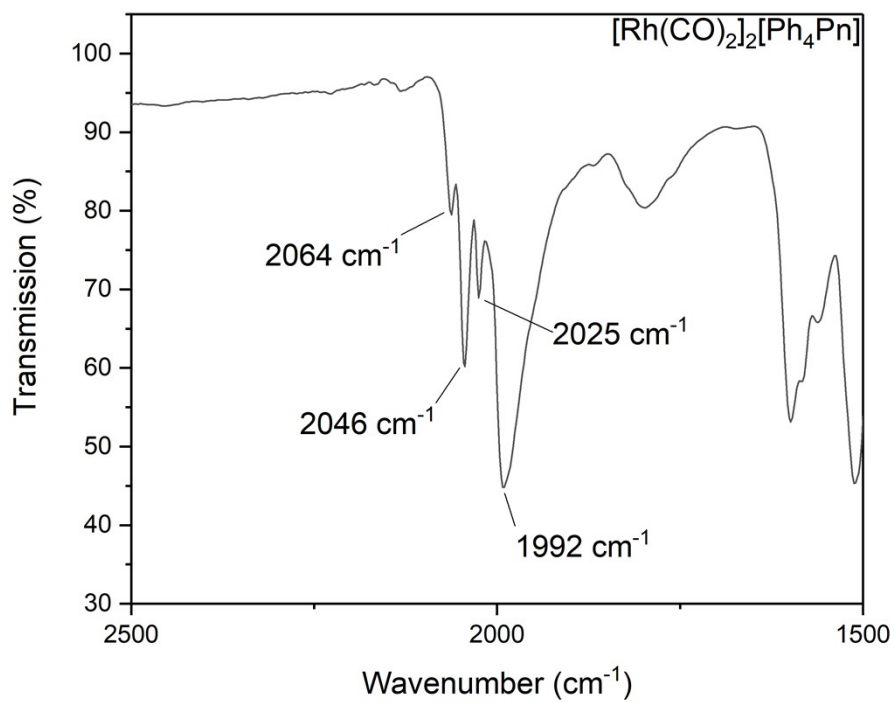

**Figure S23:** ATR-IR spectrum of solid  $[\text{Rh}(\text{CO})_2]_2[\mu\text{:}\eta^5\text{:}\eta^5\text{Ph}_4\text{Pn}]$  (expanded CO region)

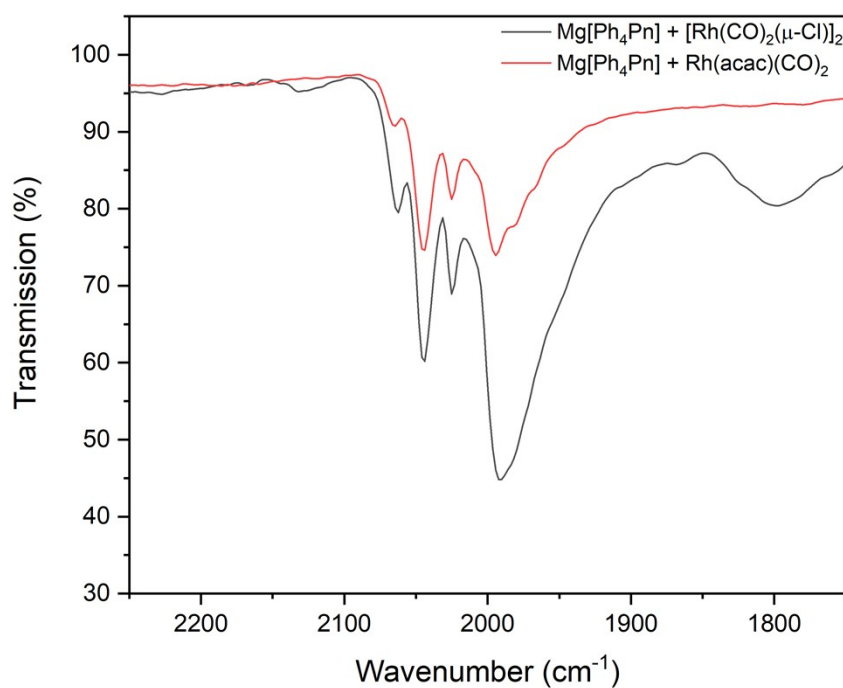

**Figure S24:** ATR-IR spectra of solid  $[\text{Rh}(\text{CO})_2]_2[\mu\text{:}\eta^5\text{:}\eta^5\text{Ph}_4\text{Pn}]$  from alternative syntheses

UV-vis spectra of **1**, **5** and  $(\text{Ph}_2\text{Cp})\text{Rh}(\text{CO})_2$

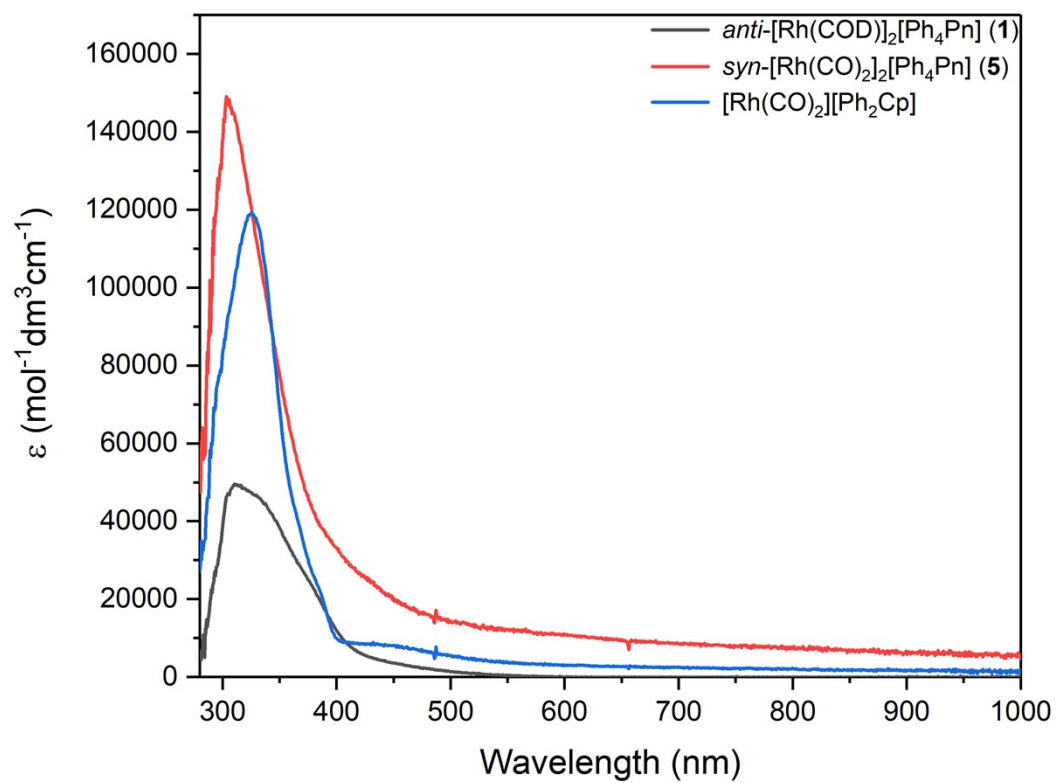

**Figure S25:** UV-vis spectra of  $[\text{Rh}(\text{COD})]_2[\text{Ph}_4\text{Pn}]$  ( $1.5 \times 10^{-6}$  M),  $[\text{Rh}(\text{CO})_2]_2[\text{Ph}_4\text{Pn}]$  ( $1.5 \times 10^{-6}$  M) and  $(\text{Ph}_2\text{Cp})\text{Rh}(\text{CO})_2$  ( $6.6 \times 10^{-6}$  M) recorded in THF at 298K

Attempted reaction of **5** with 2,2'-bipyridine

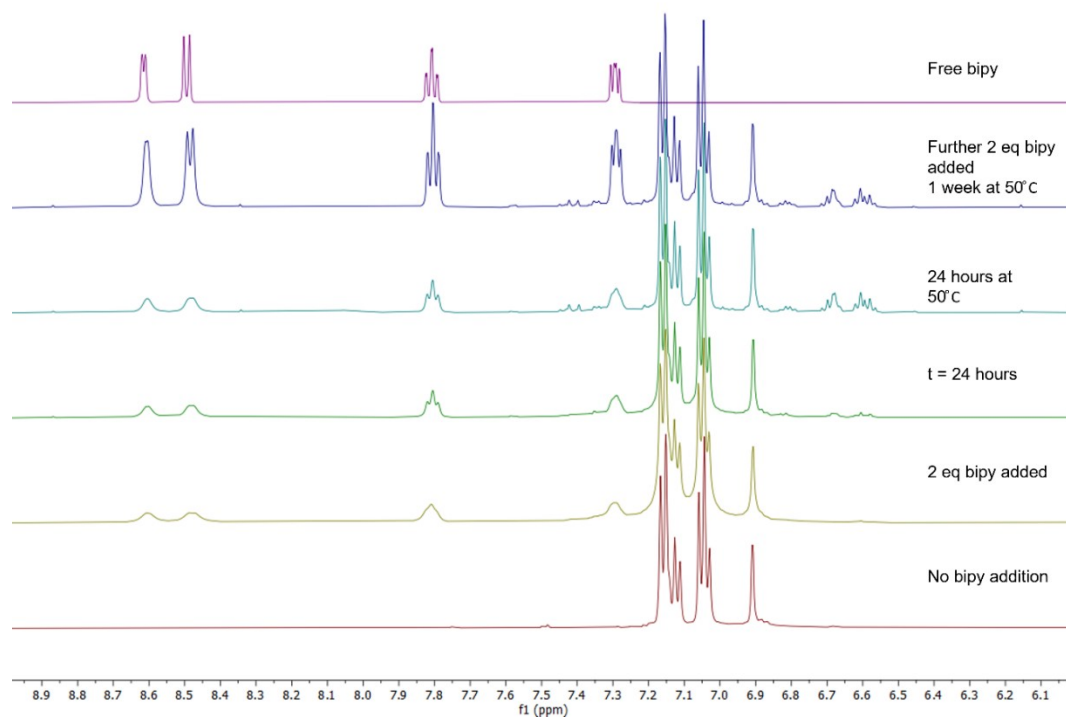

**Figure S26:** 500 MHz  $^1\text{H}$  NMR spectra of attempted substitution of  $[\text{Rh}(\text{CO})_2]_2[\mu:\eta^5:\eta^5\text{Ph}_4\text{Pn}]$  with 2,2'-bipyridine in  $\text{THF-H}_8$

Attempted reaction of **5** with pyridine

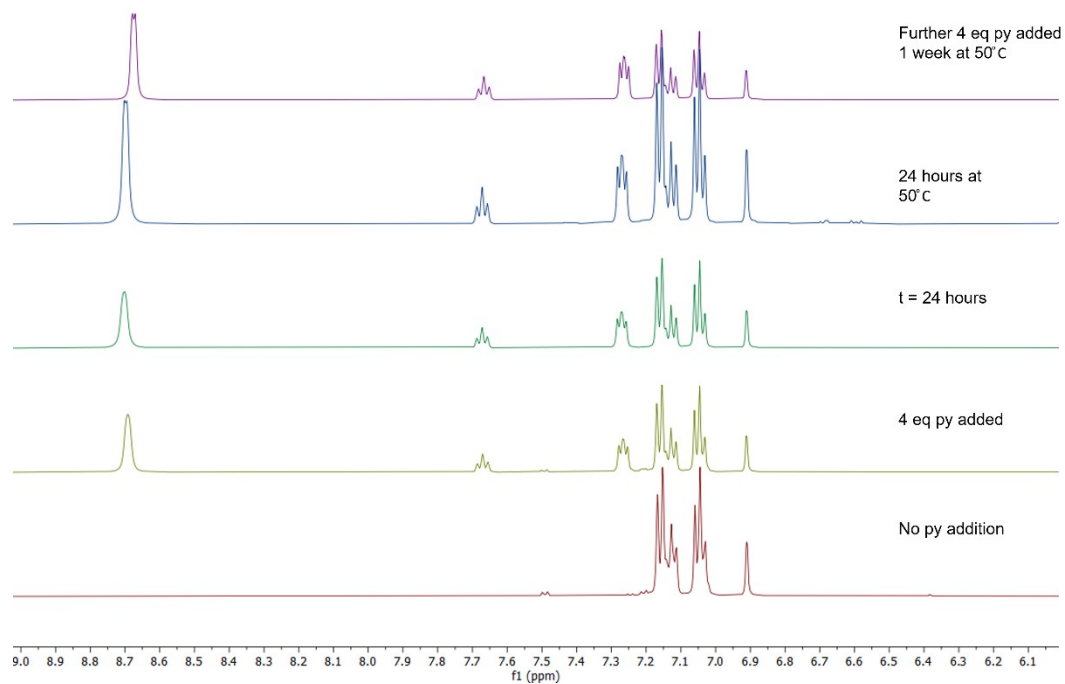

**Figure S27:** 500 MHz  $^1\text{H}$  NMR spectra of attempted substitution of  $[\text{Rh}(\text{CO})_2]_2[\mu:\eta^5:\eta^5\text{Ph}_4\text{Pn}]$  with pyridine in  $\text{THF-H}_8$



## Substitution of 5 with Triphenylphosphine

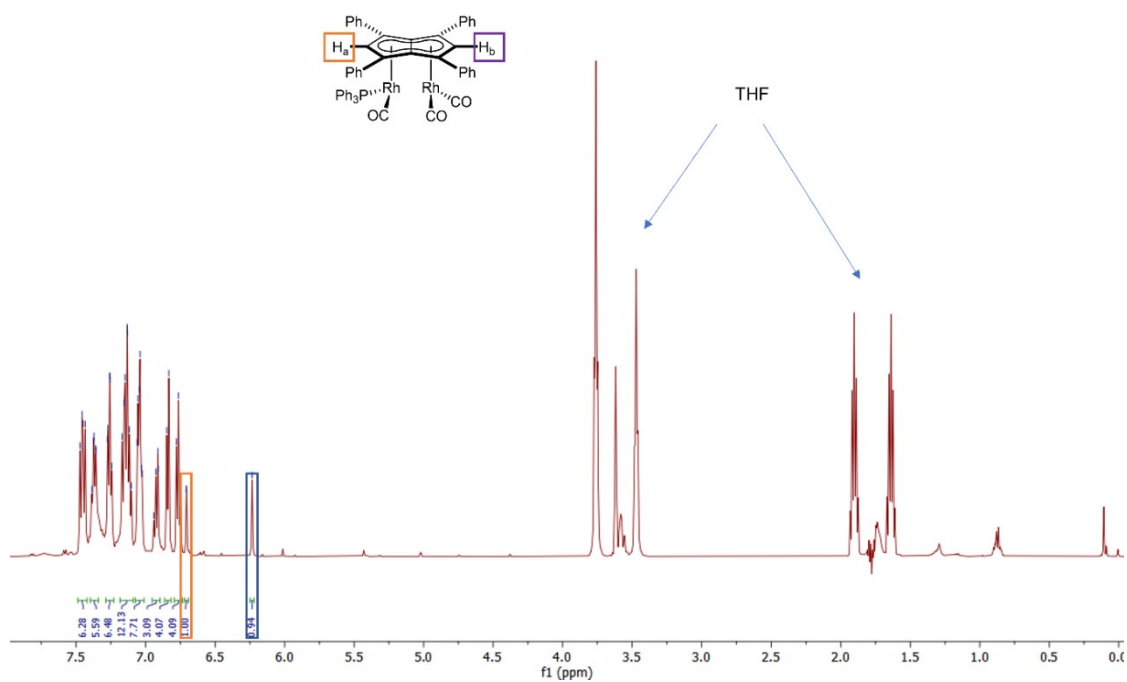

**Figure S28:** 500 MHz  $^1\text{H}$  NMR spectrum of *in-situ* formed  $[\text{Rh}'(\text{CO})_2\text{Rh}(\text{CO})(\text{PPh}_3)][\mu:\eta^5:\eta^5\text{Ph}_4\text{Pn}]$  in  $\text{THF-H}_8$ . Spectrum obtained using the  $\text{Ic1gppnf2}$  solvent suppression pulse sequence, a double presaturation experiment during relaxation and mixing time using two independent channels.

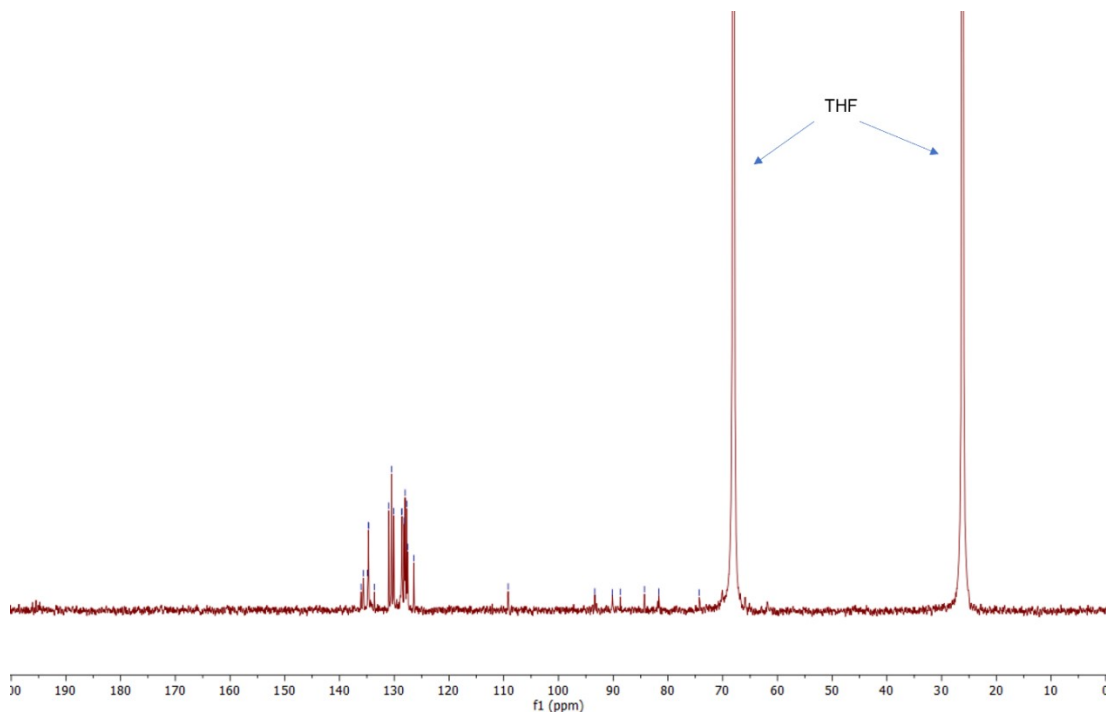

**Figure S29:** 126 MHz  $^{13}\text{C}\{^1\text{H}\}$  NMR spectrum of *in-situ* formed  $[\text{Rh}'(\text{CO})_2\text{Rh}(\text{CO})(\text{PPh}_3)][\mu:\eta^5:\eta^5\text{Ph}_4\text{Pn}]$  in  $\text{THF-H}_8$

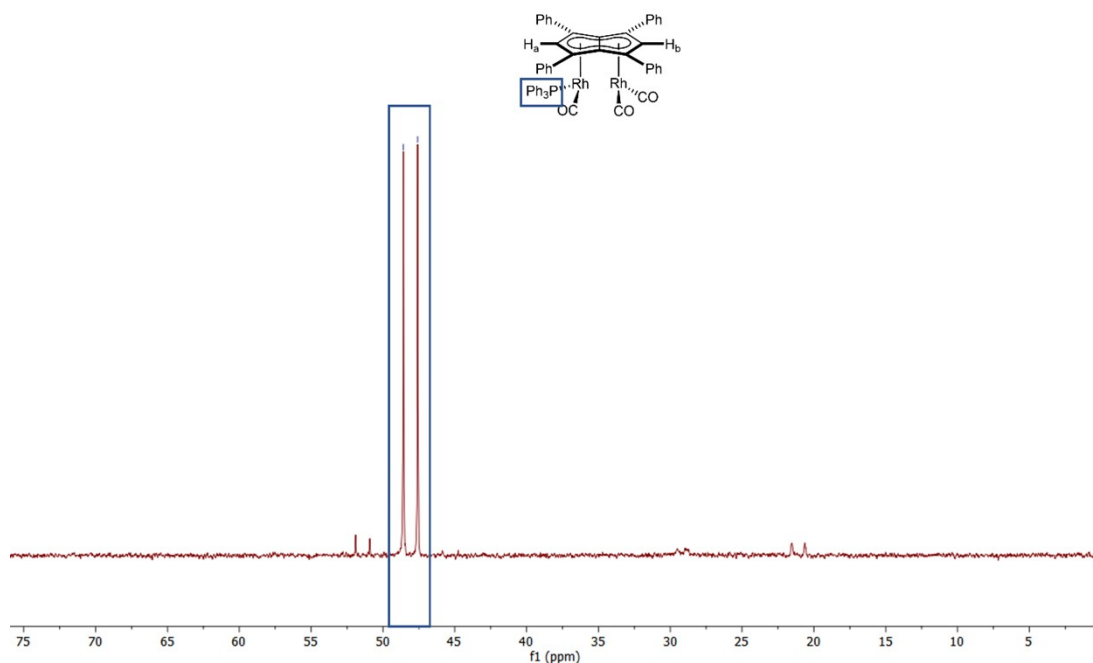

**Figure S30:** 202 MHz  $^{31}\text{P}\{^1\text{H}\}$  NMR spectrum of *in-situ* formed  $[\text{Rh}'(\text{CO})_2;\text{Rh}'(\text{CO})(\text{PPh}_3)][\mu:\eta^5:\eta^5\text{Ph}_4\text{Pn}]$  in  $\text{THF-H}_8$

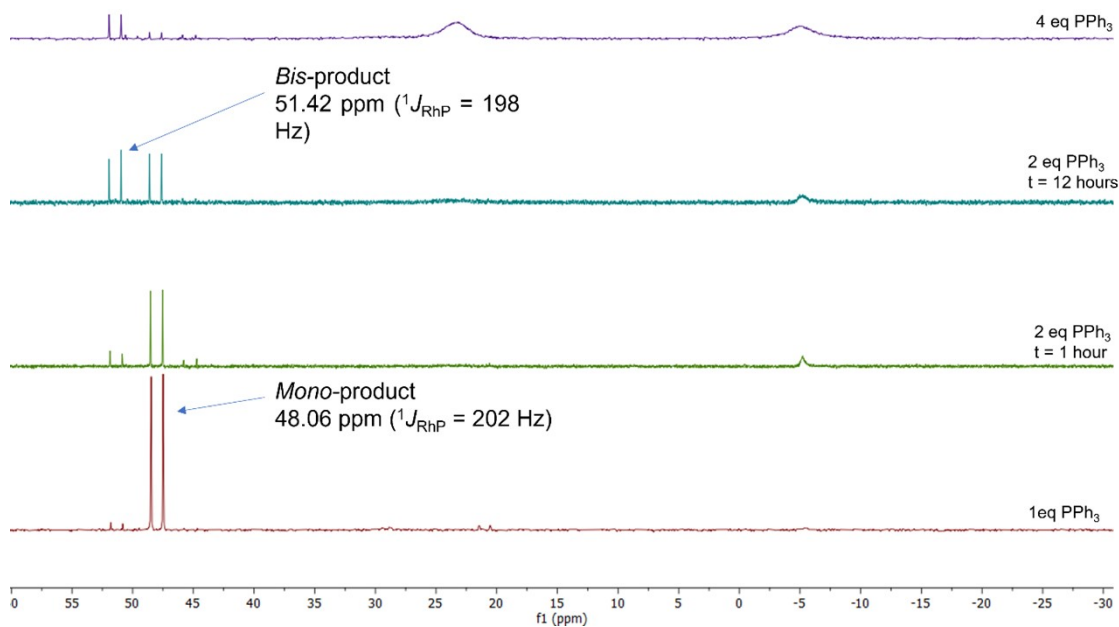

**Figure S31:** 202 MHz  $^{31}\text{P}\{^1\text{H}\}$  NMR spectra of varying equivalents of  $\text{PPh}_3$  added to  $[\text{Rh}'(\text{CO})_2]_2[\mu:\eta^5:\eta^5\text{Ph}_4\text{Pn}]$  in  $\text{THF-H}_8$

## Substitution of **5** with Trimethylphosphine

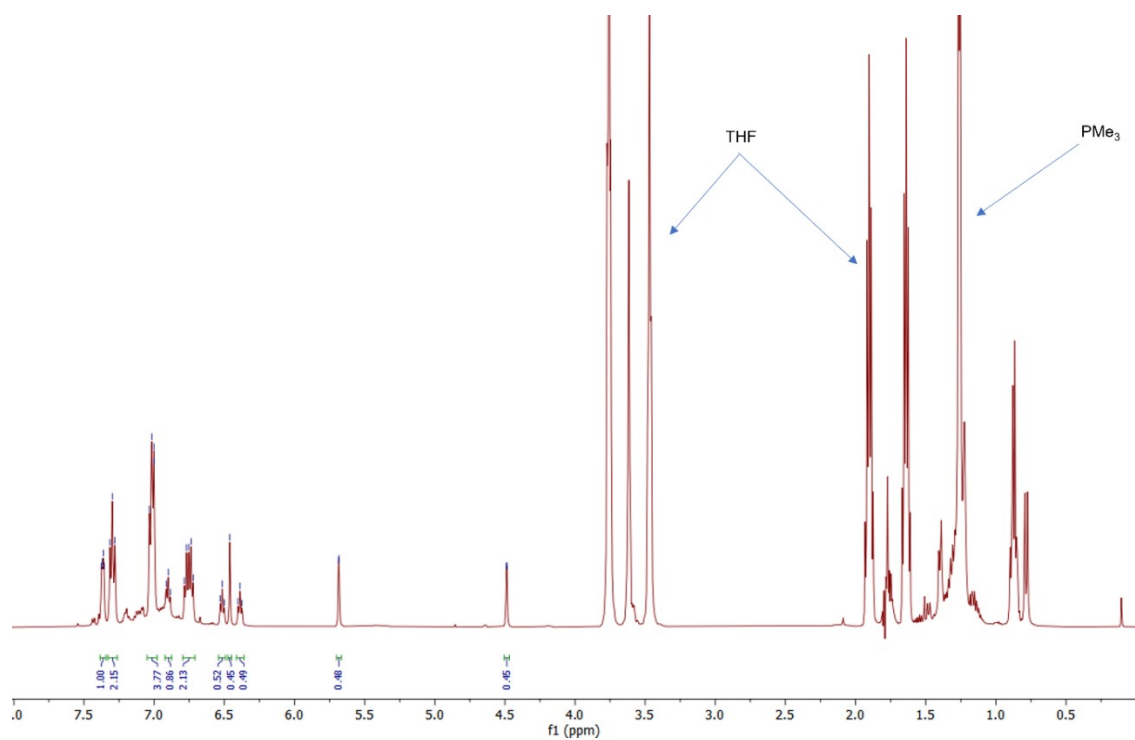

**Figure S32:** 500 MHz <sup>1</sup>H NMR spectrum of four equivalents PMe<sub>3</sub> added to [Rh'(CO)<sub>2</sub>]<sub>2</sub>[μ:η<sup>5</sup>:η<sup>5</sup>Ph<sub>4</sub>Pn] in THF-H<sub>8</sub>. Spectrum obtained using the lc1gppnf2 solvent suppression pulse sequence, a double presaturation experiment during relaxation and mixing time using two independent channels.

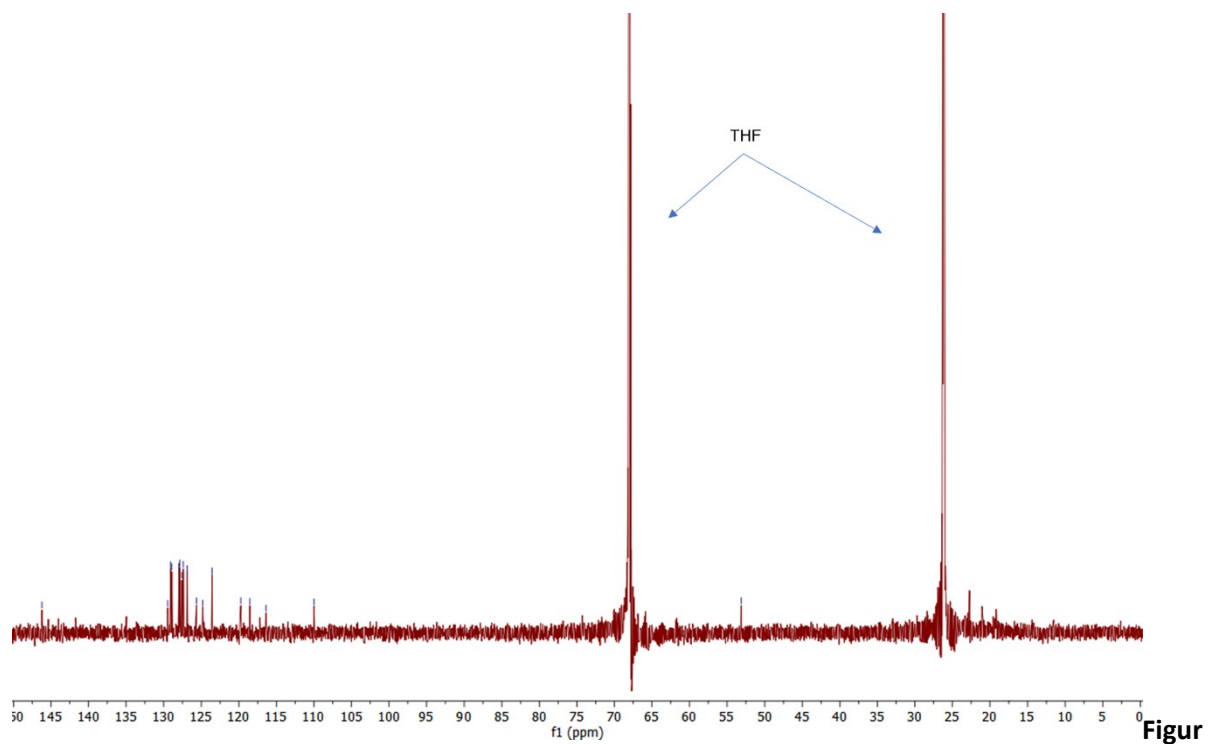

**e S33:** 126 MHz  $^{13}\text{C}\{^1\text{H}\}$  NMR spectrum of four equivalents  $\text{PMe}_3$  added to  $[\text{Rh}^{\text{I}}(\text{CO})_2]_2[\mu:\eta^5:\eta^5\text{Ph}_4\text{Pn}]$  in  $\text{THF-H}_8$

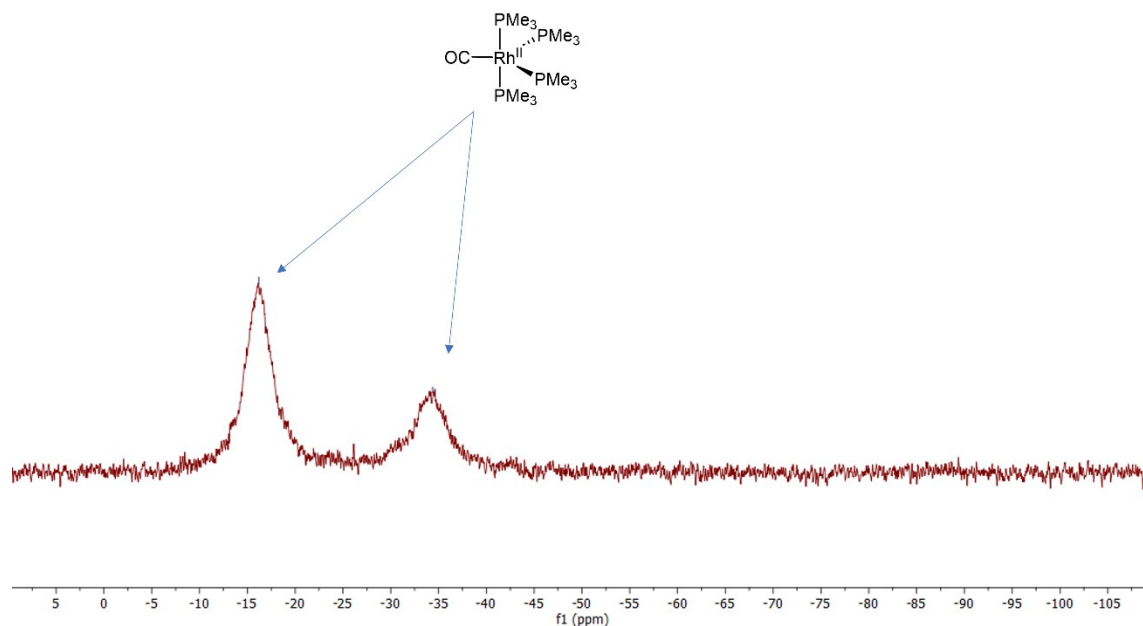

**Figure S34:** 202 MHz  $^{31}\text{P}\{^1\text{H}\}$  NMR spectrum of four equivalents  $\text{PMe}_3$  added to  $[\text{Rh}^{\text{I}}(\text{CO})_2]_2[\mu:\eta^5:\eta^5\text{Ph}_4\text{Pn}]$  in  $\text{THF-H}_8$

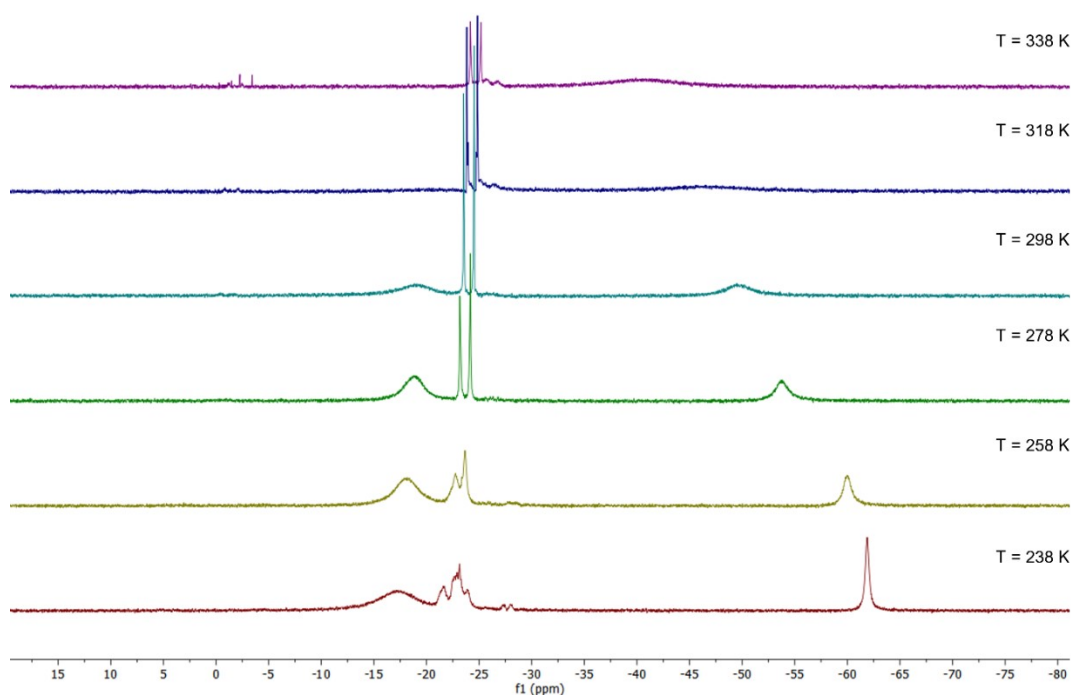

**Figure S35:** 162 MHz  $^{31}\text{P}\{^1\text{H}\}$  variable temperature NMR spectra of four equivalents  $\text{PMe}_3$  added to  $[\text{Rh}^{\text{I}}(\text{CO})_2]_2[\mu\text{:}\eta^5\text{:}\eta^5\text{Ph}_4\text{Pn}]$  in  $\text{THF-H}_8$

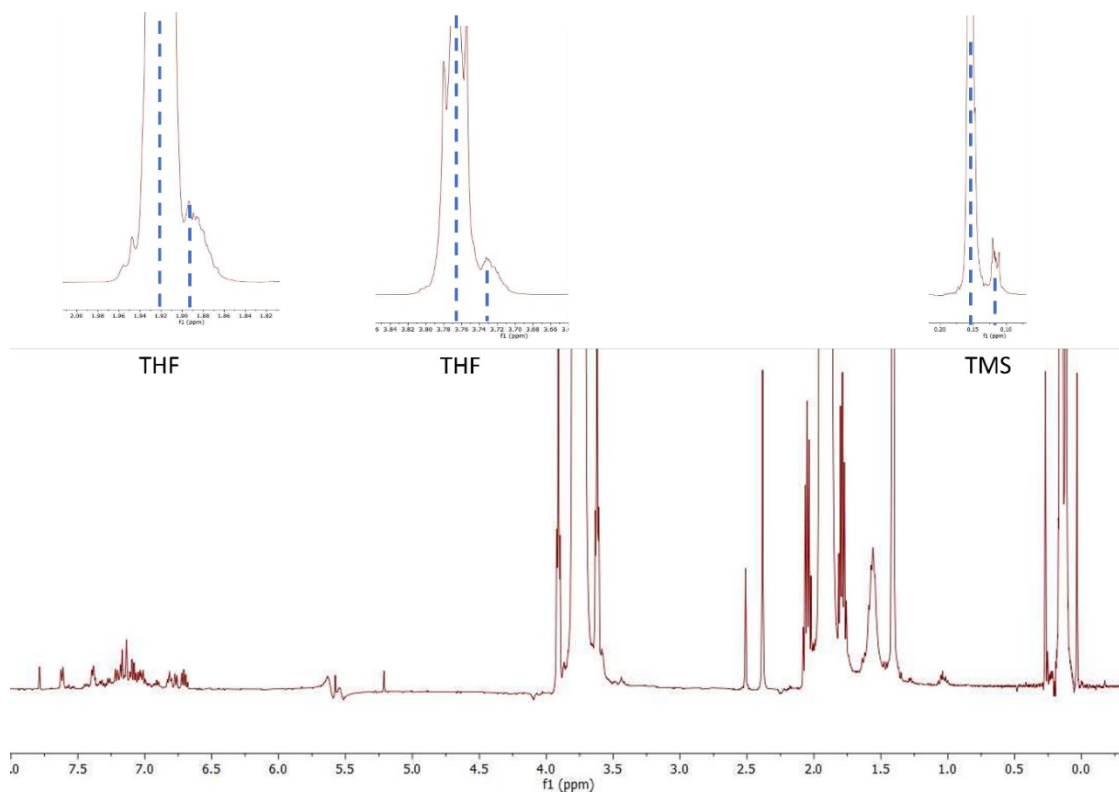

**Figure S36:** 500 MHz  $^1\text{H}$  NMR spectrum of four equivalents  $\text{PMe}_3$  added to  $[\text{Rh}^{\text{I}}(\text{CO})_2]_2[\mu\text{:}\eta^5\text{:}\eta^5\text{Ph}_4\text{Pn}]$  in  $\text{THF-H}_8$  with capillary insert of TMS in THF.

Substitution of **5** with bis(diphenylphosphino)ethane

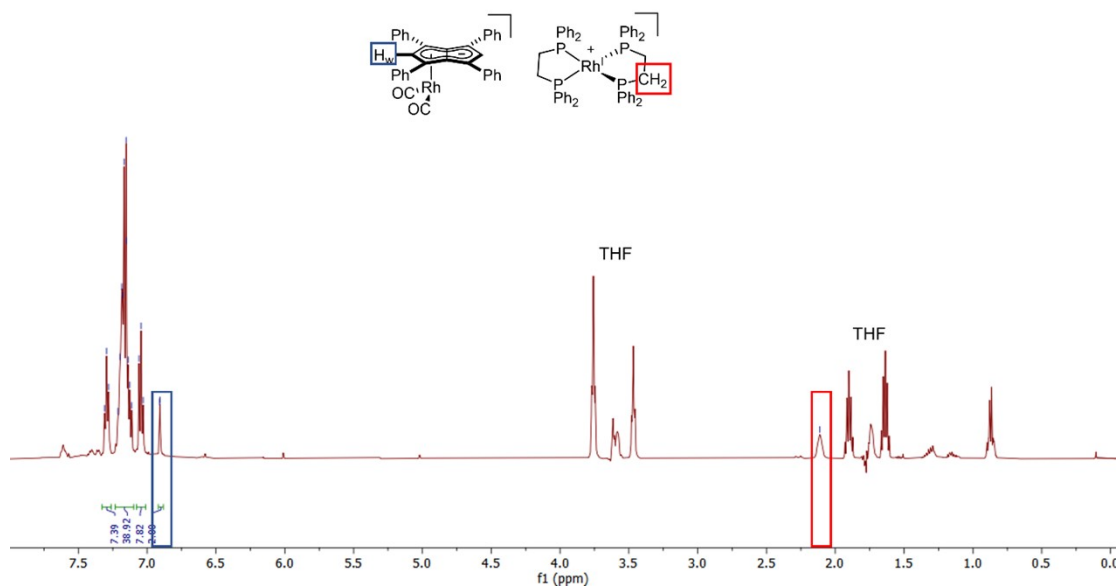

**Figure S37:** 500 MHz  $^1\text{H}$  NMR spectrum of *in-situ* formed  $[\text{Rh}'(\text{dppe})_2][\text{Rh}(\text{CO})_2(\eta^5\text{Ph}_4\text{Pn})]$  in  $\text{THF-H}_8$ . Spectrum obtained using the  $\text{lc1gppnf2}$  solvent suppression pulse sequence, a double presaturation experiment during relaxation and mixing time using two independent channels.

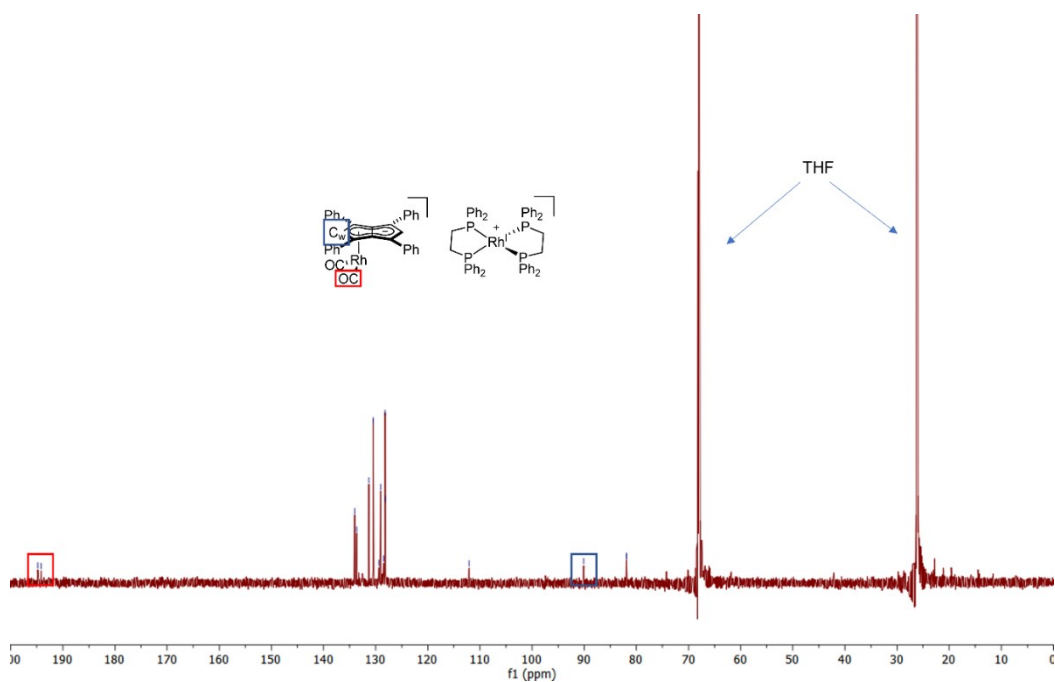

**Figure S38:** 126 MHz  $^{13}\text{C}\{^1\text{H}\}$  NMR spectrum of *in-situ* formed  $[\text{Rh}'(\text{dppe})_2][\text{Rh}'(\text{CO})_2(\eta^5\text{Ph}_4\text{Pn})]$  in  $\text{THF-H}_8$ .

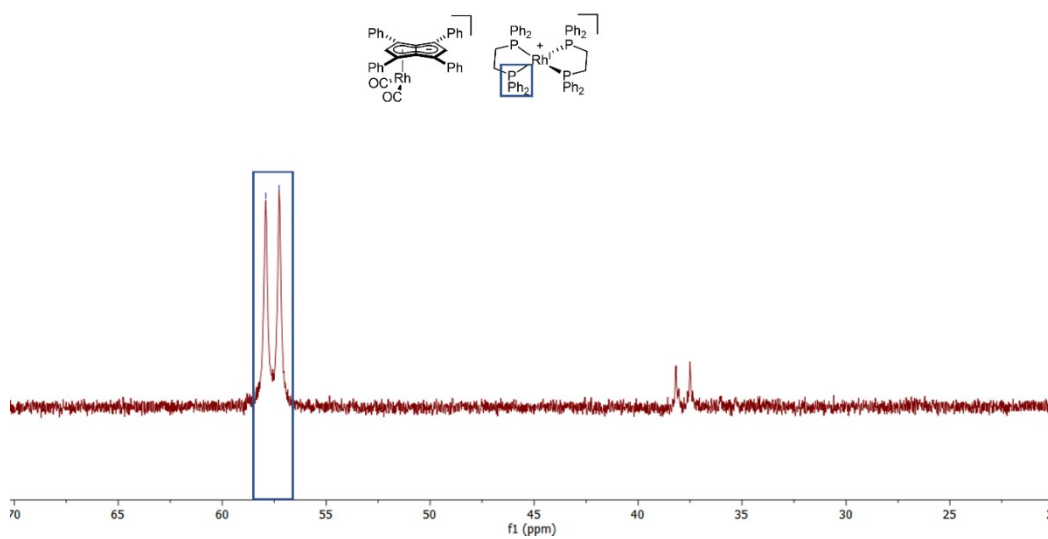

**Figure S39:** 202 MHz  $^{31}\text{P}\{^1\text{H}\}$  NMR spectrum of *in-situ* formed  $[\text{Rh}(\text{dppe})_2][\text{Rh}(\text{CO})_2(\eta^5\text{Ph}_4\text{Pn})]$  in THF- $\text{H}_8$

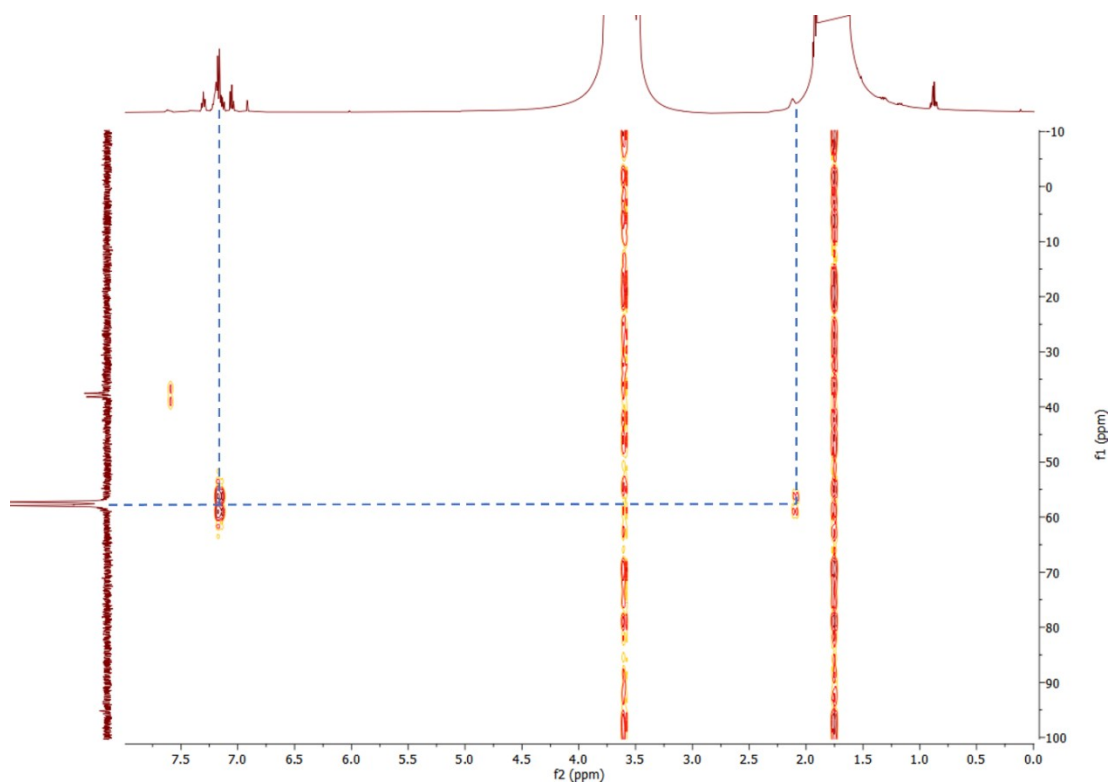

**Figure S40:** 500 MHz  $^1\text{H}$ - $^{31}\text{P}$  HMBC spectrum of *in-situ* formed  $[\text{Rh}(\text{dppe})_2][\text{Rh}(\text{CO})_2(\eta^5\text{Ph}_4\text{Pn})]$  in THF- $\text{H}_8$  (Blue =  $\text{Rh}(\text{dppe})_2^+$ )

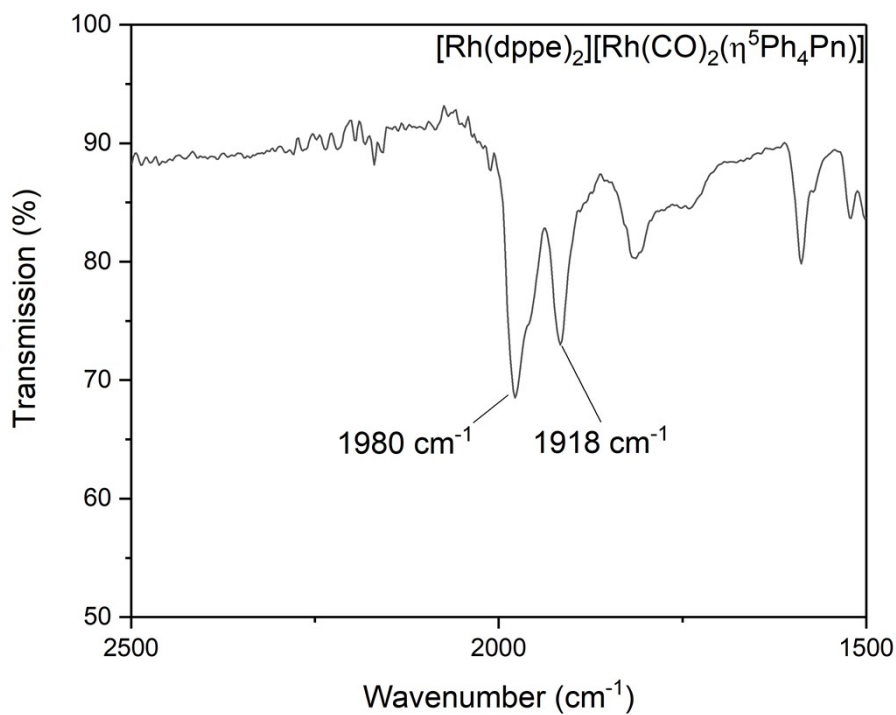

**Figure S41:** ATR-IR spectrum of solid  $[\text{Rh}^{\text{I}}(\text{dppe})_2][\text{Rh}^{\text{I}}(\text{CO})_2(\eta^5\text{Ph}_4\text{Pn})]$  (expanded CO region)

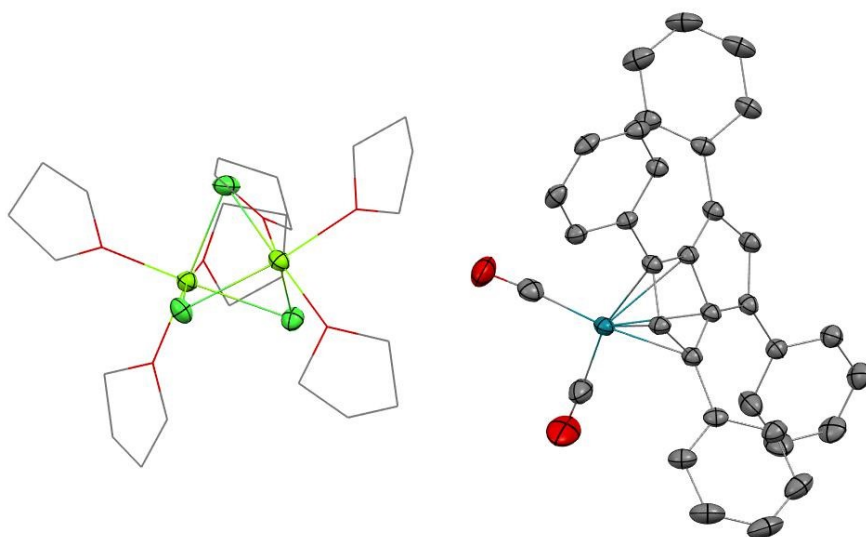

**Figure S42:** XRD structure of  $[\text{Mg}_2(\mu\text{-Cl})_3(\text{THF})_6][\text{Rh}^{\text{I}}(\text{CO})_2(\eta^5\text{-Ph}_4\text{Pn})]$  with thermal ellipsoids at the 50% probability level (hydrogens omitted for clarity)



Reaction of **5** with Triphenylphosphite

1eq  $P(O\text{Ph})_3$

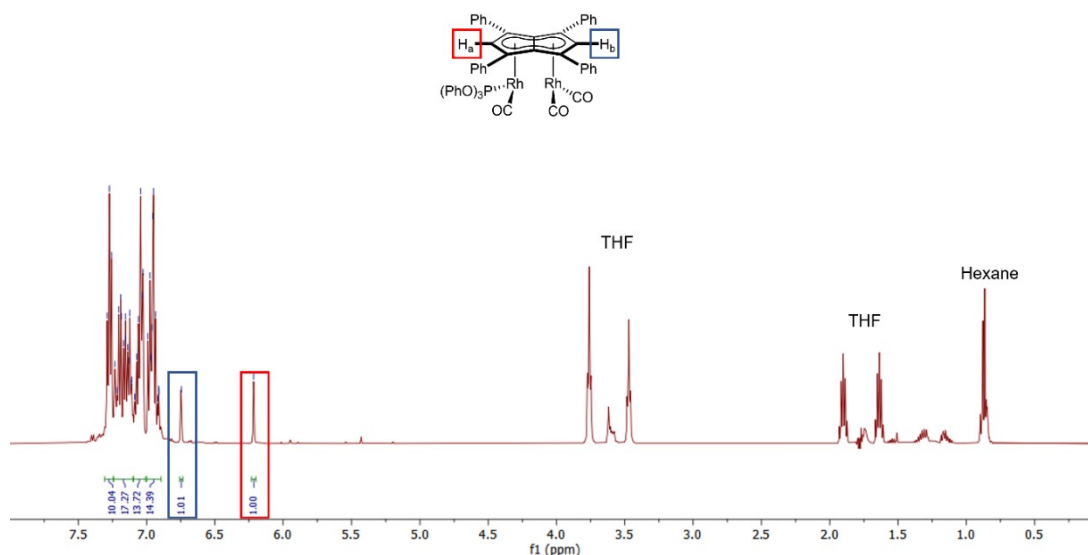

**Figure S43:** 500 MHz  $^1\text{H}$  NMR spectrum of *in-situ*  $[\text{Rh}^I(\text{CO})_2;\text{Rh}^I(\text{CO})(\text{P}(\text{O}\text{Ph})_3)][\mu:\eta^5:\eta^5\text{Ph}_4\text{Pn}]$  in THF- $\text{H}_8$ . Spectrum obtained using the lc1gppnf2 solvent suppression pulse sequence, a double presaturation experiment during relaxation and mixing time using two independent channels.

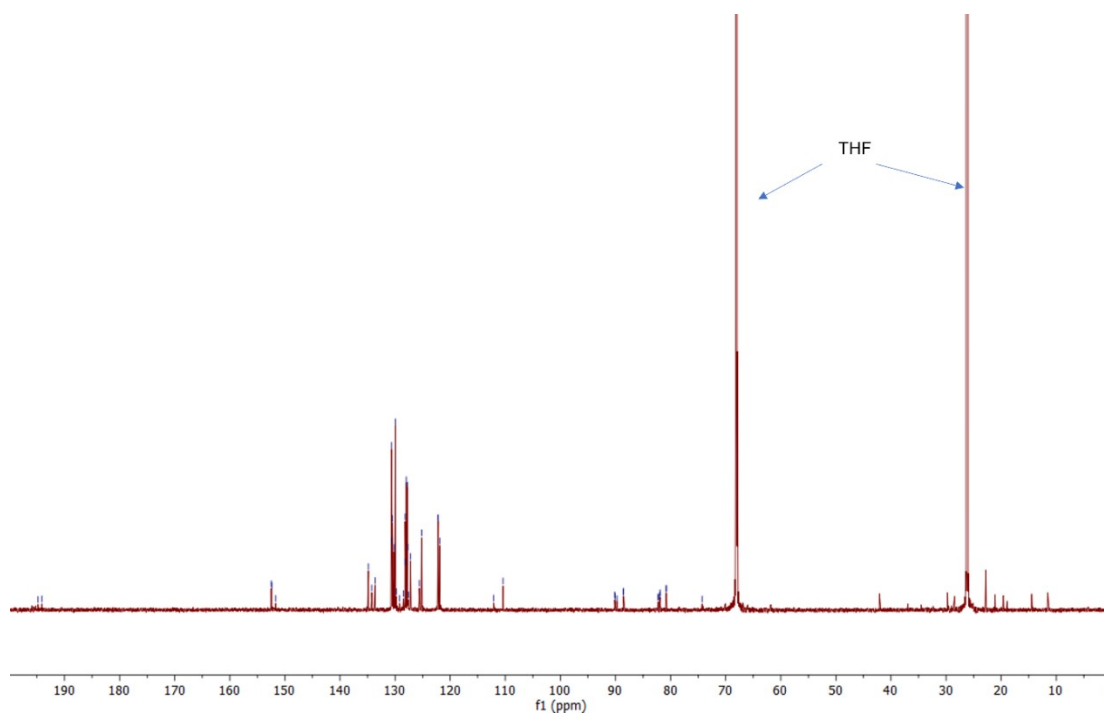

**Figure S44:** 126 MHz  $^{13}\text{C}\{^1\text{H}\}$  NMR spectrum of *in-situ*  $[\text{Rh}^I(\text{CO})_2;\text{Rh}^I(\text{CO})(\text{P}(\text{O}\text{Ph})_3)][\mu:\eta^5:\eta^5\text{Ph}_4\text{Pn}]$  in THF- $\text{H}_8$

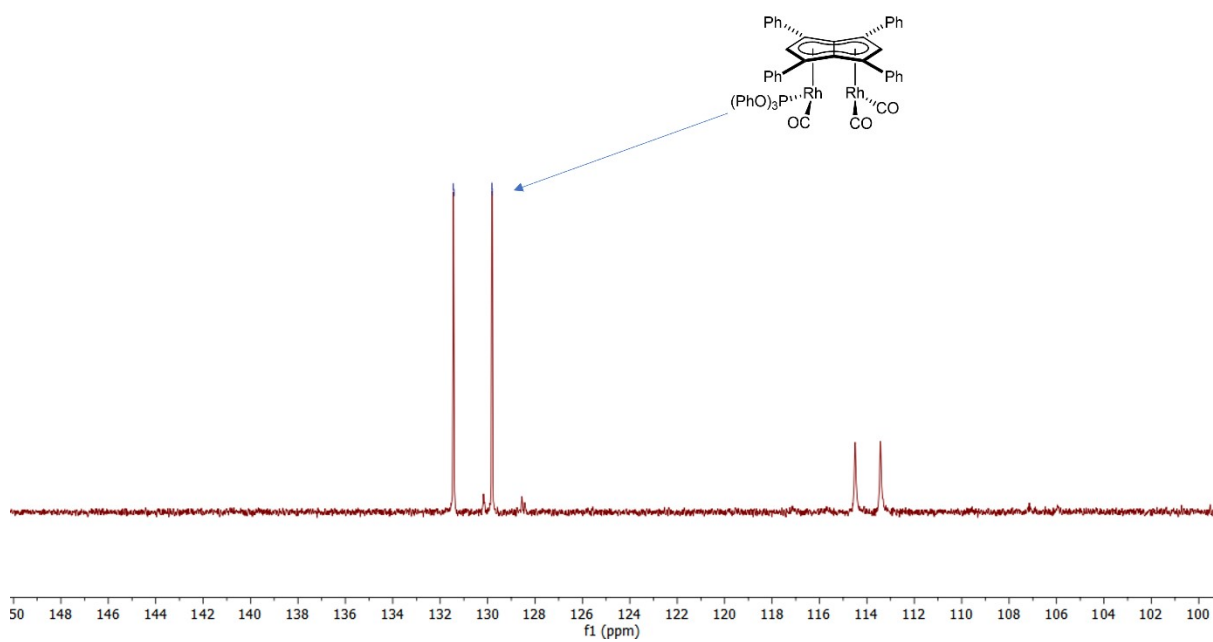

**Figure S45:** 202 MHz  $^{31}\text{P}\{^1\text{H}\}$  NMR spectrum of *in-situ*  $[\text{Rh}'(\text{CO})_2;\text{Rh}'(\text{CO})(\text{P}\{\text{OPh}\}_3)][\mu:\eta^5:\eta^5\text{Ph}_4\text{Pn}]$  in  $\text{THF-H}_8$

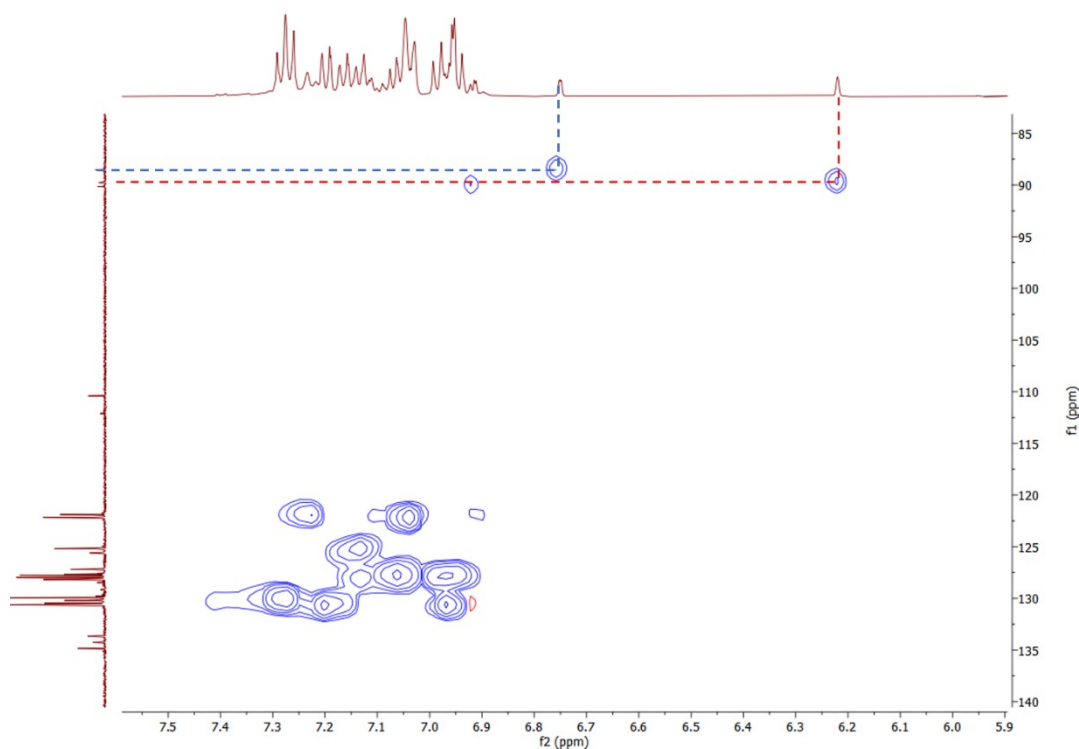

**Figure S46:** 500 MHz  $^1\text{H}-^{13}\text{C}$  HSQC spectrum of *in-situ*  $[\text{Rh}'(\text{CO})_2;\text{Rh}'(\text{CO})(\text{P}\{\text{OPh}\}_3)][\mu:\eta^5:\eta^5\text{Ph}_4\text{Pn}]$  in  $\text{THF-H}_8$  (Blue =  $\text{H}_b$ , Red =  $\text{H}_a$ )

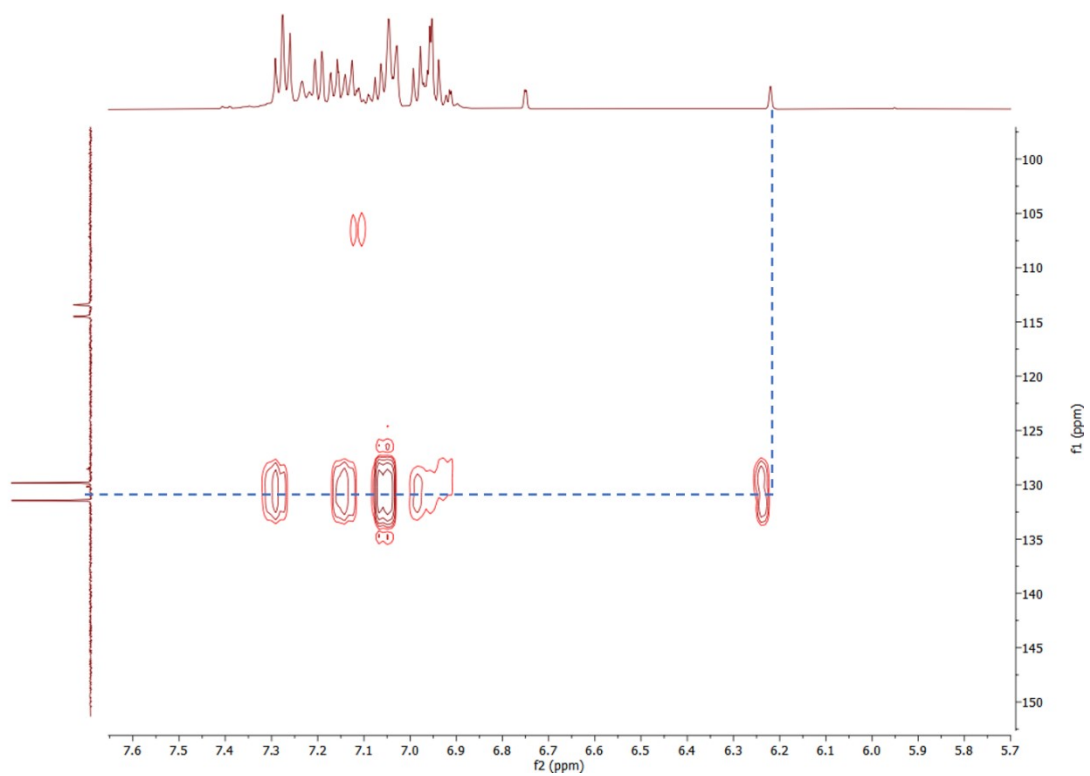

**Figure S47:** 500 MHz  $^1\text{H}$ - $^{31}\text{P}$  HMBC spectrum of *in-situ*  $[\text{Rh}^{\text{I}}(\text{CO})_2;\text{Rh}^{\text{I}}(\text{CO})(\text{P}\{\text{OPh}\}_3)][\mu\text{:}\eta^5\text{:}\eta^5\text{Ph}_4\text{Pn}]$  in THF- $\text{H}_8$  (Blue =  $\text{H}_a$ )

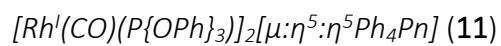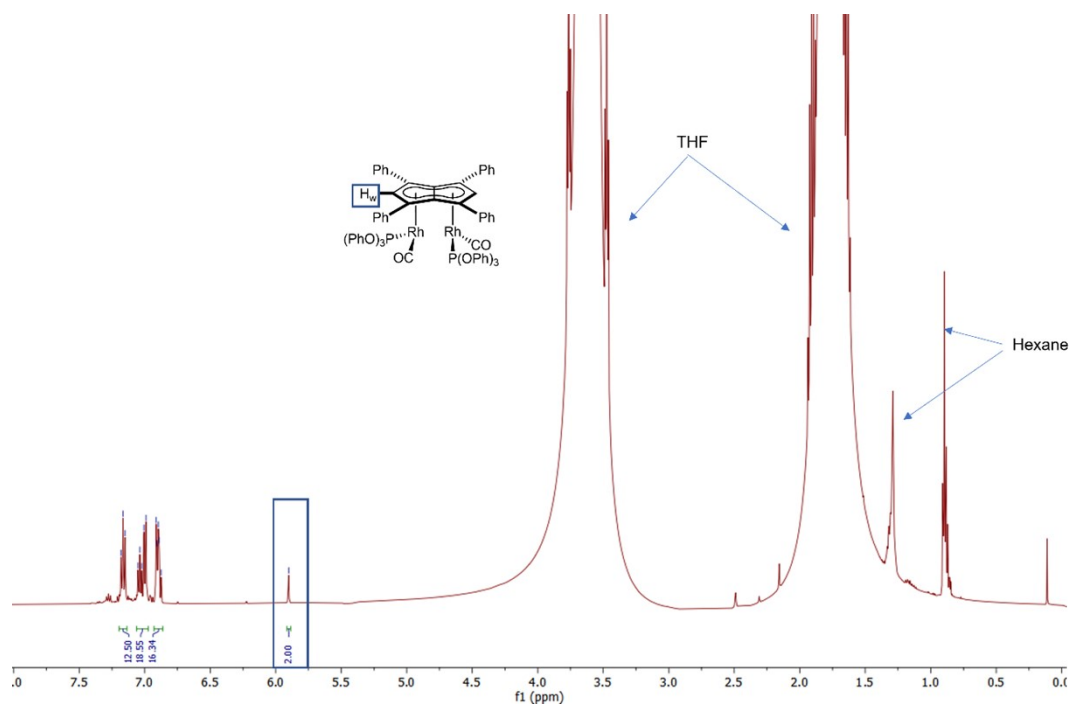

Figure S48: 500 MHz  $^1\text{H}$  NMR spectrum of  $[\text{Rh}^{\text{I}}(\text{CO})(\text{P}(\text{O}^i\text{Pr})_3)_2][\mu\text{:}\eta^5\text{:}\eta^5\text{Ph}_4\text{Pn}]$  in THF- $\text{H}_8$

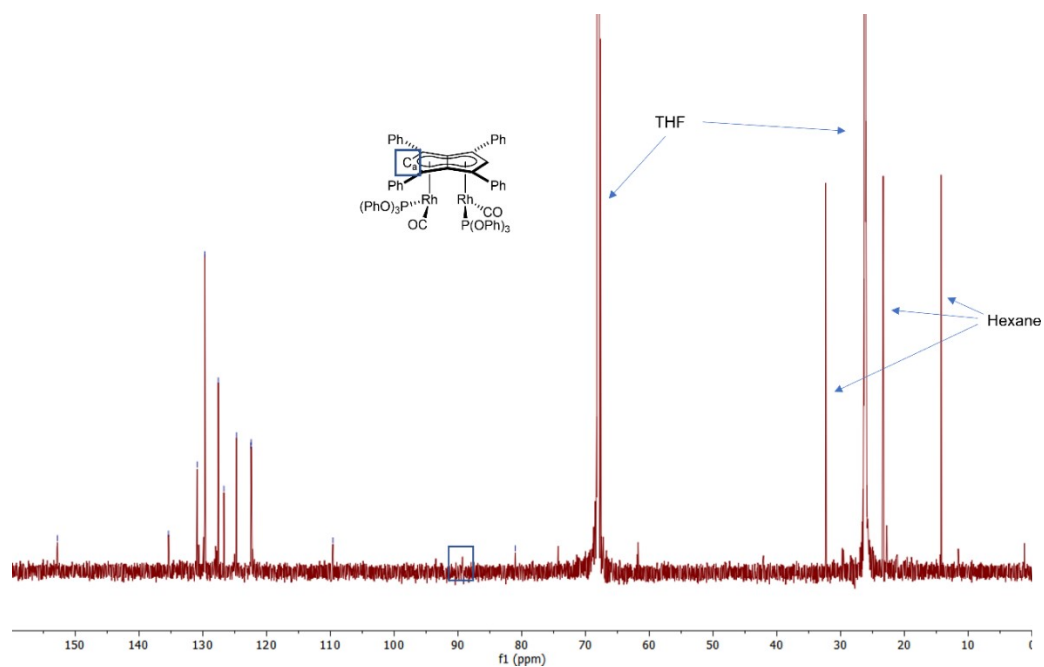

Figure S49: 126 MHz  $^{13}\text{C}\{^1\text{H}\}$  NMR spectrum of  $[\text{Rh}^{\text{I}}(\text{CO})(\text{P}(\text{O}^i\text{Pr})_3)_2][\mu\text{:}\eta^5\text{:}\eta^5\text{Ph}_4\text{Pn}]$  in THF- $\text{H}_8$

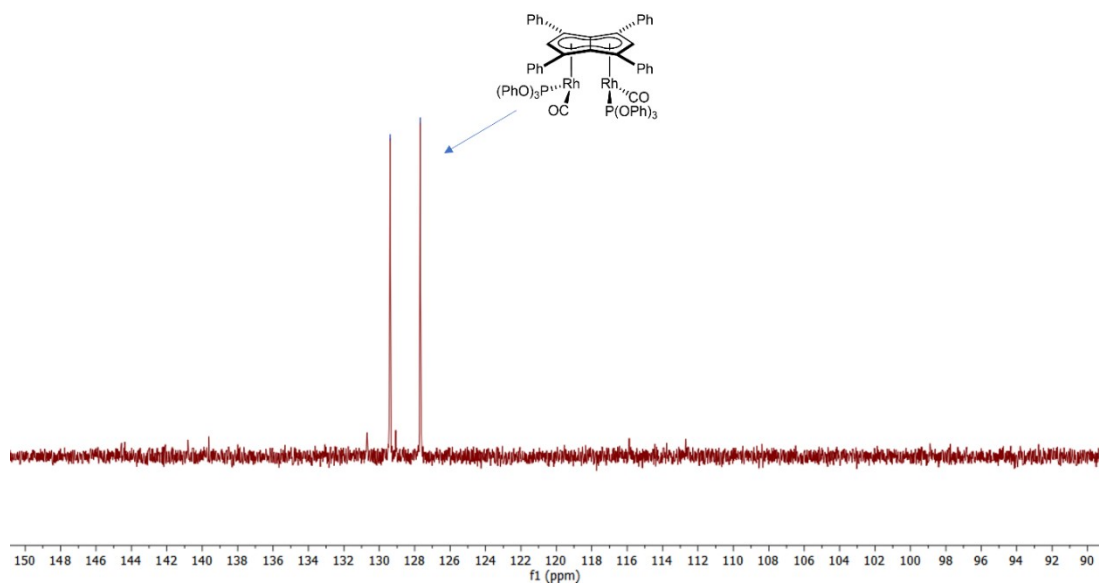

**Figure S50:** 202 MHz  $^{31}\text{P}\{^1\text{H}\}$  NMR spectrum of  $[\text{Rh}(\text{CO})(\text{P}(\text{OPh})_3)_2][\mu:\eta^5:\eta^5\text{Ph}_4\text{Pn}]$  in  $\text{THF-H}_8$

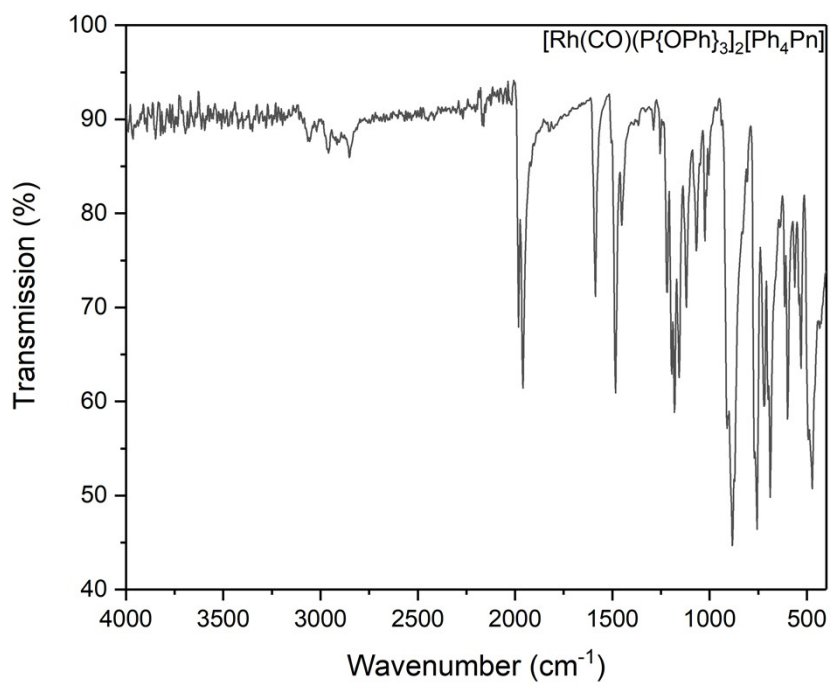

**Figure S51:** ATR-IR spectrum of solid  $[\text{Rh}(\text{CO})(\text{P}(\text{OPh})_3)_2][\mu:\eta^5:\eta^5\text{Ph}_4\text{Pn}]$

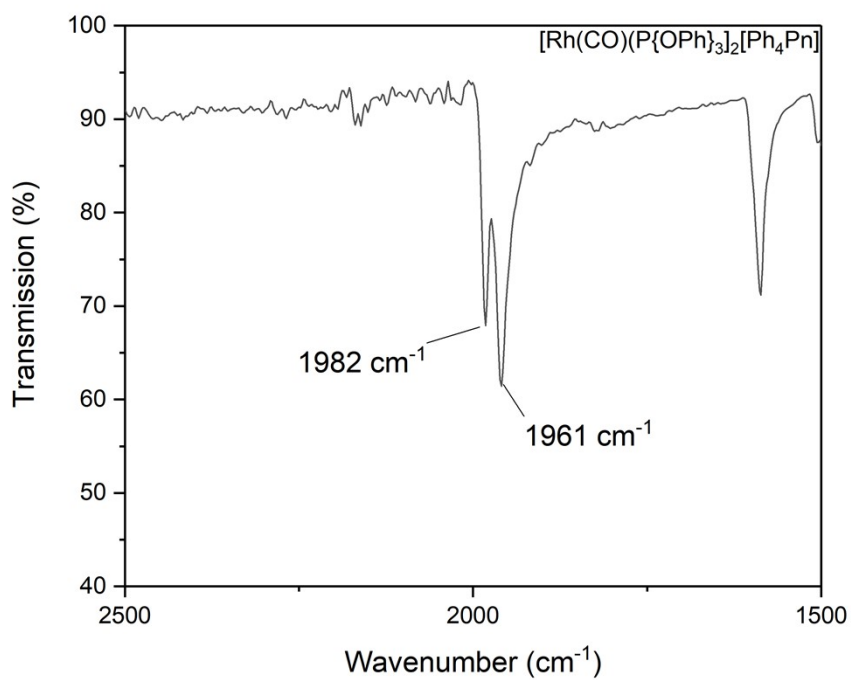

**Figure S52:** ATR-IR spectrum of solid [Rh<sup>I</sup>(CO)(P{OPh}<sub>3</sub>)<sub>2</sub>][μ-η<sup>5</sup>:η<sup>5</sup>Ph<sub>4</sub>Pn], expansion of CO region.

Reaction of **5** with Trimethylphosphite

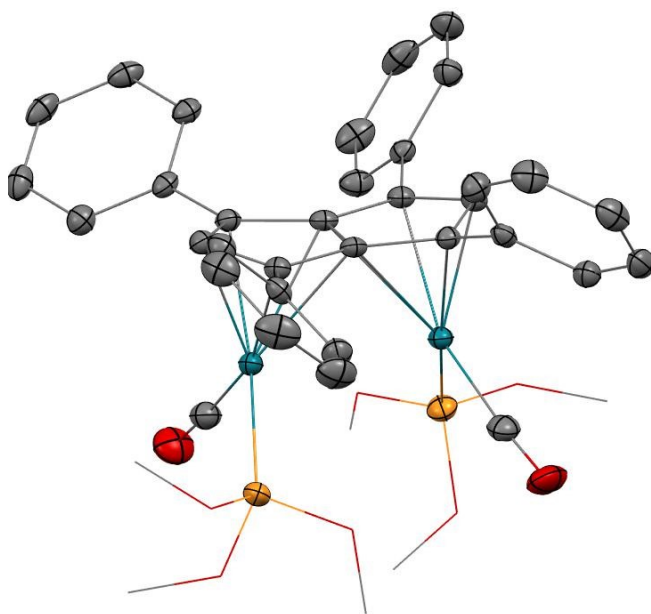

**Figure S53:** XRD structure of *E-syn*-[Rh<sup>I</sup>(CO)(P{OMe}<sub>3</sub>)<sub>2</sub>][Ph<sub>4</sub>Pn] with thermal ellipsoids at the 50% probability level (hydrogens omitted for clarity)

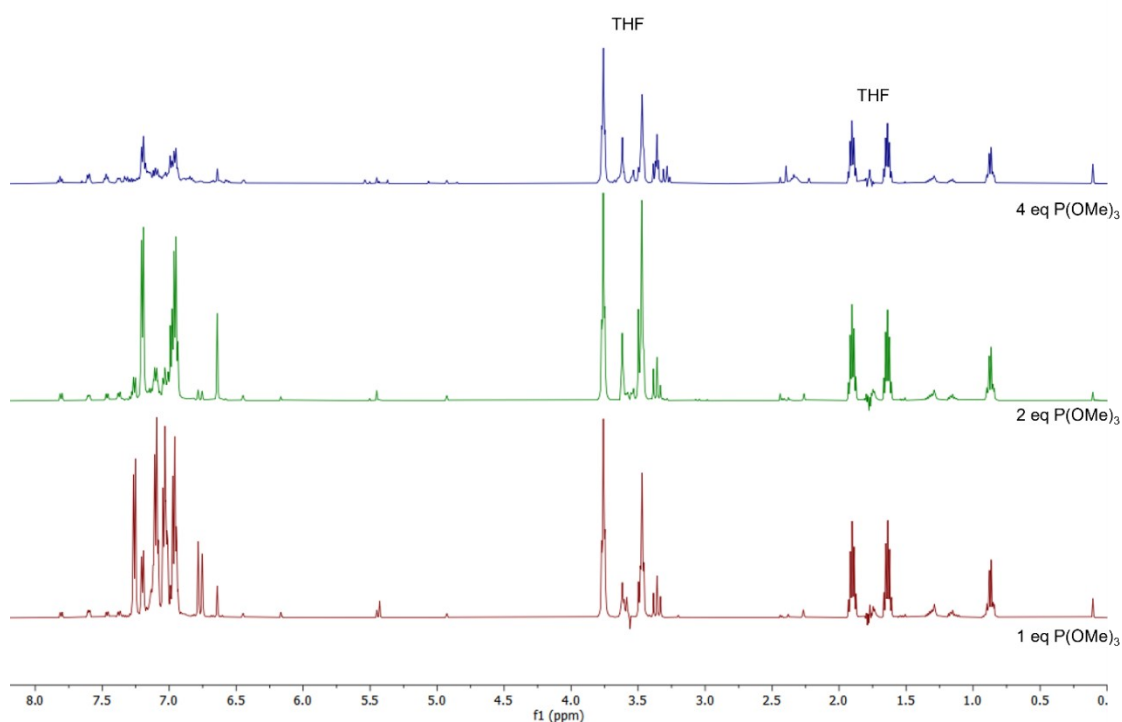

**Figure S54:** 500 MHz  $^1\text{H}$  NMR spectra of addition of  $\text{P}(\text{OMe})_3$  to  $[\text{Rh}^{\text{I}}(\text{CO})_2]_2[\mu:\eta^5:\eta^5\text{Ph}_4\text{Pn}]$  in  $\text{THF}-\text{H}_8$ . Spectra obtained using the  $\text{Ic1gppnf2}$  solvent suppression pulse sequence, a double presaturation experiment during relaxation and mixing time using two independent channels.

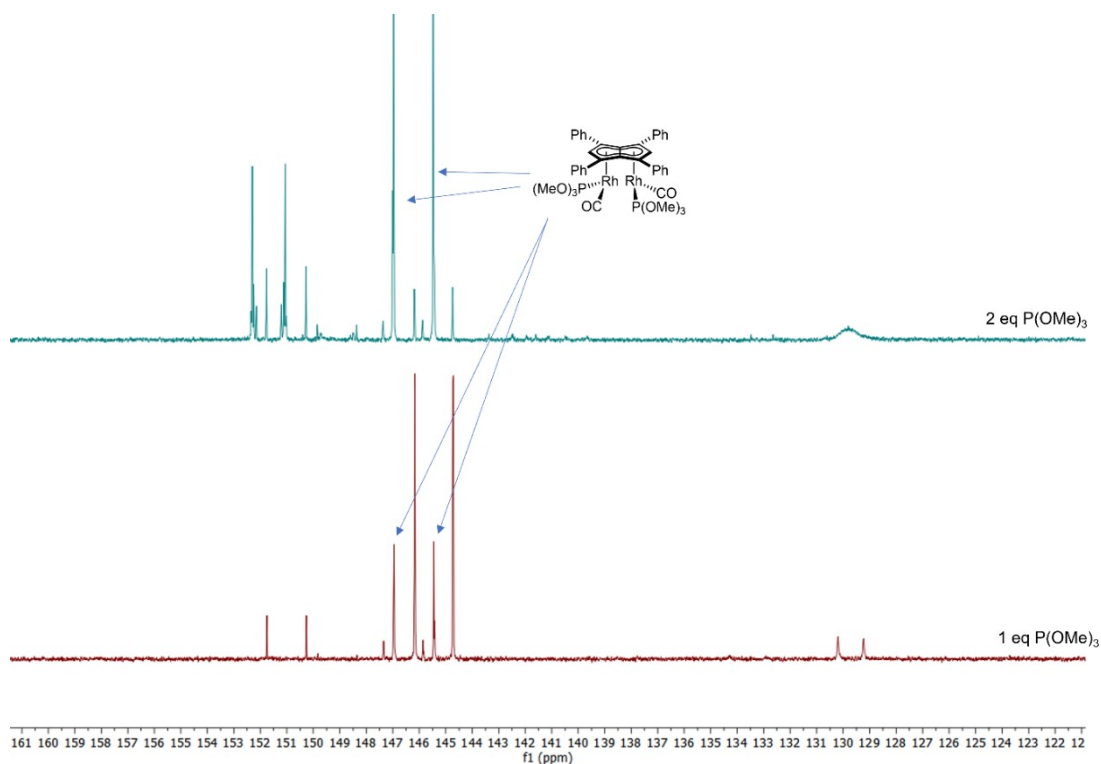

**Figure S55:** 202 MHz  $^{31}\text{P}\{^1\text{H}\}$  NMR spectra of addition of  $\text{P}(\text{OMe})_3$  to  $[\text{Rh}^{\text{I}}(\text{CO})_2]_2[\mu:\eta^5:\eta^5\text{Ph}_4\text{Pn}]$  in  $\text{THF}-\text{H}_8$

### UV-vis Spectra of 5, 6 and 11

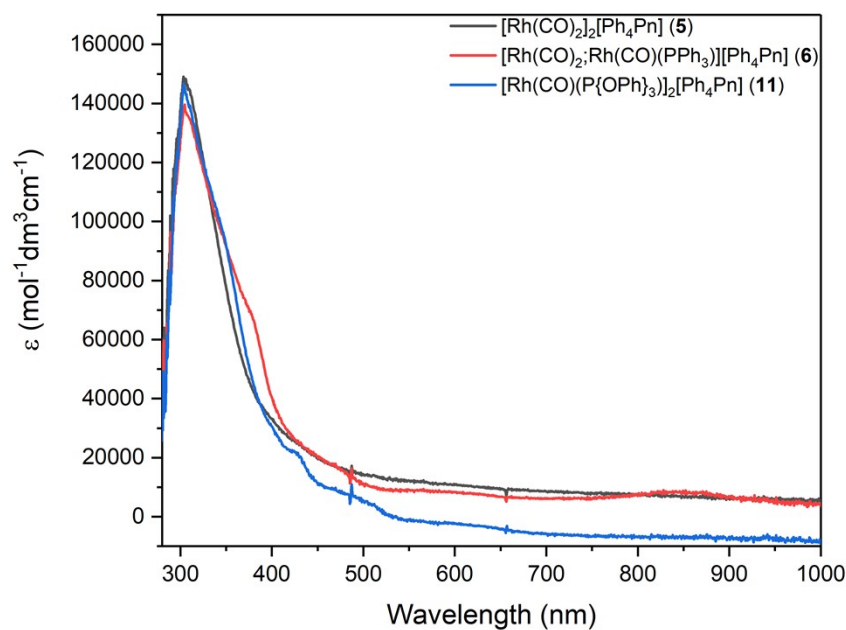

**Figure S56:** UV-vis spectra of  $[\text{Rh}^{\text{I}}(\text{CO})_2]_2[\text{Ph}_4\text{Pn}]$ ,  $[\text{Rh}^{\text{I}}(\text{CO})_2;\text{Rh}^{\text{I}}(\text{CO})(\text{PPh}_3)][\text{Ph}_4\text{Pn}]$  and  $[\text{Rh}^{\text{I}}(\text{CO})(\text{P}(\text{O}^{\text{Ph}})_3)_2][\text{Ph}_4\text{Pn}]$  recorded at  $1.5 \times 10^{-6}$  M in THF at 298K

### Near-IR Spectra of 5, 10 and 11

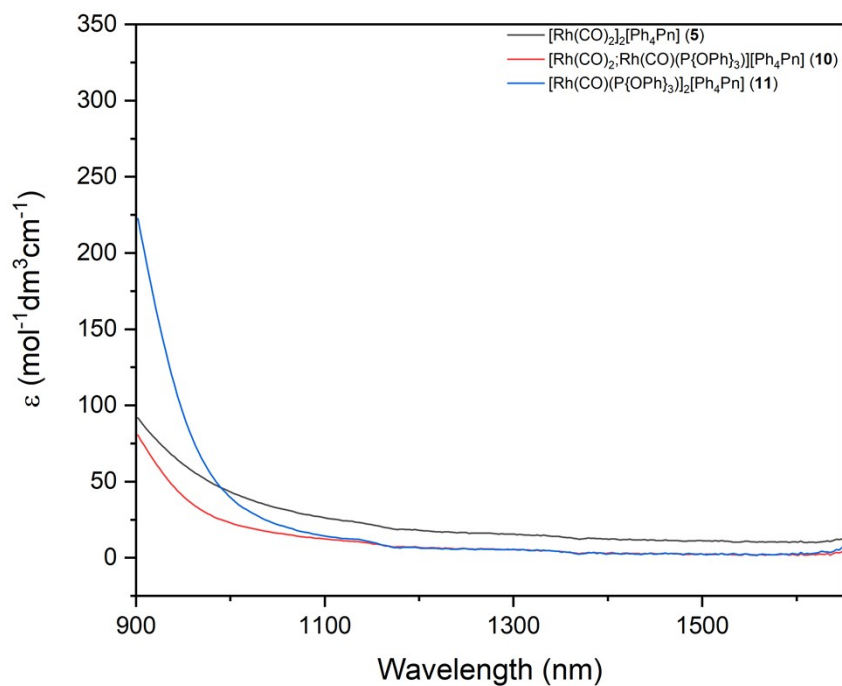

**Figure S57:** NIR spectra of  $[\text{Rh}^{\text{I}}(\text{CO})_2]_2[\text{Ph}_4\text{Pn}]$ ,  $[\text{Rh}^{\text{I}}(\text{CO})_2;\text{Rh}^{\text{I}}(\text{CO})(\text{P}(\text{O}^{\text{Ph}})_3)][\text{Ph}_4\text{Pn}]$  and  $[\text{Rh}^{\text{I}}(\text{CO})(\text{P}(\text{O}^{\text{Ph}})_3)_2][\text{Ph}_4\text{Pn}]$  recorded at  $1.5 \times 10^{-5}$  M in THF at 298K



## Computational Data

### Methodology

DFT calculations were run with Gaussian 16 (C.01).<sup>1</sup> The Rh centres were described with the Stuttgart RECPs and associated basis sets,<sup>2</sup> and the 6-31G\*\* basis sets were used for all other atoms (BS1).<sup>3,4</sup> Initial BP86<sup>5,6</sup> optimizations were performed using the 'grid = ultrafine' option, with all stationary points being fully characterized via analytical frequency calculations as minima (all positive eigenvalues). All energies were recomputed with a larger basis set featuring 6-311++G\*\* on all atoms, with the exception of Rh (aug-cc-pVTZ-PP). Natural Bonding Orbital (NBO7)<sup>7</sup> analyses were performed on the BP86/BS1-optimised geometries with a larger basis set featuring 6-311++G\*\* on all atoms, with the exception of Rh (aug-cc-pVTZ-PP) within Gaussian 16 (C.01).

### Breakdown of Energy Contributions

The following tables detail the evolution of the relative energies as the successive corrections to the initial SCF energy are included. Terms used are:

|                             |                                                                               |
|-----------------------------|-------------------------------------------------------------------------------|
| $\Delta E_{BS1}$            | SCF energy computed with the BP86 functional with BS1                         |
| $\Delta H_{BS1}$            | Enthalpy at 0 K with BS1                                                      |
| $\Delta G_{BS1}$            | Free energy at 298.15 K and 1 atm with BS1                                    |
| $\Delta G_{BS1/THF}$        | Free energy corrected for THF solvent with BS1                                |
| $\Delta G_{BS1/THF + D3BJ}$ | Free energy corrected for THF and dispersion effects with BS1                 |
| $\Delta E_{BS2}$            | SCF energy computed with the BP86 functional with BS2                         |
| $\Delta G_{THF}$            | Free energy corrected for basis set (BS2), dispersion effects and THF solvent |

In each case the final data used in the main article are highlighted in bold

**Table S1.** Relative energies for computed structures. Data in bold are those used in the main text. Free energies are quoted relative to synthesised complexes, **4** and **5**, at 0.0 kcal mol<sup>-1</sup>.

|               | $\Delta E_{BS1}$ | $\Delta H_{BS1}$ | $\Delta G_{BS1}$ | $\Delta G_{BS1/THF}$ | $\Delta G_{BS1/THF + D3BJ}$ | $\Delta E_{BS2}$ | $\Delta G_{THF}$ |
|---------------|------------------|------------------|------------------|----------------------|-----------------------------|------------------|------------------|
| <b>4</b>      | 0.0              | 0.0              | 0.0              | 0.0                  | 0.0                         | 0.0              | <b>0.0</b>       |
| <b>4-syn</b>  | 1.9              | 2.6              | 3.6              | 3.8                  | 0.6                         | 2.4              | <b>1.2</b>       |
| <b>5</b>      | 0.0              | 0.0              | 0.0              | 0.0                  | 0.0                         | 0.0              | <b>0.0</b>       |
| <b>5-anti</b> | 1.6              | 1.5              | 1.4              | 2.3                  | 5.0                         | 1.2              | <b>4.6</b>       |

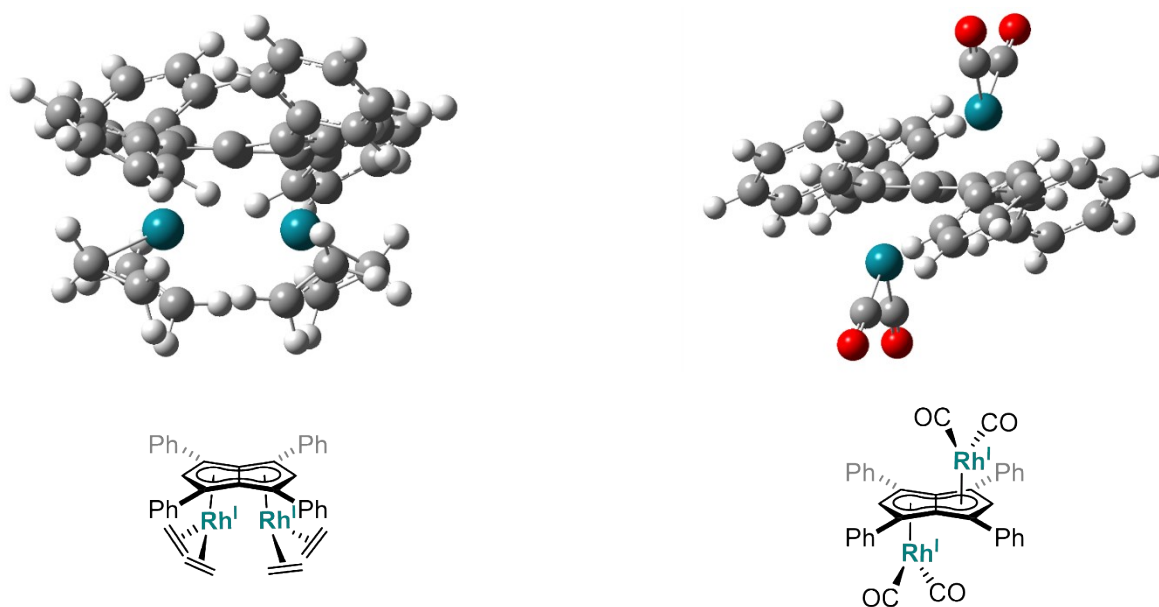

**Figure S58** – DFT optimised geometries of theoretical species, *syn*-[Rh(C<sub>2</sub>H<sub>4</sub>)<sub>2</sub>]<sub>2</sub>[Ph<sub>4</sub>Pn] (*syn*-4, left) and *anti*-[Rh(CO)<sub>2</sub>]<sub>2</sub>[Ph<sub>4</sub>Pn] (*anti*-5, right) using BP86-D3BJ(THF)/BS2//BP86/BS1

NBO Data

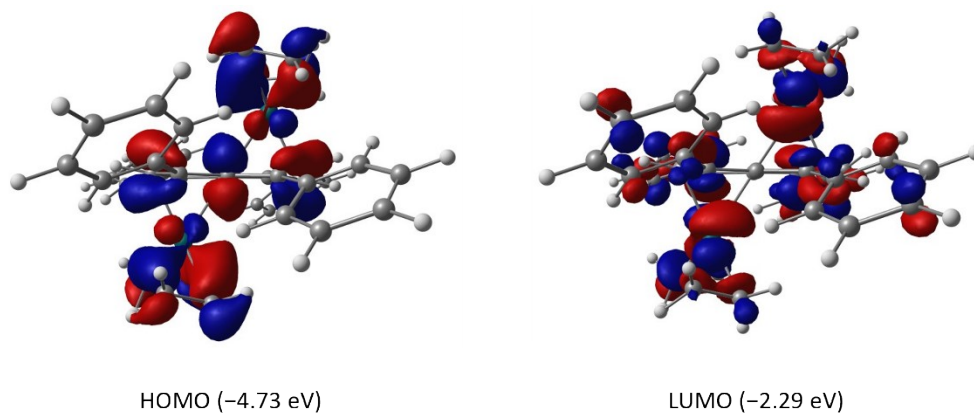

**Figure S59** - HOMO (left) and LUMO (right) of *anti*-[Rh(C<sub>2</sub>H<sub>4</sub>)<sub>2</sub>]<sub>2</sub>[Ph<sub>4</sub>Pn] (4)

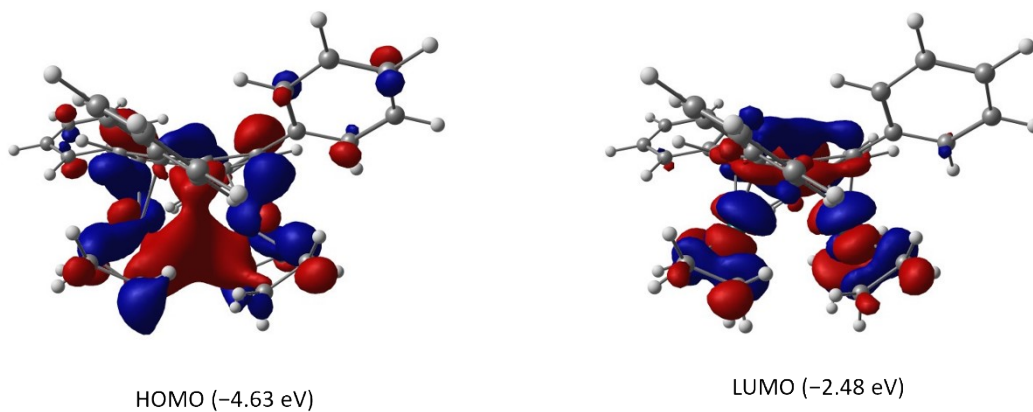

**Figure S60** - HOMO (left) and LUMO (right) of *syn*-[Rh(C<sub>2</sub>H<sub>4</sub>)<sub>2</sub>][Ph<sub>4</sub>Pn] (*syn*-4)

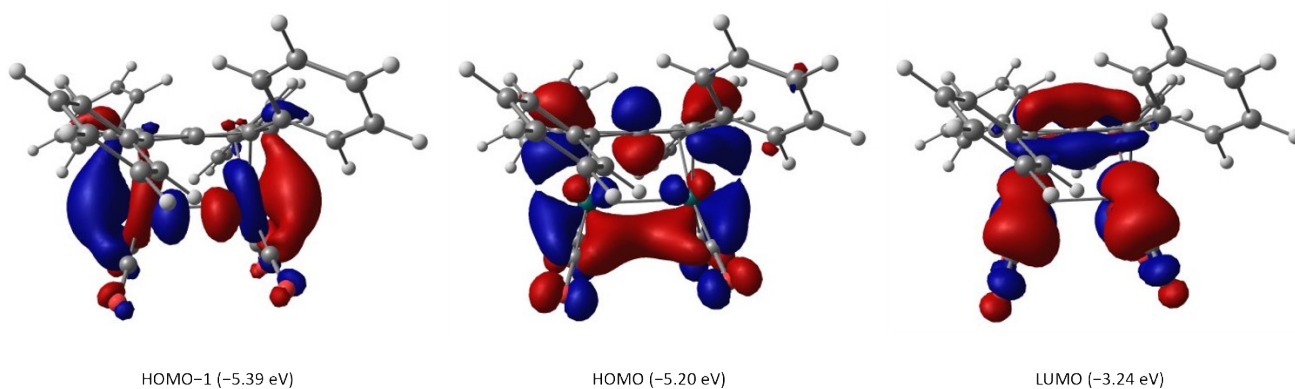

**Figure S61** - HOMO-1, HOMO and LUMO of *syn*-[Rh(CO)<sub>2</sub>][Ph<sub>4</sub>Pn] (**5**)

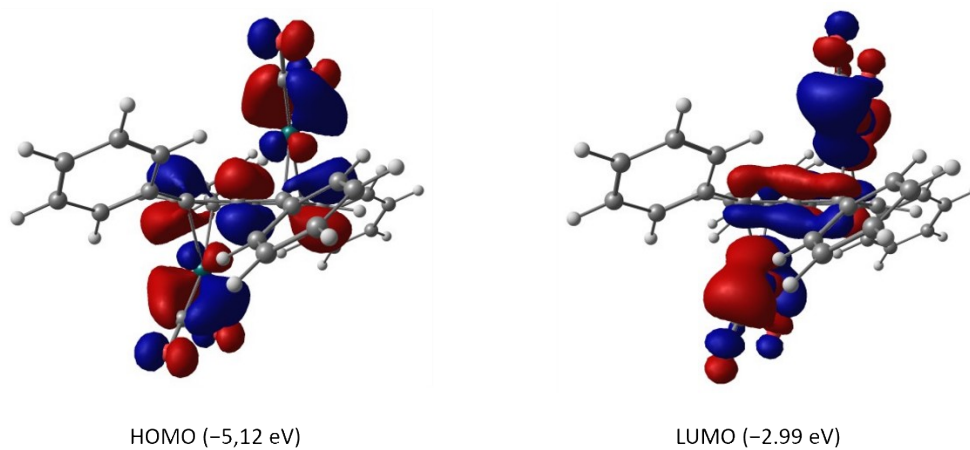

**Figure S62** - HOMO (left) and LUMO (right) of *anti*-[Rh(CO)<sub>2</sub>][Ph<sub>4</sub>Pn] (*anti*-5)

**Table S2.** Wiberg Bond Indices (WBI) data for the DFT-optimised structures **4-syn** and **5**

|         | <i>syn</i> -[Rh(C <sub>2</sub> H <sub>4</sub> ) <sub>2</sub> ][Ph <sub>4</sub> Pn] | <i>syn</i> -[Rh(CO) <sub>2</sub> ][Ph <sub>4</sub> Pn] |
|---------|------------------------------------------------------------------------------------|--------------------------------------------------------|
| Rh – Rh | 0.0587                                                                             | 0.0448                                                 |

## Cartesian Coordinates and Computed Energies (in Hartrees) for Calculated Structures

### ***anti*-[Rh(C<sub>2</sub>H<sub>4</sub>)<sub>2</sub>]<sub>2</sub>[Ph<sub>4</sub>Pn] (4)**

SCF (BP86) Energy = -1768.49137296  
 Enthalpy 0K = -1767.856404  
 Enthalpy 298K = -1767.814975  
 Free Energy 298K = -1767.929667  
 Lowest Frequency = 16.0002 cm<sup>-1</sup>  
 Second Frequency = 19.9555 cm<sup>-1</sup>  
 SCF (BP86-D3BJ) Energy =  
 -1768.72819232  
 SCF (THF) Energy = -1768.49977223  
 SCF (BS2) Energy = -1768.19693388

```
Rh -0.02738  2.02782  1.17761
C   0.72103  0.00006 -0.00001
C   1.19217  1.23215 -0.64452
C   2.55211  1.60245 -1.09854
C   3.49593  0.62132 -1.47940
H   3.24207 -0.43731 -1.38046
C   4.74715  0.99031 -1.99652
H   5.45992  0.21158 -2.28739
C   5.08290  2.34489 -2.14442
H   6.06035  2.63100 -2.54628
C   4.15522  3.33149 -1.76792
H   4.40844  4.39208 -1.87116
C   2.90667  2.96541 -1.24894
H   2.19289  3.73616 -0.93843
C   0.01744  1.94321 -1.06640
H   0.02909  2.81155 -1.72557
C  -1.18490  1.26770 -0.62260
C  -2.52620  1.70315 -1.08240
C  -2.78243  3.07686 -1.31929
H  -2.00078  3.81154 -1.10148
C  -4.01483  3.50807 -1.82589
H  -4.18551  4.57679 -1.99404
C  -5.02788  2.57756 -2.11313
H  -5.99244  2.91394 -2.50700
C  -4.78781  1.21295 -1.89295
H  -5.56256  0.47339 -2.12111
C  -3.55224  0.78079 -1.38729
H  -3.37483 -0.28566 -1.23659
C  -1.20134  3.66218  1.86058
H  -0.61989  4.35403  2.48368
H  -1.72986  4.14548  1.03098
C  -1.71286  2.45661  2.42684
H  -2.61769  2.01223  1.99727
H  -1.54755  2.21356  3.48202
C   1.68764  2.97305  2.06856
H   2.57123  2.74308  1.46055
H   1.53277  4.04394  2.24509
C   1.15412  2.00879  2.96727
H   0.59012  2.34023  3.84763
H   1.62676  1.02491  3.07761
C  -0.74289  0.00003  0.00000
C  -1.18486 -1.26768  0.62257
C  -2.52613 -1.70319  1.08238
C  -3.55217 -0.78087  1.38740
H  -3.37478  0.28560  1.23681
C  -4.78771 -1.21310  1.89308
H  -5.56247 -0.47358  2.12134
C  -5.02774 -2.57774  2.11315
H  -5.99227 -2.91418  2.50704
C  -4.01468 -3.50820  1.82579
H  -4.18533 -4.57694  1.99385
```

```
C  -2.78232 -3.07692  1.31917
H  -2.00066 -3.81157  1.10126
C   0.01751 -1.94314  1.06636
H   0.02919 -2.81145  1.72557
C   1.19222 -1.23205  0.64446
C   2.55215 -1.60230  1.09853
C   2.90675 -2.96524  1.24897
H   2.19300 -3.73602  0.93845
C   4.15529 -3.33129  1.76800
H   4.40853 -4.39186  1.87126
C   5.08294 -2.34465  2.14450
H   6.06038 -2.63073  2.54640
C   4.74715 -0.99008  1.99657
H   5.45989 -0.21133  2.28744
C   3.49593 -0.62114  1.47941
H   3.24205  0.43748  1.38045
Rh -0.02723 -2.02789 -1.17762
C   1.68779 -2.97331 -2.06837
H   1.53280 -4.04418 -2.24485
H   2.57136 -2.74340 -1.46031
C   1.15444 -2.00904 -2.96718
H   1.62717 -1.02521 -3.07751
H   0.59047 -2.34048 -3.84756
C  -1.20130 -3.66212 -1.86074
H  -1.72999 -4.14537 -1.03122
H  -0.61983 -4.35402 -2.48376
C  -1.71261 -2.45650 -2.42706
H  -1.54715 -2.21346 -3.48222
H  -2.61742 -2.01199 -1.99759
```

### ***syn*-[Rh(C<sub>2</sub>H<sub>4</sub>)<sub>2</sub>]<sub>2</sub>[Ph<sub>4</sub>Pn] (*syn*-4)**

SCF (BP86) Energy = -1768.48842457  
 Enthalpy 0K = -1767.852336  
 Enthalpy 298K = -1767.811293  
 Free Energy 298K = -1767.923952  
 Lowest Frequency = 22.5270 cm<sup>-1</sup>  
 Second Frequency = 36.2811 cm<sup>-1</sup>  
 SCF (BP86-D3BJ) Energy =  
 -1768.73032093  
 SCF (THF) Energy = -1768.49648406  
 SCF (BS2) Energy = -1768.19309736

```
C  -1.18573  1.38197 -0.90876
C   0.00272  2.20103 -0.94563
H   0.00579  3.25829 -1.21172
C   1.18478  1.38977 -0.69057
C   0.72900 -0.00708 -0.70860
C   1.18580 -1.38138 -0.90894
C  -0.00256 -2.20047 -0.94620
H  -0.00551 -3.25766 -1.21256
C  -1.18472 -1.38937 -0.69099
C  -0.72903  0.00758 -0.70872
C  -2.50190  1.88850 -1.36794
C  -3.33575  1.10691 -2.20099
H  -3.03656  0.08835 -2.46005
C  -4.52753  1.63203 -2.72250
H  -5.15415  1.00552 -3.36598
C  -4.91091  2.95059 -2.43282
H  -5.84246  3.35779 -2.83946
C  -4.08440  3.74569 -1.62106
H  -4.36828  4.77832 -1.39117
C  -2.89625  3.22159 -1.09490
H  -2.25876  3.84486 -0.45914
```

|    |          |          |          |
|----|----------|----------|----------|
| C  | 2.57425  | 1.89928  | -0.71073 |
| C  | 2.89619  | 3.10896  | -1.37276 |
| H  | 2.11491  | 3.65395  | -1.91212 |
| C  | 4.20683  | 3.60783  | -1.36885 |
| H  | 4.42958  | 4.54328  | -1.89312 |
| C  | 5.22989  | 2.90997  | -0.70624 |
| H  | 6.25307  | 3.29943  | -0.70457 |
| C  | 4.92879  | 1.70522  | -0.05018 |
| H  | 5.71734  | 1.14778  | 0.46603  |
| C  | 3.61870  | 1.20630  | -0.05109 |
| H  | 3.39488  | 0.26387  | 0.45824  |
| C  | 2.50204  | -1.88763 | -1.36824 |
| C  | 3.33562  | -1.10588 | -2.20140 |
| H  | 3.03620  | -0.08736 | -2.46039 |
| C  | 4.52741  | -1.63079 | -2.72309 |
| H  | 5.15383  | -1.00419 | -3.36667 |
| C  | 4.91109  | -2.94927 | -2.43342 |
| H  | 5.84265  | -3.35629 | -2.84019 |
| C  | 4.08488  | -3.74451 | -1.62148 |
| H  | 4.36904  | -4.77705 | -1.39156 |
| C  | 2.89671  | -3.22062 | -1.09516 |
| H  | 2.25946  | -3.84393 | -0.45919 |
| C  | -2.57406 | -1.89921 | -0.71136 |
| C  | -2.89559 | -3.10909 | -1.37324 |
| H  | -2.11412 | -3.65399 | -1.91240 |
| C  | -4.20609 | -3.60831 | -1.36946 |
| H  | -4.42848 | -4.54391 | -1.89362 |
| C  | -5.22947 | -2.91062 | -0.70718 |
| H  | -6.25255 | -3.30035 | -0.70561 |
| C  | -4.92880 | -1.70568 | -0.05128 |
| H  | -5.71759 | -1.14833 | 0.46469  |
| C  | -3.61883 | -1.20641 | -0.05203 |
| H  | -3.39540 | -0.26383 | 0.45717  |
| Rh | -0.11851 | 1.63127  | 1.15747  |
| Rh | 0.11825  | -1.63148 | 1.15716  |
| C  | 1.00900  | 3.21111  | 2.01399  |
| C  | 1.45335  | 1.97417  | 2.57220  |
| H  | 0.39553  | 3.89507  | 2.61401  |
| H  | 1.60851  | 3.70639  | 1.24020  |
| H  | 1.20118  | 1.70488  | 3.60356  |
| H  | 2.38711  | 1.53572  | 2.19901  |
| C  | -1.44619 | 1.42406  | 2.86096  |
| C  | -1.87448 | 2.50685  | 2.05064  |
| H  | -0.92659 | 1.61719  | 3.80643  |
| H  | -1.96669 | 0.46521  | 2.81776  |
| H  | -1.69564 | 3.54412  | 2.35736  |
| H  | -2.72246 | 2.37922  | 1.36800  |
| C  | 1.44417  | -1.42660 | 2.86237  |
| C  | 1.87528  | -2.50610 | 2.04919  |
| H  | 0.92400  | -1.62374 | 3.80671  |
| H  | 1.96291  | -0.46666 | 2.82269  |
| H  | 1.69826  | -3.54468 | 2.35253  |
| H  | 2.72351  | -2.37466 | 1.36760  |
| C  | -1.00778 | -3.21227 | 2.01361  |
| C  | -1.45453 | -1.97565 | 2.57063  |
| H  | -0.39383 | -3.89494 | 2.61463  |
| H  | -1.60588 | -3.70897 | 1.23964  |
| H  | -1.20389 | -1.70526 | 3.60208  |
| H  | -2.38847 | -1.53874 | 2.19607  |

**syn-[Rh(CO)<sub>2</sub>]<sub>2</sub>[Ph<sub>4</sub>Pn] (5)**

SCF (BP86) Energy = -1907.48671547

Enthalpy 0K = -1907.031402

Enthalpy 298K = -1906.991886

Free Energy 298K = -1907.106987

Lowest Frequency = 19.7728 cm<sup>-1</sup>

Second Frequency = 30.1757 cm<sup>-1</sup>

SCF (BP86-D3BJ) Energy =

-1907.68722449

SCF (THF) Energy = -1907.49678106

SCF (BS2) Energy = -1907.26206118

|   |          |          |          |
|---|----------|----------|----------|
| C | 1.21833  | -1.36836 | -0.91296 |
| C | 0.04646  | -2.21756 | -0.99351 |
| H | 0.07125  | -3.28875 | -1.19118 |
| C | -1.15200 | -1.41976 | -0.80739 |
| C | -0.72339 | -0.01214 | -0.86008 |
| C | -1.21833 | 1.36858  | -0.91299 |
| C | -0.04651 | 2.21779  | -0.99331 |
| H | -0.07126 | 3.28901  | -1.19083 |
| C | 1.15197  | 1.41995  | -0.80722 |
| C | 0.72342  | 0.01238  | -0.86012 |
| C | 2.59068  | -1.85390 | -1.21535 |
| C | 3.39847  | -1.17510 | -2.15411 |
| H | 3.03432  | -0.25138 | -2.61325 |
| C | 4.65670  | -1.68294 | -2.51173 |
| H | 5.26908  | -1.14149 | -3.24015 |
| C | 5.12685  | -2.87652 | -1.94278 |
| H | 6.11043  | -3.26940 | -2.22028 |
| C | 4.32810  | -3.56339 | -1.01267 |
| H | 4.68748  | -4.49306 | -0.55916 |
| C | 3.07217  | -3.05735 | -0.65205 |
| H | 2.45598  | -3.58258 | 0.08585  |
| C | -2.53660 | -1.95313 | -0.87796 |
| C | -2.82927 | -3.05334 | -1.71510 |
| H | -2.03477 | -3.49131 | -2.32835 |
| C | -4.12935 | -3.57673 | -1.78194 |
| H | -4.33614 | -4.42934 | -2.43720 |
| C | -5.15958 | -3.00802 | -1.01685 |
| H | -6.17366 | -3.41757 | -1.06699 |
| C | -4.88143 | -1.90912 | -0.18615 |
| H | -5.67705 | -1.45934 | 0.41640  |
| C | -3.58400 | -1.38505 | -0.11795 |
| H | -3.37207 | -0.53861 | 0.54235  |
| C | -2.59071 | 1.85414  | -1.21521 |
| C | -3.39827 | 1.17580  | -2.15451 |
| H | -3.03392 | 0.25240  | -2.61415 |
| C | -4.65653 | 1.68368  | -2.51198 |
| H | -5.26874 | 1.14260  | -3.24082 |
| C | -5.12693 | 2.87684  | -1.94234 |
| H | -6.11054 | 3.26975  | -2.21973 |
| C | -4.32841 | 3.56324  | -1.01168 |
| H | -4.68800 | 4.49257  | -0.55764 |
| C | -3.07246 | 3.05715  | -0.65121 |
| H | -2.45642 | 3.58201  | 0.08710  |
| C | 2.53656  | 1.95341  | -0.87766 |
| C | 2.82926  | 3.05353  | -1.71489 |
| H | 2.03481  | 3.49140  | -2.32827 |
| C | 4.12934  | 3.57698  | -1.78164 |
| H | 4.33616  | 4.42952  | -2.43697 |
| C | 5.15950  | 3.00840  | -1.01638 |
| H | 6.17357  | 3.41799  | -1.06643 |
| C | 4.88131  | 1.90957  | -0.18558 |

|    |          |          |          |
|----|----------|----------|----------|
| H  | 5.67689  | 1.45990  | 0.41710  |
| C  | 3.58390  | 1.38545  | -0.11747 |
| H  | 3.37192  | 0.53905  | 0.54288  |
| C  | -1.11907 | -1.98827 | 2.38709  |
| C  | 1.54570  | -1.69182 | 2.29961  |
| C  | -1.54547 | 1.69015  | 2.30020  |
| C  | 1.11902  | 1.98881  | 2.38694  |
| O  | -1.88807 | -2.34822 | 3.19116  |
| O  | 2.43172  | -1.85028 | 3.04708  |
| O  | -2.43137 | 1.84761  | 3.04802  |
| O  | 1.88793  | 2.34907  | 3.19096  |
| Rh | 0.13322  | -1.48427 | 1.09147  |
| Rh | -0.13317 | 1.48407  | 1.09155  |

***anti*-[Rh(CO)<sub>2</sub>]<sub>2</sub>[Ph<sub>4</sub>Pn] (*anti*-5)**

SCF (BP86) Energy = -1907.48422317

Enthalpy 0K = -1907.029008

Enthalpy 298K = -1906.989346

Free Energy 298K = -1907.104728

Lowest Frequency = 24.9880 cm<sup>-1</sup>

Second Frequency = 31.5320 cm<sup>-1</sup>

SCF (BP86-D3BJ) Energy =  
-1907.68055560

SCF (THF) Energy = -1907.49283916

SCF (BS2) Energy = -1907.26007984

|    |          |          |          |
|----|----------|----------|----------|
| Rh | 0.00045  | -2.18984 | -0.89983 |
| C  | 0.72477  | -0.00041 | -0.00018 |
| C  | 1.18618  | -1.16214 | 0.78020  |
| C  | 2.55473  | -1.48089 | 1.25693  |
| C  | 3.45884  | -0.44893 | 1.59031  |
| H  | 3.16637  | 0.59453  | 1.44441  |
| C  | 4.72044  | -0.75293 | 2.12447  |
| H  | 5.40742  | 0.06059  | 2.37908  |
| C  | 5.09875  | -2.08811 | 2.33210  |
| H  | 6.08530  | -2.32345 | 2.74442  |
| C  | 4.20544  | -3.12264 | 2.00332  |
| H  | 4.49503  | -4.16790 | 2.15363  |
| C  | 2.94509  | -2.82261 | 1.47123  |
| H  | 2.25638  | -3.62893 | 1.19541  |
| C  | 0.00029  | -1.78748 | 1.31649  |
| H  | 0.00042  | -2.58179 | 2.06277  |
| C  | -1.18573 | -1.16247 | 0.78026  |
| C  | -2.55419 | -1.48162 | 1.25702  |
| C  | -2.94447 | -2.82350 | 1.47047  |

|    |          |          |          |
|----|----------|----------|----------|
| H  | -2.25577 | -3.62959 | 1.19395  |
| C  | -4.20472 | -3.12393 | 2.00263  |
| H  | -4.49425 | -4.16930 | 2.15226  |
| C  | -5.09796 | -2.08963 | 2.33230  |
| H  | -6.08443 | -2.32525 | 2.74466  |
| C  | -4.71973 | -0.75429 | 2.12550  |
| H  | -5.40668 | 0.05902  | 2.38082  |
| C  | -3.45825 | -0.44990 | 1.59129  |
| H  | -3.16581 | 0.59366  | 1.44602  |
| C  | -0.72468 | -0.00069 | -0.00022 |
| C  | -1.18612 | 1.16182  | -0.77963 |
| C  | -2.55464 | 1.48042  | -1.25654 |
| C  | -3.45894 | 0.44850  | -1.58948 |
| H  | -3.16665 | -0.59495 | -1.44321 |
| C  | -4.72051 | 0.75248  | -2.12375 |
| H  | -5.40760 | -0.06105 | -2.37801 |
| C  | -5.09863 | 2.08761  | -2.33194 |
| H  | -6.08515 | 2.32292  | -2.74434 |
| C  | -4.20514 | 3.12215  | -2.00360 |
| H  | -4.49455 | 4.16739  | -2.15434 |
| C  | -2.94485 | 2.82212  | -1.47139 |
| H  | -2.25603 | 3.62846  | -1.19588 |
| C  | -0.00021 | 1.78713  | -1.31603 |
| H  | -0.00028 | 2.58134  | -2.06241 |
| C  | 1.18584  | 1.16220  | -0.77975 |
| C  | 2.55425  | 1.48124  | -1.25673 |
| C  | 2.94448  | 2.82310  | -1.47044 |
| H  | 2.25578  | 3.62921  | -1.19396 |
| C  | 4.20465  | 3.12350  | -2.00277 |
| H  | 4.49412  | 4.16885  | -2.15262 |
| C  | 5.09793  | 2.08919  | -2.33233 |
| H  | 6.08435  | 2.32480  | -2.74482 |
| C  | 4.71978  | 0.75389  | -2.12526 |
| H  | 5.40673  | -0.05946 | -2.38047 |
| C  | 3.45835  | 0.44953  | -1.59089 |
| H  | 3.16596  | -0.59403 | -1.44547 |
| Rh | -0.00043 | 2.19065  | 0.89950  |
| C  | -1.34180 | 3.01268  | 1.90339  |
| C  | 1.34040  | 3.01173  | 1.90496  |
| O  | 2.16944  | 3.55896  | 2.52362  |
| O  | -2.17127 | 3.56058  | 2.52090  |
| C  | -1.34038 | -3.01093 | -1.90519 |
| C  | 1.34145  | -3.01230 | -1.90378 |
| O  | -2.16947 | -3.55817 | -2.52379 |
| O  | 2.17058  | -3.56067 | -2.52134 |

## References

- (1) Frisch, M. J.; Trucks, G. W.; Schlegel, H. B.; Scuseria, G. E.; Robb, M. A.; Cheeseman, J. R. Scalmani, G.; Barone, V.; Petersson, G. A.; Nakatsuji, H.; Li, X.; Caricato, M.; Marenich, A. V.; Bloino, J.; Janesko, B. G.; Gomperts, R.; Mennucci, B.; Hratchian, H. P.; Ortiz, J. V.; Izmaylov, A. F.; Sonnenberg, J. L.; Williams-Young, D.; Ding, F.; Lipparini, F.; Egidi, F.; Goings, J.; Peng, B.; Petrone, A.; Henderson, T.; Ranasinghe, D.; Zakrzewski, V. G.; Gao, J.; Rega, N.; Zheng, G.; Liang, W.; Hada, M.; Ehara, M.; Toyota, K.; Fukuda, R.; Hasegawa, J.; Ishida, M.; Nakajima, T.; Honda, Y.; Kitao, O.; Nakai, H.; Vreven, T.; Throssell, K.; Montgomery, J. A., Jr.; Peralta, J. E.; Ogliaro, F.; Bearpark, M. J.; Heyd, J. J.; Brothers, E. N.; Kudin, K. N.; Staroverov, V. N.; Keith, T. A.; Kobayashi, R.; Normand, J.; Raghavachari, K.; Rendell, A. P.; Burant, J. C.; Iyengar, S. S.; Tomasi, J.; Cossi, M.; Millam, J. M.; Klene, M.; Adamo, C.; Cammi, R.; Ochterski, J. W.; Martin, R. L.; Morokuma, K.; Farkas, O.; Foresman, J. B.; Fox, D. J. Gaussian 16, Revision C.01., Gaussian Inc., Wallingford CT 2016.
- (2) Andrae, D.; Häußermann, U.; Dolg, M.; Stoll, H.; Preuß, H. Energy-Adjusted Ab Initio Pseudopotentials for the Second and Third Row Transition Elements. *Theor. Chim. Acta* **1990**, *77* (2), 123–141. <https://doi.org/10.1007/BF01114537>
- (3) Hariharan, P. C.; Pople, J. A. The Influence of Polarization Functions on Molecular Orbital Hydrogenation Energies. *Theor. Chim. Acta* **1973**, *28* (3), 213–222. <https://doi.org/10.1007/BF00533485>.
- (4) Hehre, W. J.; Ditchfield, R.; Pople, J. A.; Wall, F. T.; Hiller, L. A.; Wheeler, D. J.; Chern Phys, J.; Hammersley, J. M.; Morton, K. W.; Roy Stat Soc, J.; Herre, W. J.; Ditchfield, R. Self—Consistent Molecular Orbital Methods. XII. Further Extensions of Gaussian—Type Basis Sets for Use in Molecular Orbital Studies of Organic Molecules. *J. Chem. Phys.* **1972**, *56* (5), 2257–2261. <https://doi.org/10.1063/1.1677527>.
- (5) Becke, A. D. Density-Functional Exchange-Energy Approximation with Correct Asymptotic Behavior. *Phys. Rev. A* **1988**, *38* (6), 3098. <https://doi.org/10.1103/PhysRevA.38.3098>.
- (6) Perdew, J. P. Density-Functional Approximation for the Correlation Energy of the Inhomogeneous Electron Gas. *Phys. Rev. B* **1986**, *33* (12), 8822. <https://doi.org/10.1103/PhysRevB.33.8822>.
- (7) Glendening, E. D.; Badenhoop, J. K.; Reed, A. E.; Carpenter, J. E.; Bohmann, J. A.; Morales, C. M.; Karafiloglou, P.; Landis, C. R.; Weinhold, F., NBO 7.0. Theoretical Chemistry Institute, University of Wisconsin: Madison 2018.

## Crystallographic Data

*Anti*-[Rh<sup>I</sup>(COD)]<sub>2</sub>[μ:η<sup>5</sup>:η<sup>5</sup>Ph<sub>4</sub>Pn] (1)

|                                   |                                                 |                  |
|-----------------------------------|-------------------------------------------------|------------------|
| <b>CCDC</b>                       | <b>2309145</b>                                  |                  |
| Identification code               | s21uh9                                          |                  |
| Empirical formula                 | C <sub>48</sub> H <sub>46</sub> Rh <sub>2</sub> |                  |
| Formula weight                    | 828.67                                          |                  |
| Temperature                       | 150.00(10) K                                    |                  |
| Wavelength                        | 0.71073 Å                                       |                  |
| Crystal system                    | Monoclinic                                      |                  |
| Space group                       | P2 <sub>1</sub> /n                              |                  |
| Unit cell dimensions              | a = 11.0316(2) Å                                | α = 90°          |
|                                   | b = 20.0004(3) Å                                | β = 96.9761(19)° |
|                                   | c = 16.3232(3) Å                                | γ = 90°          |
| Volume                            | 3574.83(11) Å <sup>3</sup>                      |                  |
| Z                                 | 4                                               |                  |
| Density (calculated)              | 1.540 Mg/m <sup>3</sup>                         |                  |
| Absorption coefficient            | 0.958 mm <sup>-1</sup>                          |                  |
| F(000)                            | 1696                                            |                  |
| Crystal size                      | 0.430 x 0.302 x 0.179 mm <sup>3</sup>           |                  |
| Theta range for data collection   | 3.236 to 27.485°                                |                  |
| Index ranges                      | -14 ≤ h ≤ 14, -25 ≤ k ≤ 25, -21 ≤ l ≤ 20        |                  |
| Reflections collected             | 32896                                           |                  |
| Independent reflections           | 8194 [R(int) = 0.0275]                          |                  |
| Completeness to theta = 25.242°   | 99.8 %                                          |                  |
| Absorption correction             | Semi-empirical from equivalents                 |                  |
| Max. and min. transmission        | 1.00000 and 0.82879                             |                  |
| Refinement method                 | Full-matrix least-squares on F <sup>2</sup>     |                  |
| Data / restraints / parameters    | 8194 / 0 / 451                                  |                  |
| Goodness-of-fit on F <sup>2</sup> | 1.055                                           |                  |
| Final R indices [I > 2σ(I)]       | R1 = 0.0308, wR2 = 0.0768                       |                  |
| R indices (all data)              | R1 = 0.0363, wR2 = 0.0801                       |                  |
| Extinction coefficient            | n/a                                             |                  |
| Largest diff. peak and hole       | 2.385 and -0.392 e.Å <sup>-3</sup>              |                  |



*Anti*-[Ir<sup>I</sup>(COD)]<sub>2</sub>[μ:η<sup>5</sup>:η<sup>5</sup>Ph<sub>4</sub>Pn] (2)

|                                   |                                                 |                 |
|-----------------------------------|-------------------------------------------------|-----------------|
| <b>CCDC</b>                       | <b>2309146</b>                                  |                 |
| Identification code               | s21uh8                                          |                 |
| Empirical formula                 | C <sub>48</sub> H <sub>46</sub> Ir <sub>2</sub> |                 |
| Formula weight                    | 1007.25                                         |                 |
| Temperature                       | 150.00(10) K                                    |                 |
| Wavelength                        | 0.71073 Å                                       |                 |
| Crystal system                    | Monoclinic                                      |                 |
| Space group                       | P2 <sub>1</sub> /n                              |                 |
| Unit cell dimensions              | a = 10.4071(2) Å                                | α = 90°         |
|                                   | b = 18.5544(5) Å                                | β = 103.209(2)° |
|                                   | c = 19.0926(4) Å                                | γ = 90°         |
| Volume                            | 3589.19(14) Å <sup>3</sup>                      |                 |
| Z                                 | 4                                               |                 |
| Density (calculated)              | 1.864 Mg/m <sup>3</sup>                         |                 |
| Absorption coefficient            | 7.442 mm <sup>-1</sup>                          |                 |
| F(000)                            | 1952                                            |                 |
| Crystal size                      | 0.606 x 0.211 x 0.087 mm <sup>3</sup>           |                 |
| Theta range for data collection   | 3.328 to 27.482°                                |                 |
| Index ranges                      | -13 ≤ h ≤ 13, -24 ≤ k ≤ 22, -24 ≤ l ≤ 24        |                 |
| Reflections collected             | 39304                                           |                 |
| Independent reflections           | 8218 [R(int) = 0.0504]                          |                 |
| Completeness to theta = 25.242°   | 99.8 %                                          |                 |
| Absorption correction             | Semi-empirical from equivalents                 |                 |
| Max. and min. transmission        | 1.00000 and 0.35394                             |                 |
| Refinement method                 | Full-matrix least-squares on F <sup>2</sup>     |                 |
| Data / restraints / parameters    | 8218 / 0 / 451                                  |                 |
| Goodness-of-fit on F <sup>2</sup> | 1.075                                           |                 |
| Final R indices [I > 2σ(I)]       | R1 = 0.0320, wR2 = 0.0636                       |                 |
| R indices (all data)              | R1 = 0.0414, wR2 = 0.0676                       |                 |
| Extinction coefficient            | n/a                                             |                 |
| Largest diff. peak and hole       | 1.484 and -2.054 e.Å <sup>-3</sup>              |                 |

*Anti*-[Rh<sup>I</sup>(NBD)]<sub>2</sub>[μ:η<sup>5</sup>:η<sup>5</sup>Ph<sub>4</sub>Pn] (3)

|                                   |                                                                |                  |
|-----------------------------------|----------------------------------------------------------------|------------------|
| <b>CCDC</b>                       | <b>2309147</b>                                                 |                  |
| Identification code               | s22uh33                                                        |                  |
| Empirical formula                 | C <sub>54</sub> H <sub>54</sub> O <sub>2</sub> Rh <sub>2</sub> |                  |
| Formula weight                    | 940.79                                                         |                  |
| Temperature                       | 150.00(10) K                                                   |                  |
| Wavelength                        | 1.54184 Å                                                      |                  |
| Crystal system                    | Monoclinic                                                     |                  |
| Space group                       | I2/a                                                           |                  |
| Unit cell dimensions              | a = 10.72484(18) Å                                             | α = 90°          |
|                                   | b = 15.12621(19) Å                                             | β = 96.9831(15)° |
|                                   | c = 26.3385(4) Å                                               | γ = 90°          |
| Volume                            | 4241.10(11) Å <sup>3</sup>                                     |                  |
| Z                                 | 4                                                              |                  |
| Density (calculated)              | 1.473 Mg/m <sup>3</sup>                                        |                  |
| Absorption coefficient            | 6.611 mm <sup>-1</sup>                                         |                  |
| F(000)                            | 1936                                                           |                  |
| Crystal size                      | 0.132 x 0.099 x 0.042 mm <sup>3</sup>                          |                  |
| Theta range for data collection   | 5.080 to 68.248°                                               |                  |
| Index ranges                      | -12 ≤ h ≤ 10, -18 ≤ k ≤ 18, -31 ≤ l ≤ 31                       |                  |
| Reflections collected             | 47478                                                          |                  |
| Independent reflections           | 3876 [R(int) = 0.0478]                                         |                  |
| Completeness to theta = 67.684°   | 99.9 %                                                         |                  |
| Absorption correction             | Semi-empirical from equivalents                                |                  |
| Max. and min. transmission        | 1.00000 and 0.68951                                            |                  |
| Refinement method                 | Full-matrix least-squares on F <sup>2</sup>                    |                  |
| Data / restraints / parameters    | 3876 / 72 / 307                                                |                  |
| Goodness-of-fit on F <sup>2</sup> | 1.147                                                          |                  |
| Final R indices [I > 2σ(I)]       | R1 = 0.0893, wR2 = 0.2285                                      |                  |
| R indices (all data)              | R1 = 0.0897, wR2 = 0.2288                                      |                  |
| Extinction coefficient            | n/a                                                            |                  |
| Largest diff. peak and hole       | 5.393 and -1.756 e.Å <sup>-3</sup>                             |                  |

*Anti*-[Rh<sup>I</sup>(C<sub>2</sub>H<sub>4</sub>)<sub>2</sub>]<sub>2</sub>[μ:η<sup>5</sup>:η<sup>5</sup>Ph<sub>4</sub>Pn] (4)

|                                   |                                                                |                  |
|-----------------------------------|----------------------------------------------------------------|------------------|
| <b>CCDC</b>                       | <b>2309148</b>                                                 |                  |
| Identification code               | s23uh11                                                        |                  |
| Empirical formula                 | C <sub>48</sub> H <sub>54</sub> O <sub>4</sub> Rh <sub>2</sub> |                  |
| Formula weight                    | 900.73                                                         |                  |
| Temperature                       | 150.01(10) K                                                   |                  |
| Wavelength                        | 1.54184 Å                                                      |                  |
| Crystal system                    | Triclinic                                                      |                  |
| Space group                       | P-1                                                            |                  |
| Unit cell dimensions              | a = 11.45331(12) Å                                             | α = 70.0281(12)° |
|                                   | b = 11.67087(14) Å                                             | β = 85.1666(10)° |
|                                   | c = 16.3454(2) Å                                               | γ = 76.5215(10)° |
| Volume                            | 1996.91(4) Å <sup>3</sup>                                      |                  |
| Z                                 | 2                                                              |                  |
| Density (calculated)              | 1.498 Mg/m <sup>3</sup>                                        |                  |
| Absorption coefficient            | 7.028 mm <sup>-1</sup>                                         |                  |
| F(000)                            | 928                                                            |                  |
| Crystal size                      | 0.200 x 0.180 x 0.120 mm <sup>3</sup>                          |                  |
| Theta range for data collection   | 3.969 to 72.932°                                               |                  |
| Index ranges                      | -14 ≤ h ≤ 13, -14 ≤ k ≤ 14, -20 ≤ l ≤ 20                       |                  |
| Reflections collected             | 44268                                                          |                  |
| Independent reflections           | 7923 [R(int) = 0.0221]                                         |                  |
| Completeness to theta = 67.684°   | 99.9 %                                                         |                  |
| Absorption correction             | Semi-empirical from equivalents                                |                  |
| Max. and min. transmission        | 1.00000 and 0.62331                                            |                  |
| Refinement method                 | Full-matrix least-squares on F <sup>2</sup>                    |                  |
| Data / restraints / parameters    | 7923 / 0 / 487                                                 |                  |
| Goodness-of-fit on F <sup>2</sup> | 1.071                                                          |                  |
| Final R indices [I > 2σ(I)]       | R1 = 0.0218, wR2 = 0.0573                                      |                  |
| R indices (all data)              | R1 = 0.0222, wR2 = 0.0575                                      |                  |
| Extinction coefficient            | n/a                                                            |                  |
| Largest diff. peak and hole       | 0.550 and -0.589 e.Å <sup>-3</sup>                             |                  |

*Syn*-[Rh<sup>I</sup>(CO)<sub>2</sub>]<sub>2</sub>[μ:η<sup>5</sup>:η<sup>5</sup>Ph<sub>4</sub>Pn] (5)

**CCDC**

**2309149**

|                                   |                                                                                                             |
|-----------------------------------|-------------------------------------------------------------------------------------------------------------|
| Identification code               | s22uh4                                                                                                      |
| Empirical formula                 | C <sub>36</sub> H <sub>22</sub> O <sub>4</sub> Rh <sub>2</sub>                                              |
| Formula weight                    | 724.35                                                                                                      |
| Temperature                       | 150.01(10) K                                                                                                |
| Wavelength                        | 0.71073 Å                                                                                                   |
| Crystal system                    | Monoclinic                                                                                                  |
| Space group                       | P2 <sub>1</sub> /n                                                                                          |
| Unit cell dimensions              | a = 12.7037(2) Å      α = 90°<br>b = 10.34448(16) Å      β = 103.7600(16)°<br>c = 22.6879(4) Å      γ = 90° |
| Volume                            | 2895.92(8) Å <sup>3</sup>                                                                                   |
| Z                                 | 4                                                                                                           |
| Density (calculated)              | 1.661 Mg/m <sup>3</sup>                                                                                     |
| Absorption coefficient            | 1.179 mm <sup>-1</sup>                                                                                      |
| F(000)                            | 1440                                                                                                        |
| Crystal size                      | 0.472 x 0.421 x 0.090 mm <sup>3</sup>                                                                       |
| Theta range for data collection   | 3.302 to 27.497°                                                                                            |
| Index ranges                      | -16 ≤ h ≤ 16, -13 ≤ k ≤ 13, -29 ≤ l ≤ 29                                                                    |
| Reflections collected             | 44989                                                                                                       |
| Independent reflections           | 6633 [R(int) = 0.0305]                                                                                      |
| Completeness to theta = 25.242°   | 99.8 %                                                                                                      |
| Absorption correction             | Gaussian                                                                                                    |
| Max. and min. transmission        | 1.000 and 0.264                                                                                             |
| Refinement method                 | Full-matrix least-squares on F <sup>2</sup>                                                                 |
| Data / restraints / parameters    | 6633 / 0 / 379                                                                                              |
| Goodness-of-fit on F <sup>2</sup> | 1.111                                                                                                       |
| Final R indices [I > 2σ(I)]       | R1 = 0.0231, wR2 = 0.0509                                                                                   |
| R indices (all data)              | R1 = 0.0266, wR2 = 0.0525                                                                                   |
| Extinction coefficient            | n/a                                                                                                         |
| Largest diff. peak and hole       | 0.436 and -0.299 e.Å <sup>-3</sup>                                                                          |

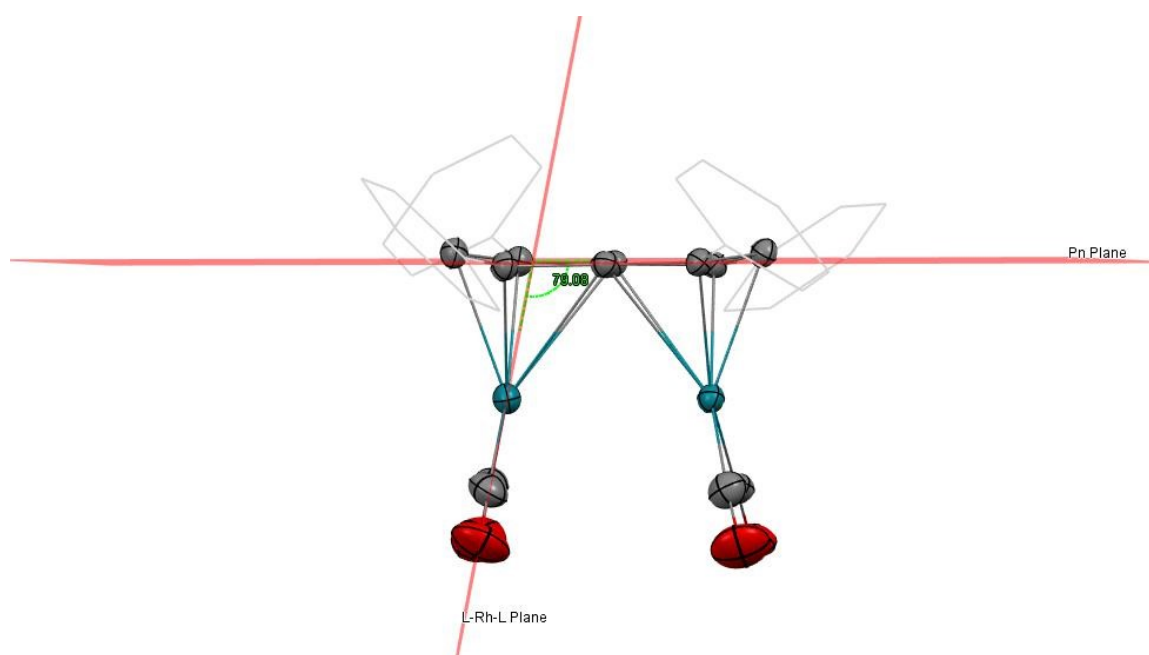

**Figure S63:** Definition of the dihedral between L-Rh-L plane and the plane of  $\text{Ph}_4\text{Pn}^2$ . Value given in main text is the average of each L-Rh-L plane ( $79.08^\circ$  and  $76.60^\circ$ )

[Rh<sup>II</sup>(CO)(PMe<sub>3</sub>)<sub>4</sub>][Ph<sub>4</sub>Pn] (**8**)

|                                   |                                                                                 |                  |
|-----------------------------------|---------------------------------------------------------------------------------|------------------|
| <b>CCDC</b>                       | <b>2309150</b>                                                                  |                  |
| Identification code               | s22uh24                                                                         |                  |
| Empirical formula                 | C <sub>102</sub> H <sub>140</sub> O <sub>5</sub> P <sub>8</sub> Rh <sub>2</sub> |                  |
| Formula weight                    | 1899.71                                                                         |                  |
| Temperature                       | 150.00(10) K                                                                    |                  |
| Wavelength                        | 0.71073 Å                                                                       |                  |
| Crystal system                    | Triclinic                                                                       |                  |
| Space group                       | P-1                                                                             |                  |
| Unit cell dimensions              | a = 12.6981(2) Å                                                                | α = 76.340(2)°   |
|                                   | b = 13.2480(3) Å                                                                | β = 69.8125(19)° |
|                                   | c = 17.4462(4) Å                                                                | γ = 63.790(2)°   |
| Volume                            | 2459.11(10) Å <sup>3</sup>                                                      |                  |
| Z                                 | 1                                                                               |                  |
| Density (calculated)              | 1.283 Mg/m <sup>3</sup>                                                         |                  |
| Absorption coefficient            | 0.516 mm <sup>-1</sup>                                                          |                  |
| F(000)                            | 1002                                                                            |                  |
| Crystal size                      | 0.320 x 0.200 x 0.120 mm <sup>3</sup>                                           |                  |
| Theta range for data collection   | 3.374 to 30.550°                                                                |                  |
| Index ranges                      | -17 ≤ h ≤ 17, -18 ≤ k ≤ 18, -23 ≤ l ≤ 23                                        |                  |
| Reflections collected             | 44004                                                                           |                  |
| Independent reflections           | 13180 [R(int) = 0.0292]                                                         |                  |
| Completeness to theta = 25.242°   | 99.8 %                                                                          |                  |
| Absorption correction             | Semi-empirical from equivalents                                                 |                  |
| Max. and min. transmission        | 1.00000 and 0.97819                                                             |                  |
| Refinement method                 | Full-matrix least-squares on F <sup>2</sup>                                     |                  |
| Data / restraints / parameters    | 13180 / 15 / 608                                                                |                  |
| Goodness-of-fit on F <sup>2</sup> | 1.039                                                                           |                  |
| Final R indices [I > 2σ(I)]       | R1 = 0.0291, wR2 = 0.0673                                                       |                  |
| R indices (all data)              | R1 = 0.0346, wR2 = 0.0699                                                       |                  |
| Extinction coefficient            | n/a                                                                             |                  |
| Largest diff. peak and hole       | 0.850 and -0.456 e.Å <sup>-3</sup>                                              |                  |

[Rh<sup>I</sup>(dppe)<sub>2</sub>][Rh<sup>I</sup>(CO)<sub>2</sub>(η<sup>5</sup>-Ph<sub>4</sub>Pn)] (9)

|                                   |                                                                                 |                  |
|-----------------------------------|---------------------------------------------------------------------------------|------------------|
| <b>CCDC</b>                       | <b>2309151</b>                                                                  |                  |
| Identification code               | s22uh32                                                                         |                  |
| Empirical formula                 | C <sub>102</sub> H <sub>102</sub> O <sub>6</sub> P <sub>4</sub> Rh <sub>2</sub> |                  |
| Formula weight                    | 1753.53                                                                         |                  |
| Temperature                       | 150.00(10) K                                                                    |                  |
| Wavelength                        | 1.54184 Å                                                                       |                  |
| Crystal system                    | Triclinic                                                                       |                  |
| Space group                       | P-1                                                                             |                  |
| Unit cell dimensions              | a = 13.9687(3) Å                                                                | α = 75.3403(16)° |
|                                   | b = 14.9315(3) Å                                                                | β = 87.2098(15)° |
|                                   | c = 22.8545(4) Å                                                                | γ = 79.4900(15)° |
| Volume                            | 4534.28(16) Å <sup>3</sup>                                                      |                  |
| Z                                 | 2                                                                               |                  |
| Density (calculated)              | 1.284 Mg/m <sup>3</sup>                                                         |                  |
| Absorption coefficient            | 4.022 mm <sup>-1</sup>                                                          |                  |
| F(000)                            | 1824                                                                            |                  |
| Crystal size                      | 0.153 x 0.128 x 0.035 mm <sup>3</sup>                                           |                  |
| Theta range for data collection   | 3.784 to 72.980°                                                                |                  |
| Index ranges                      | -17 ≤ h ≤ 16, -18 ≤ k ≤ 17, -28 ≤ l ≤ 18                                        |                  |
| Reflections collected             | 47619                                                                           |                  |
| Independent reflections           | 17878 [R(int) = 0.0430]                                                         |                  |
| Completeness to theta = 67.684°   | 99.9 %                                                                          |                  |
| Absorption correction             | Semi-empirical from equivalents                                                 |                  |
| Max. and min. transmission        | 1.00000 and 0.82514                                                             |                  |
| Refinement method                 | Full-matrix least-squares on F <sup>2</sup>                                     |                  |
| Data / restraints / parameters    | 17878 / 10 / 1082                                                               |                  |
| Goodness-of-fit on F <sup>2</sup> | 1.115                                                                           |                  |
| Final R indices [I > 2σ(I)]       | R1 = 0.0555, wR2 = 0.1492                                                       |                  |
| R indices (all data)              | R1 = 0.0636, wR2 = 0.1549                                                       |                  |
| Extinction coefficient            | n/a                                                                             |                  |
| Largest diff. peak and hole       | 1.496 and -1.079 e.Å <sup>-3</sup>                                              |                  |

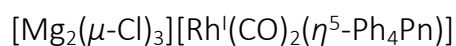

|                                        |                                                                            |                             |
|----------------------------------------|----------------------------------------------------------------------------|-----------------------------|
| <b>CCDC</b>                            | <b>2309152</b>                                                             |                             |
| Identification code                    | s22uh22                                                                    |                             |
| Empirical formula                      | $\text{C}_{58} \text{H}_{70} \text{Cl}_3 \text{Mg}_2 \text{O}_8 \text{Rh}$ |                             |
| Formula weight                         | 1153.02                                                                    |                             |
| Temperature                            | 150.00(10) K                                                               |                             |
| Wavelength                             | 1.54184 Å                                                                  |                             |
| Crystal system                         | Monoclinic                                                                 |                             |
| Space group                            | $P2_1/c$                                                                   |                             |
| Unit cell dimensions                   | $a = 18.23888(15) \text{ \AA}$                                             | $\alpha = 90^\circ$         |
|                                        | $b = 14.65593(8) \text{ \AA}$                                              | $\beta = 103.8749(9)^\circ$ |
|                                        | $c = 21.64988(19) \text{ \AA}$                                             | $\gamma = 90^\circ$         |
| Volume                                 | $5618.32(8) \text{ \AA}^3$                                                 |                             |
| Z                                      | 4                                                                          |                             |
| Density (calculated)                   | $1.363 \text{ Mg/m}^3$                                                     |                             |
| Absorption coefficient                 | $4.409 \text{ mm}^{-1}$                                                    |                             |
| F(000)                                 | 2408                                                                       |                             |
| Crystal size                           | $0.241 \times 0.055 \times 0.030 \text{ mm}^3$                             |                             |
| Theta range for data collection        | $3.677 \text{ to } 72.955^\circ$                                           |                             |
| Index ranges                           | $-22 \leq h \leq 22, -18 \leq k \leq 11, -26 \leq l \leq 26$               |                             |
| Reflections collected                  | 65504                                                                      |                             |
| Independent reflections                | 11168 [R(int) = 0.0473]                                                    |                             |
| Completeness to theta = $67.684^\circ$ | 100.0 %                                                                    |                             |
| Absorption correction                  | Semi-empirical from equivalents                                            |                             |
| Max. and min. transmission             | 1.00000 and 0.76675                                                        |                             |
| Refinement method                      | Full-matrix least-squares on $F^2$                                         |                             |
| Data / restraints / parameters         | 11168 / 36 / 677                                                           |                             |
| Goodness-of-fit on $F^2$               | 1.023                                                                      |                             |
| Final R indices [ $I > 2\sigma(I)$ ]   | $R1 = 0.0316, wR2 = 0.0756$                                                |                             |
| R indices (all data)                   | $R1 = 0.0376, wR2 = 0.0787$                                                |                             |
| Extinction coefficient                 | n/a                                                                        |                             |
| Largest diff. peak and hole            | $0.555 \text{ and } -0.536 \text{ e.\AA}^{-3}$                             |                             |



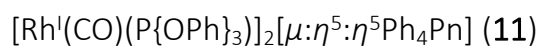

|                                   |                                                                                  |                  |
|-----------------------------------|----------------------------------------------------------------------------------|------------------|
| <b>CCDC</b>                       | <b>2309153</b>                                                                   |                  |
| Identification code               | s23uh3                                                                           |                  |
| Empirical formula                 | C <sub>152</sub> H <sub>128</sub> O <sub>19</sub> P <sub>4</sub> Rh <sub>4</sub> |                  |
| Formula weight                    | 2794.06                                                                          |                  |
| Temperature                       | 150.01(10) K                                                                     |                  |
| Wavelength                        | 1.54184 Å                                                                        |                  |
| Crystal system                    | Monoclinic                                                                       |                  |
| Space group                       | P2 <sub>1</sub> /c                                                               |                  |
| Unit cell dimensions              | a = 14.00549(11) Å                                                               | α = 90°          |
|                                   | b = 19.39104(14) Å                                                               | β = 106.3340(8)° |
|                                   | c = 23.86254(18) Å                                                               | γ = 90°          |
| Volume                            | 6219.04(8) Å <sup>3</sup>                                                        |                  |
| Z                                 | 2                                                                                |                  |
| Density (calculated)              | 1.492 Mg/m <sup>3</sup>                                                          |                  |
| Absorption coefficient            | 5.282 mm <sup>-1</sup>                                                           |                  |
| F(000)                            | 2864                                                                             |                  |
| Crystal size                      | 0.150 x 0.080 x 0.030 mm <sup>3</sup>                                            |                  |
| Theta range for data collection   | 3.861 to 73.007°                                                                 |                  |
| Index ranges                      | -17 ≤ h ≤ 16, -23 ≤ k ≤ 23, -29 ≤ l ≤ 27                                         |                  |
| Reflections collected             | 61512                                                                            |                  |
| Independent reflections           | 12365 [R(int) = 0.0571]                                                          |                  |
| Completeness to theta = 67.684°   | 100.0 %                                                                          |                  |
| Absorption correction             | Semi-empirical from equivalents                                                  |                  |
| Max. and min. transmission        | 1.00000 and 0.87710                                                              |                  |
| Refinement method                 | Full-matrix least-squares on F <sup>2</sup>                                      |                  |
| Data / restraints / parameters    | 12365 / 216 / 961                                                                |                  |
| Goodness-of-fit on F <sup>2</sup> | 1.052                                                                            |                  |
| Final R indices [I > 2σ(I)]       | R1 = 0.0316, wR2 = 0.0746                                                        |                  |
| R indices (all data)              | R1 = 0.0360, wR2 = 0.0773                                                        |                  |
| Extinction coefficient            | n/a                                                                              |                  |
| Largest diff. peak and hole       | 0.528 and -0.499 e.Å <sup>-3</sup>                                               |                  |

[Rh<sup>I</sup>(CO)(P{OMe}<sub>3</sub>)<sub>2</sub>]<sub>2</sub>[μ:η<sup>5</sup>:η<sup>5</sup>Ph<sub>4</sub>Pn] (12)

|                                   |                                                                               |                  |
|-----------------------------------|-------------------------------------------------------------------------------|------------------|
| <b>CCDC</b>                       | <b>2309154</b>                                                                |                  |
| Identification code               | s23uh12                                                                       |                  |
| Empirical formula                 | C <sub>40</sub> H <sub>40</sub> O <sub>8</sub> P <sub>2</sub> Rh <sub>2</sub> |                  |
| Formula weight                    | 916.48                                                                        |                  |
| Temperature                       | 150.00(10) K                                                                  |                  |
| Wavelength                        | 1.54184 Å                                                                     |                  |
| Crystal system                    | Monoclinic                                                                    |                  |
| Space group                       | P2 <sub>1</sub> /n                                                            |                  |
| Unit cell dimensions              | a = 9.87390(5) Å                                                              | α = 90°          |
|                                   | b = 21.78333(8) Å                                                             | β = 102.6820(5)° |
|                                   | c = 17.76504(7) Å                                                             | γ = 90°          |
| Volume                            | 3727.80(3) Å <sup>3</sup>                                                     |                  |
| Z                                 | 4                                                                             |                  |
| Density (calculated)              | 1.633 Mg/m <sup>3</sup>                                                       |                  |
| Absorption coefficient            | 8.414 mm <sup>-1</sup>                                                        |                  |
| F(000)                            | 1856                                                                          |                  |
| Crystal size                      | 0.296 x 0.113 x 0.084 mm <sup>3</sup>                                         |                  |
| Theta range for data collection   | 4.059 to 72.910°                                                              |                  |
| Index ranges                      | -10 ≤ h ≤ 12, -26 ≤ k ≤ 27, -22 ≤ l ≤ 21                                      |                  |
| Reflections collected             | 77133                                                                         |                  |
| Independent reflections           | 7423 [R(int) = 0.0237]                                                        |                  |
| Completeness to theta = 67.684°   | 100.0 %                                                                       |                  |
| Absorption correction             | Gaussian                                                                      |                  |
| Max. and min. transmission        | 1.000 and 0.554                                                               |                  |
| Refinement method                 | Full-matrix least-squares on F <sup>2</sup>                                   |                  |
| Data / restraints / parameters    | 7423 / 0 / 475                                                                |                  |
| Goodness-of-fit on F <sup>2</sup> | 1.127                                                                         |                  |
| Final R indices [I > 2σ(I)]       | R1 = 0.0201, wR2 = 0.0492                                                     |                  |
| R indices (all data)              | R1 = 0.0202, wR2 = 0.0493                                                     |                  |
| Extinction coefficient            | n/a                                                                           |                  |
| Largest diff. peak and hole       | 0.435 and -0.365 e.Å <sup>-3</sup>                                            |                  |
